# Supplementary material for: Quantitative capillary zone electrophoresis-mass spectrometry reveals the N -glycome developmental plan during vertebrate embryogenesis
Source: Royal Society of Chemistry journal article supplement (doi:10.1039/d0mo00005a), 2020-02-26
Supplement: d0mo00005a2.xlsx [file d0mo00005a2.xlsx]

## Sheet: Title
Quantitative Capillary Zone Electrophoresis-Mass Spectrometry Reveals the N-glycome Developmental Plan during Vertebrate Embryogenesis
Table S1: Single-shot CZE-ESI-MS/MS analysis of extract glycan fractions

## Sheet: Sheet1
#	Glycan Composition	TMT6-glycan Theoretical Mass (M)	TMT6-glycan Observed Mass (M)	error (ppm)	Extracted Ion Electropherogram (EIE) Peak Area
					Fraction 1	Fraction 2	Fraction 3	Fraction 4	Concentration-adjusted Combination
1	G2(10)000	2345.93	2345.92	-2.0461	-	-	1.08392e+06	3.94473e+06	5.02864e+06
2	G21100	1033.51	1033.51	-2.99948	2.96805e+06	2.75112e+06	-	-	1.44064e+07
3	G22000	1049.51	1049.5	-2.95377	155041344	222038656	-	-	1131240000
4	G22100	1195.56	1195.56	-3.84755	162819376	204600992	-	-	897660112
5	G23000	1211.56	1211.56	-2.88884	114667424	370670016	14281885	-	1099624189
6	G23100	1357.62	1357.61	-3.68292	4.97276e+07	308420224	15337649	-	7.81361e+08
7	G24000	1373.61	1373.62	6.18806	23549170	-	52089244	-	122736754
8	G24001	1453.58	1453.58	-2.06387	3575748	5.7039e+06	314282	-	2.24493e+07
9	G24100	1519.67	1519.66	-4.21144	659457	1.98814e+07	6.50845e+06	-	4.82496e+07
10	G25000	1535.67	1535.66	-3.45127	8.09601e+06	603115520	6.57496e+08	50691064	1.93871e+09
11	G25001	1615.63	1615.63	-2.29013	4.12429e+06	1.92802e+07	790785	-	5.17241e+07
12	G25100	1681.72	1681.72	-3.56777	-	5.17992e+06	4.82969e+06	628414	1.5818e+07
13	G26000	1697.72	1697.71	-3.41635	-	1.8273e+08	489068800	1.41887e+08	9.96415e+08
14	G26001	1777.68	1777.68	-1.85635	3.96581e+06	61217152	1.78456e+06	-	1.36116e+08
15	G27000	1859.77	1859.76	-3.7639	-	28535724	1.46133e+08	6.25064e+07	2.6571e+08
16	G27001	1939.74	1939.73	-1.80437	-	2.59527e+07	767539	-	5.2673e+07
17	G27002	2019.7	2019.7	-0.396098	-	1.4031e+06	-	-	2.8062e+06
18	G28000	2021.82	2021.82	-2.8687	-	1.14936e+07	1.25127e+08	1.07332e+08	2.55446e+08
19	G28001	2101.79	2101.79	-1.85556	-	4.90005e+06	-	-	9800109
20	G28002	2181.76	2181.76	1.23754	-	1.54241e+06	-	-	3.08482e+06
21	G29000	2183.88	2183.87	-3.75479	-	4640345	7.65415e+07	1.02059e+08	1.87881e+08
22	G33000	1414.64	1414.63	-3.74654	939444	21815996	1.50921e+06	-	4.79595e+07
23	G33100	1560.7	1560.69	-4.35703	990178	2.37801e+07	4.56475e+06	344092	5.54395e+07
24	G34000	1576.69	1576.69	-3.74201	454719	21242856	11539038	595523	5.59844e+07
25	G34100	1722.75	1722.74	-4.17937	-	10363840	8.15262e+06	495450	2.93757e+07
26	G34110	2013.85	2013.84	-2.92972	2.75395e+06	4.11425e+06	-	-	1.64903e+07
27	G35000	1738.74	1738.74	-4.08341	-	9635192	19489736	1.77113e+06	4.05313e+07
28	G35100	1884.8	1884.8	-3.71392	-	1.77854e+06	4.34923e+06	793125	8.69944e+06
29	G35110	2175.9	2175.89	-5.19326	-	285030	-	-	570060
30	G36000	1900.8	1900.79	-2.68308	-	1948203	7.43979e+06	2.95835e+06	1.42945e+07
31	G36001	1980.76	1980.76	-1.46408	-	9613454	-	-	19226908
32	G36002	2060.73	2060.73	0.388212	-	559960	-	-	1.11992e+06
33	G36010	2191.89	2191.89	-3.4217	-	683070	-	-	1.36614e+06
34	G37002	2222.78	2222.78	-2.51936	-	2346554	-	-	4693108
35	G38002	2384.84	2384.83	-1.09022	-	1.19009e+06	-	-	2.38019e+06
36	G43000	1617.72	1617.72	-1.11268	-	1.01078e+07	-	-	2.02157e+07
37	G43100	1763.78	1763.77	-4.13885	-	25002242	1.08297e+07	671575	6.15058e+07
38	G44100	1925.83	1925.82	-3.11554	-	2462250	4.14184e+06	588886	9.65522e+06
39	G44110	2216.92	2216.92	-4.195	-	3.41943e+06	-	-	6.83886e+06
40	G45000	1941.82	1941.82	-3.86235	-	2764575	6.68381e+06	1.56152e+06	1.37745e+07
41	G45010	2232.92	2232.92	-1.11961	-	1.77282e+06	-	-	3.54563e+06
42	G45020	2524.01	2524.01	-1.94135	-	1.63368e+06	-	-	3.26736e+06
43	G45100	2087.88	2087.88	-3.25689	-	1.07582e+06	6.13028e+06	1.78066e+06	1.00626e+07
44	G45110	2378.98	2378.97	-4.16145	-	5.51924e+06	-	-	1.10385e+07
45	G45120	2670.07	2670.07	-0.337069	-	9.50931e+06	238721	-	1.92573e+07
46	G45200	2233.94	2233.94	-0.940043	-	158719	991215	455659	1.76431e+06
47	G46000	2103.88	2103.87	-2.04385	-	757432	3.77305e+06	1.5619e+06	6.84982e+06
48	G46002	2263.81	2263.81	0.0883467	-	6.66887e+06	-	-	13337737
49	G46010	2394.97	2394.96	-6.80592	-	26711	-	-	53422.1
50	G46100	2249.93	2249.93	-0.533349	-	214571	1.08814e+06	821626	2.33891e+06
51	G46120	2832.13	2832.12	-0.42371	-	624485	-	-	1.24897e+06
52	G46200	2395.99	2395.99	-1.71119	-	-	1.12062e+06	1.11944e+06	2.24006e+06
53	G46300	2542.05	2542.04	-4.56325	-	-	311845	394612	706457
54	G47000	2265.93	2265.92	-5.5165	-	60324.3	603012	700344	1.424e+06
55	G47002	2425.86	2425.86	-1.31912	-	20420160	-	-	40840320
56	G47200	2558.05	2558.04	-2.30645	-	-	284208	520514	804722
57	G48002	2587.91	2587.91	-0.386411	-	3.61174e+06	-	-	7.22347e+06
58	G53000	1820.8	1820.79	-3.29526	-	20380696	1.14297e+07	861438	5.30525e+07
59	G53100	1966.86	1966.85	-3.30477	-	73139384	4.86833e+07	3.33569e+06	1.98298e+08
60	G54000	1982.85	1982.84	-3.93373	-	8994658	1.26937e+07	1.24505e+06	3.19281e+07
61	G54100	2128.91	2128.9	-2.58348	-	19468722	3.3526e+07	4.50888e+06	7.69723e+07
62	G54200	2274.97	2274.96	-4.30776	-	289495	785386	201633	1.56601e+06
63	G55000	2144.9	2144.9	-3.26355	-	1.67732e+06	5.80463e+06	1.22044e+06	1.03797e+07
64	G55010	2436	2435.99	-5.13137	-	1.38186e+06	-	-	2.76372e+06
65	G55020	2727.09	2727.09	-0.293353	-	957426	-	-	1.91485e+06
66	G55100	2290.96	2290.96	-2.35709	-	4.01462e+06	1.79999e+07	5.01462e+06	3.10438e+07
67	G55110	2582.06	2582.05	-1.78153	-	4.10025e+06	-	-	8.20049e+06
68	G55120	2873.15	2873.15	-1.28778	-	2.88677e+06	-	-	5.77355e+06
69	G55200	2437.02	2437.01	-2.33892	-	309635	2.39851e+06	1.17477e+06	4.19255e+06
70	G55300	2583.08	2583.06	-4.72305	-	-	403102	362128	765231
71	G56000	2306.96	2306.95	-0.823596	-	-	1.05148e+06	-	1.05148e+06
72	G56010	2598.05	2598.05	0.269433	-	772747	-	-	1.54549e+06
73	G56020	2889.15	2889.15	-0.484572	-	2.80929e+06	-	-	5.61858e+06
74	G56030	3180.24	3180.24	-0.628883	-	539677	-	-	1.07935e+06
75	G56100	2453.01	2453.01	-3.50589	-	170427	2.1345e+06	1.44558e+06	3.92093e+06
76	G56110	2744.11	2744.09	-5.5027	-	1.47284e+06	301031	-	3.24672e+06
77	G56120	3035.2	3035.2	-1.12019	-	6.31819e+06	-	-	1.26364e+07
78	G56130	3326.3	3326.3	0.96203	-	2.84941e+06	-	-	5.69882e+06
79	G56200	2599.07	2599.07	-1.34663	-	-	878253	362128	1.24038e+06
80	G56210	2890.17	2890.16	-1.1418	-	1.21875e+06	-	-	2.4375e+06
81	G56300	2745.13	2745.13	-0.874276	-	-	3.67902e+06	6.00417e+06	9.68319e+06
82	G57000	2469.01	2469	-1.9846	-	-	246734	412913	659647
83	G57120	3197.26	3197.25	-1.90789	-	1.26043e+06	-	-	2.52085e+06
84	G57130	3488.35	3488.35	0.315335	-	195358	-	-	390716
85	G57300	2907.18	2907.18	-1.99506	-	-	1.32813e+06	4.56092e+06	5.88904e+06
86	G63100	2169.93	2169.92	-7.23524	-	4370439	6.27365e+06	-	1.50145e+07
87	G64100	2331.99	2331.97	-5.87482	-	1.016e+06	3.6626e+06	750751	6.44536e+06
88	G64110	2623.08	2623.06	-7.35775	-	2.47424e+06	-	-	4.94847e+06
89	G65010	2639.08	2639.05	-9.16987	-	677494	-	-	1.35499e+06
90	G65100	2494.04	2494.04	-2.04487	-	-	1.56156e+06	762105	2.32366e+06
91	G65100	2656.09	2656.08	-3.42608	-	-	411657	368624	780282
92	G65110	2785.14	2785.13	-2.1902	-	2.74791e+06	-	-	5.49583e+06
93	G65120	3076.23	3076.22	-2.11297	-	636328	-	-	1.27266e+06
94	G65200	2640.1	2640.09	-4.16651	-	-	800280	685302	1.48558e+06
95	G65300	2786.16	2786.14	-5.27609	-	-	1.84213e+06	1.73412e+06	3.57625e+06
96	G66010	2801.13	2801.12	-3.42719	-	803529	-	-	1.60706e+06
97	G66110	2947.19	2947.17	-5.46283	-	2.76305e+06	640127	-	6.16623e+06
98	G66120	3238.28	3238.28	-2.09988	-	1.82483e+06	-	-	3.64965e+06
99	G66130	3529.38	3529.37	-2.94669	-	381709	-	-	763418
100	G66210	3093.25	3093.24	-1.5841	-	-	404178	-	404178
101	G66300	2948.21	2948.21	-0.746216	-	-	1.35043e+06	3.45791e+06	4.80834e+06
102	G67030	3545.37	3545.38	0.338469	-	84929.6	-	-	169859
103	G67040	3836.47	3836.48	1.48574	-	48386.4	-	-	96772.8
104	G67110	3109.24	3109.24	-1.31865	-	-	515611	-	515611
105	G67120	3400.34	3400.33	-3.05852	-	918265	-	-	1.83653e+06
106	G67130	3691.43	3691.43	-0.785603	-	426008	-	-	852016
107	G67210	3255.3	3255.29	-2.8876	-	-	322116	-	322116
108	G67300	3110.26	3110.25	-4.9192	-	-	-	1.6454e+06	1.6454e+06
109	G68300	3272.31	3272.3	-4.95062	-	-	-	1.03745e+06	1.03745e+06
110	G68400	3418.37	3418.35	-6.3773	-	-	-	530063	530063
111	G68500	3564.43	3564.42	-2.13218	-	-	-	603389	603389
112	G74110	2826.16	2826.14	-8.8813	-	1.16373e+06	-	-	2.32745e+06
113	G76110	3150.27	3150.25	-4.25361	-	-	717587	-	717587
114	G76120	3441.36	3441.35	-5.23048	-	2.05529e+06	-	-	4.11059e+06
115	G76300	3151.29	3151.28	-3.33197	-	-	-	1.14289e+06	1.14289e+06
116	G77110	3312.32	3312.3	-4.89083	-	-	412784	-	412784
117	G77120	3603.42	3603.4	-3.8297	-	740590	-	-	1.48118e+06
118	G77140	4185.61	4185.59	-4.30045	-	40779.2	-	-	81558.5
119	G77210	3458.38	3458.37	-2.13973	-	-	407985	-	407985
120	G77300	3313.34	3313.33	-2.65593	-	-	-	899596	899596
121	G77310	3604.44	3604.42	-5.6042	-	-	186412	-	186412
122	G77400	3459.4	3459.39	-1.64768	-	-	-	476384	476384
123	G78140	4347.66	4347.68	5.52021	-	52491.7	-	-	104983
124	G78500	3767.51	3767.5	-3.71598	-	-	-	379710	379710
125	G86120	3644.44	3644.44	-1.97561	-	1.31556e+06	-	-	2.63112e+06
126	G86130	3935.54	3935.53	-3.27782	-	359477	-	-	718955
127	G87120	3806.5	3806.47	-5.46434	-	557921	-	-	1.11584e+06
128	G87140	4388.69	4388.69	1.48108	-	38796.7	-	-	77593.3
129	G87210	3661.46	3661.43	-7.18293	-	-	272235	-	272235
130	G87310	3807.52	3807.5	-3.04661	-	-	451985	-	451985
131	G87500	3808.54	3808.52	-4.09606	-	-	-	351777	351777
132	G88500	3970.59	3970.56	-6.57333	-	-	-	301621	301621
133	G95120	3685.47	3685.44	-6.702	-	1.83869e+06	-	-	3.67738e+06
134	G96120	3847.52	3847.49	-7.97916	-	645683	-	-	1.29137e+06
