# Supplementary material for: Quantitative capillary zone electrophoresis-mass spectrometry reveals the N -glycome developmental plan during vertebrate embryogenesis
Source: Royal Society of Chemistry journal article supplement (doi:10.1039/d0mo00005a), 2020-02-26
Supplement: d0mo00005a3.xlsx [file d0mo00005a3.xlsx]

## Sheet: Title
Quantitative Capillary Zone Electrophoresis-Mass Spectrometry Reveals the N-glycome Developmental Plan during Vertebrate Embryogenesis
Table S2: N-glycan compositions quantified across six embryonic stages of Xenopus laevis

## Sheet: Full
#	Glycan Composition	Theoretical Mass	Observed Mass	error (ppm)	Log2 (Glycan Experission Ratio)					p-value (Stage41 vs Stage1 )
					Stage5 /Stage1	Stage8 /Stage1	Stage13 /Stage1	Stage22 /Stage1	Stage41 /Stage1
1	G22000	1049.51	1049.5	-2.95377	0.193509	0.211828	0.169522	0.0749949	-1.84827	0.0227723
2	G22100	1195.56	1195.56	-3.84755	0.0269999	0.179994	0.335289	0.199682	-0.846688	0.0434299
3	G23000	1211.56	1211.56	-2.88884	0.00232737	0.049299	0.0088285	-0.0822813	-0.988425	0.00451241
4	G23100	1357.62	1357.61	-3.68292	0.0411593	0.167133	0.134993	0.271209	-0.542825	0.0316944
5	G24000	1373.61	1373.61	-4.00404	-0.0548645	0.0243216	0.161739	0.327205	-0.476554	0.0809776
6	G33000	1414.64	1414.63	-3.74654	-0.0396536	0.03789	0.313119	0.534564	1.54003	0.0399212
7	G24100	1519.67	1519.66	-4.21144	-0.0674408	0.151854	0.148917	0.0330657	-0.831226	0.0275601
8	G25000	1535.67	1535.66	-3.45127	-0.0792572	-0.0992252	-0.132359	-0.195851	-0.594212	0.0777228
9	G33100	1560.7	1560.69	-4.35703	0.00189537	0.214427	0.258429	0.328902	0.727041	0.0167227
10	G34000	1576.69	1576.69	-3.74201	0.180105	0.26822	0.10387	0.0863315	0.479227	0.328368
11	G43000	1617.72	1617.72	-1.11268	-0.704436	0.162979	-0.114774	0.0865284	0.0571273	0.461112
12	G26000	1697.72	1697.71	-3.41635	-0.0225421	-0.0611878	0.121893	0.135328	0.104695	0.310126
13	G25100	1681.72	1681.72	-3.56777	-0.106853	0.0917345	0.0911423	-0.0703007	-0.631483	0.0654723
14	G34100	1722.75	1722.74	-4.17937	0.0114221	-0.0960645	0.187975	0.223304	1.13133	0.0311378
15	G35000	1738.74	1738.74	-4.08341	0.0100086	-0.00490385	-0.163254	-0.391543	-1.10036	0.0353151
16	G43100	1763.78	1763.77	-4.13885	0.0247395	-0.0176896	-0.0223292	0.0812028	0.304943	0.148566
17	G53000	1820.8	1820.79	-3.29526	0.23304	0.144001	0.0192488	0.576974	1.4436	0.00182524
18	G27000	1859.77	1859.76	-3.7639	-0.0295987	-0.0670509	-0.0909541	0.123776	0.381797	0.00409184
19	G44100	1925.83	1925.82	-3.11554	0.147303	0.419195	0.58881	0.749224	1.92571	0.0446633
20	G45000	1941.82	1941.82	-3.86235	0.546972	0.467374	-0.130192	-0.17266	0.900255	0.278005
21	G53100	1966.86	1966.85	-3.30477	0.0514636	0.140957	0.0474353	-0.0846332	0.124286	0.412601
22	G54000	1982.85	1982.84	-3.93373	-0.183627	-0.203375	-0.488354	-0.416798	1.44604	0.0096134
23	G28000	2021.82	2021.82	-2.8687	0.0797739	0.0277651	-0.0670637	0.317139	0.832175	0.00683024
24	G45100	2087.88	2087.88	-3.25689	-0.120678	-0.162235	-0.0543333	-0.117849	2.56638	0.022887
25	G46000	2103.88	2103.87	-2.04385	-0.102399	-0.178072	-0.490641	-0.335542	0.377174	0.28851
26	G54100	2128.91	2128.9	-2.58348	-0.157865	-0.197774	-0.258085	-0.639337	0.856455	0.018552
27	G55000	2144.9	2144.9	-3.26355	-0.201287	-0.178205	-0.353733	-0.425834	1.93677	0.00140943
28	G63100	2169.93	2169.92	-5.94488	-0.0985618	-0.0420732	-0.22806	-0.181459	0.54261	0.0353376
29	G29000	2183.88	2183.87	-3.75479	-0.0136938	0.0798646	-0.0411943	0.35965	0.476367	0.0432947
30	G35100	1884.8	1884.8	-3.71392	-0.537657	-0.141428	-0.209575	-0.0953671	-0.258823	0.281874
31	G55100	2290.96	2290.96	-2.35709	0.149977	-0.0402585	0.0711248	-0.0261826	2.83375	0.00400507
32	G56000	2306.96	2306.95	-0.823596	-0.00800729	-0.0406718	-0.313286	-0.0765551	2.93379	0.00118772
33	G2(10)000	2345.93	2345.92	-2.0461	-0.141924	0.148232	0.573817	1.83477	2.71955	1.99442e-05
34	G55200	2437.02	2437.01	-2.33892	0.020265	-0.03655	-0.229124	-0.475839	-1.05879	0.00591948
35	G56100	2453.01	2453.01	-3.50589	0.00404156	0.0210976	-0.128709	-0.494085	1.42233	0.000327907
36	G65100	2494.04	2494.04	-2.04487	-0.0912424	-0.0331183	-0.309995	-0.935095	0.67014	0.228918
37	G46100	2249.93	2249.93	-0.533349	0.0483653	0.165871	0.41243	0.626427	2.3184	0.00114311
38	G47000	2265.93	2265.92	-5.5165	0.0184028	0.351029	0.0665463	-0.0925987	0.135227	0.756411
39	G46200	2395.99	2395.99	-1.71119	-0.0879651	-0.0668364	-0.187359	-0.809045	-1.75177	4.54621e-05
40	G55300	2583.08	2583.06	-4.72305	-0.0819201	-0.0164175	-0.422113	-1.06722	-1.65728	0.00505005
41	G56200	2599.07	2599.07	-1.34663	0.0652073	-0.0235553	-0.3381	-1.18168	-1.36591	0.0208977
42	G65200	2640.1	2640.09	-4.16651	-0.211559	-0.240631	-0.289445	-1.63619	-1.98826	0.0211091
43	G66100	2656.09	2656.08	-3.42608	0.0626266	-0.0103309	-0.234847	-0.954461	1.43689	0.0365286
44	G57000	2469.01	2469	-1.9846	-0.0886327	0.140456	-0.113635	-0.306789	-0.0932987	0.824898
45	G47200	2558.05	2558.04	-2.30645	0.17111	0.0131268	-0.255932	-0.780603	-3.38118	0.010276
46	G56300	2745.13	2745.13	-0.874276	0.145156	-0.219404	-0.632242	-1.86256	-2.69418	0.00704737
47	G65300	2786.16	2786.14	-5.27609	0.19483	0.0239907	-0.313479	-1.97628	-3.30852	0.000252843
48	G57300	2907.18	2907.18	-1.99506	0.129337	0.0196609	-0.244228	-0.454947	-1.7627	0.0459069
49	G66300	2948.21	2948.21	-0.746216	0.0393737	-0.0834698	-0.450334	-1.36862	-2.79192	0.00100424
50	G25001	1615.63	1615.63	-2.29013	-0.0258451	-0.0376305	-0.415023	-1.24924	-2.80252	0.00013
51	G26001	1777.68	1777.68	-1.85635	-0.05412	-0.0801023	-0.489212	-0.956859	-3.33214	7.92254e-07
52	G27001	1939.74	1939.73	-1.80437	-0.123389	-0.00262715	-0.382878	-0.871578	-2.13092	0.00350509
53	G24001	1453.58	1453.58	-2.06387	-0.105249	-0.0749619	-0.527826	-1.18058	-4.60601	0.00320414
54	G36001	1980.76	1980.76	-1.46408	-0.0631788	0.0294231	0.100937	-0.00879046	-0.35692	0.055062
55	G48002	2587.91	2587.91	-0.386411	-0.208792	-0.0588234	-0.109563	-0.494561	-0.0224315	0.744084
56	G38002	2384.84	2384.83	-1.09022	-0.0379155	0.152429	0.156371	-0.0518811	0.569015	0.265774
57	G47002	2425.86	2425.86	-1.31912	-0.123359	0.0483983	-0.112641	-0.202142	-0.806795	0.0133461
58	G37002	2222.78	2222.78	-2.51936	0.0428002	0.177032	0.124477	0.129132	-0.750909	0.0261318
59	G46002	2263.81	2263.81	0.0883467	-0.279274	0.112592	-0.00765889	0.0446243	-0.704519	0.229787
60	G36002	2060.73	2060.73	0.388212	0.00315759	0.0490453	0.052764	-0.0848954	-1.1411	0.0131073
61	G67300	3110.26	3110.25	-4.9192	-0.236096	-0.1763	-0.300318	-0.440236	-1.20425	0.00285365
62	G76300	3151.29	3151.28	-3.33197	-0.154683	-0.15955	-0.30799	-1.22822	-1.90372	0.000708177
63	G68300	3272.31	3272.3	-4.95062	0.0472657	0.205295	0.161008	-0.597137	-1.09002	0.037472
64	G77300	3313.34	3313.33	-2.65593	-0.265859	-0.201241	-0.408669	-1.46573	-2.34596	0.000984744
65	G68400	3418.37	3418.35	-6.3773	-0.168349	0.30213	0.293944	-0.524068	-1.02213	0.0696883
66	G68500	3564.43	3564.42	-2.13218	0.43413	0.122825	-0.333994	-1.54884	-2.03658	0.00759107
67	G78500	3767.51	3767.5	-3.71598	-0.0958357	-0.200207	-0.337765	-1.95957	-3.39424	0.00114357
68	G87500	3808.54	3808.52	-4.09606	-0.0955027	-0.403214	-0.28248	-1.2211	-2.47115	0.0856903
69	G88500	3970.59	3970.56	-6.57333	0.310621	0.48906	0.16912	-1.21914	-3.25818	0.0458854
70	G34110	2013.85	2013.84	-2.92972	-0.0182508	0.038195	0.176359	0.310439	-1.01314	0.0178782
71	G44110	2216.92	2216.92	-4.195	-0.0104967	0.138665	0.17345	0.416483	-0.565983	0.0765318
72	G45010	2232.92	2232.92	-1.11961	-0.0315783	0.143425	0.0526377	0.558628	1.51849	0.00188405
73	G45110	2378.98	2378.97	-4.16145	-0.218479	-0.0563314	0.295078	1.47882	3.29716	0.000276124
74	G54110	2420	2420	-0.3719	-0.0736391	0.036424	-0.112937	1.01942	1.70948	0.0447676
75	G55010	2436	2435.99	-5.13137	-0.0451262	0.0609297	-0.156452	0.10191	1.75187	0.000607601
76	G55110	2582.06	2582.05	-1.78153	-0.197069	-0.115138	-0.134026	-0.0673822	1.60893	0.00284131
77	G56010	2598.05	2598.05	0.269433	-0.0435995	0.0291267	-0.110485	-0.245782	1.48356	5.77946e-06
78	G64110	2623.08	2623.06	-7.35775	-0.170094	-0.199041	-0.454494	-1.13738	-1.01343	0.0524883
79	G65010	2639.08	2639.05	-9.16987	-0.0750443	-0.042179	-0.4772	-1.01633	-0.153148	0.407747
80	G56110	2744.11	2744.09	-5.5027	-0.596393	-0.0802078	0.192196	0.553733	2.72595	0.000857345
81	G65110	2785.14	2785.13	-2.1902	-0.263521	-0.182266	-0.147337	-0.169482	0.713727	0.00530492
82	G66010	2801.13	2801.12	-3.42719	-0.0796083	-0.0170053	0.0553583	-0.0827439	1.17308	0.029629
83	G74110	2826.16	2826.14	-8.8813	-0.127015	-0.0682042	-0.244902	-0.535361	-1.06096	0.00966976
84	G56210	2890.17	2890.16	-1.1418	-0.00978987	0.0607369	-0.133634	-0.285169	-0.878894	0.0193108
85	G66110	2947.19	2947.17	-5.46283	0.0251039	0.00779366	-0.183171	-0.198245	1.65354	0.00265364
86	G66210	3093.25	3093.24	-1.5841	-0.130641	0.0168416	-0.00720799	-0.22709	-0.966726	0.00164383
87	G67110	3109.24	3109.24	-1.31865	0.371581	0.427318	0.450581	0.403564	2.55722	0.0150462
88	G76110	3150.27	3150.25	-4.25361	-0.111584	-0.0662186	-0.232193	-0.816609	0.0451554	0.769633
89	G67210	3255.3	3255.29	-2.8876	0.03495	0.00505141	-0.195809	-0.31148	-0.705323	0.0440199
90	G77110	3312.32	3312.3	-4.89083	0.105675	0.195754	-0.0701435	-0.558669	0.0318355	0.867461
91	G77310	3604.44	3604.42	-5.6042	0.0217062	0.153921	-0.250614	-0.914097	-1.8108	0.0139931
92	G87210	3661.46	3661.43	-7.18293	-0.0191591	-0.0742656	-0.329875	-1.38134	-2.36849	0.00427021
93	G87310	3807.52	3807.5	-3.04661	-0.0953316	-0.0110315	-0.228212	-1.34315	-2.51746	0.0209208
94	G35020	2320.94	2320.94	3.87775	-0.0325182	-0.113764	-0.254106	-0.576831	-3.42481	0.00578446
95	G45020	2524.01	2524.01	-1.94135	-0.0441689	-0.00569024	0.00777929	1.60335	2.97969	0.0027046
96	G45120	2670.07	2670.07	-0.337069	0.047304	0.302844	0.362554	1.88332	2.40221	0.0350375
97	G55120	2873.15	2873.15	-1.28778	-0.0981797	0.134386	0.336061	0.721996	-0.188288	0.723983
98	G55020	2727.09	2727.09	-0.293353	-0.0205062	0.0565292	0.00277437	0.427023	-0.464845	0.118931
99	G56120	3035.2	3035.2	-1.12019	0.142669	0.371762	0.877751	2.3136	2.81278	0.0376456
100	G56020	2889.15	2889.15	-0.484572	0.0955429	0.273941	0.403754	1.34309	1.87714	0.00208631
101	G66120	3238.28	3238.28	-2.09988	0.172111	0.399521	0.384118	0.951172	0.474957	0.452625
102	G75120	3279.31	3279.3	-2.71398	-0.237393	-0.0700379	-0.458444	-1.43789	-2.87639	0.00787994
103	G67120	3400.34	3400.33	-3.05852	0.381042	0.358113	0.786726	1.39628	2.11394	0.00512425
104	G76120	3441.36	3441.35	-5.23048	-0.172243	0.22372	0.274591	-0.546208	-1.29986	0.0679991
105	G95120	3685.47	3685.44	-6.702	-0.119054	-0.125693	-0.550825	-1.73082	-3.08441	0.0510781
106	G87120	3806.5	3806.47	-5.46434	0.190208	0.0837554	-0.337592	-1.62906	-2.18705	0.265851
107	G96120	3847.52	3847.49	-7.97916	-0.0887617	-0.0567285	-0.512437	-2.56998	-3.86284	1.76063e-06
108	G56030	3180.24	3180.24	-0.628883	-0.464752	-1.21847	-0.272716	6.32179	8.09787	0.0846006
109	G56130	3326.3	3326.3	0.96203	-0.245561	0.0707815	0.449911	1.34638	2.44892	0.0131244
110	G67130	3691.43	3691.43	-0.785603	0.2794	0.0475919	0.585829	1.65111	0.976214	0.479649
* Glycan compositions were represented as G (HexNAc; Hex; Fuc; NeuAc; phosphate)

## Sheet: Changed
Statistically significant N-glycan compositions that differentially expressed across six embryonic stages
#	Glycan Composition	Log2 (Glycan Experission Ratio)					p-value (Stage41 vs Stage1 )
		Stage5 /Stage1	Stage8 /Stage1	Stage13 /Stage1	Stage22 /Stage1	Stage41 /Stage1
1	G2(10)000	-0.141924	0.148232	0.573817	1.83477	2.71955	1.99 × 10-5
2	G22000	0.193509	0.211828	0.169522	0.0749949	-1.84827	2.27 × 10-2
3	G23000	0.00232737	0.049299	0.0088285	-0.0822813	-0.988425	4.51 × 10-3
4	G24001	-0.105249	-0.0749619	-0.527826	-1.18058	-4.60601	3.20 × 10-3
5	G25001	-0.0258451	-0.0376305	-0.415023	-1.24924	-2.80252	1.30 × 10-4
6	G26001	-0.05412	-0.0801023	-0.489212	-0.956859	-3.33214	7.92 × 10-7
7	G27000	-0.0295987	-0.0670509	-0.0909541	0.123776	0.381797	4.09 × 10-3
8	G27001	-0.123389	-0.00262715	-0.382878	-0.871578	-2.13092	3.50 × 10-3
9	G28000	0.0797739	0.0277651	-0.0670637	0.317139	0.832175	6.83× 10-3
10	G33100	0.00189537	0.214427	0.258429	0.328902	0.727041	1.67 × 10-2
11	G34110	-0.0182508	0.038195	0.176359	0.310439	-1.01314	1.79 × 10-2
12	G35020	-0.0325182	-0.113764	-0.254106	-0.576831	-3.42481	5.78 × 10-3
13	G36002	0.00315759	0.0490453	0.052764	-0.0848954	-1.1411	1.31 × 10-2
14	G37002	0.0428002	0.177032	0.124477	0.129132	-0.750909	2.61 × 10-2
15	G45010	-0.0315783	0.143425	0.0526377	0.558628	1.51849	1.88 × 10-3
16	G45020	-0.0441689	-0.00569024	0.00777929	1.60335	2.97969	2.70 × 10-3
17	G45100	-0.120678	-0.162235	-0.0543333	-0.117849	2.56638	2.29 × 10-2
18	G45110	-0.218479	-0.0563314	0.295078	1.47882	3.29716	2.76 × 10-4
19	G46100	0.0483653	0.165871	0.41243	0.626427	2.3184	1.14 × 10-3
20	G46200	-0.0879651	-0.0668364	-0.187359	-0.809045	-1.75177	4.55 × 10-5
21	G47002	-0.123359	0.0483983	-0.112641	-0.202142	-0.806795	1.33 × 10-2
22	G47200	0.17111	0.0131268	-0.255932	-0.780603	-3.38118	1.03 × 10-2
23	G53000	0.23304	0.144001	0.0192488	0.576974	1.4436	1.83 × 10-3
24	G54000	-0.183627	-0.203375	-0.488354	-0.416798	1.44604	9.61 × 10-3
25	G54100	-0.157865	-0.197774	-0.258085	-0.639337	0.856455	1.86 × 10-2
26	G55000	-0.201287	-0.178205	-0.353733	-0.425834	1.93677	1.41 × 10-3
27	G55010	-0.0451262	0.0609297	-0.156452	0.10191	1.75187	6.07 × 10-4
28	G55100	0.149977	-0.0402585	0.0711248	-0.0261826	2.83375	4.00 × 10-3
29	G55110	-0.197069	-0.115138	-0.134026	-0.0673822	1.60893	2.84 × 10-3
30	G55200	0.020265	-0.03655	-0.229124	-0.475839	-1.05879	5.92 × 10-3
31	G55300	-0.0819201	-0.0164175	-0.422113	-1.06722	-1.65728	5.05 × 10-3
32	G56000	-0.00800729	-0.0406718	-0.313286	-0.0765551	2.93379	1.19 × 10-3
33	G56010	-0.0435995	0.0291267	-0.110485	-0.245782	1.48356	5.77× 10-6
34	G56020	0.0955429	0.273941	0.403754	1.34309	1.87714	2.08 × 10-3
35	G56100	0.00404156	0.0210976	-0.128709	-0.494085	1.42233	3.27 × 10-4
36	G56110	-0.596393	-0.0802078	0.192196	0.553733	2.72595	8.57 × 10-4
37	G56130	-0.245561	0.0707815	0.449911	1.34638	2.44892	1.31 × 10-2
38	G56200	0.0652073	-0.0235553	-0.3381	-1.18168	-1.36591	2.08 × 10-2
39	G56210	-0.00978987	0.0607369	-0.133634	-0.285169	-0.878894	1.93 × 10-2
40	G56300	0.145156	-0.219404	-0.632242	-1.86256	-2.69418	7.04 × 10-3
41	G65110	-0.263521	-0.182266	-0.147337	-0.169482	0.713727	5.30 × 10-3
42	G65200	-0.211559	-0.240631	-0.289445	-1.63619	-1.98826	2.11 × 10-2
43	G65300	0.19483	0.0239907	-0.313479	-1.97628	-3.30852	2.52 × 10-4
44	G66110	0.0251039	0.00779366	-0.183171	-0.198245	1.65354	2.65 × 10-3
45	G66210	-0.130641	0.0168416	-0.00720799	-0.22709	-0.966726	1.64 × 10-3
46	G66300	0.0393737	-0.0834698	-0.450334	-1.36862	-2.79192	1.00 × 10-3
47	G67110	0.371581	0.427318	0.450581	0.403564	2.55722	1.50 × 10-2
48	G67120	0.381042	0.358113	0.786726	1.39628	2.11394	5.12 × 10-3
49	G67300	-0.236096	-0.1763	-0.300318	-0.440236	-1.20425	2.85 × 10-3
50	G68500	0.43413	0.122825	-0.333994	-1.54884	-2.03658	7.59 × 10-3
51	G74110	-0.127015	-0.0682042	-0.244902	-0.535361	-1.06096	9.67 × 10-3
52	G75120	-0.237393	-0.0700379	-0.458444	-1.43789	-2.87639	7.88 × 10-3
53	G76300	-0.154683	-0.15955	-0.30799	-1.22822	-1.90372	7.08 × 10-4
54	G77300	-0.265859	-0.201241	-0.408669	-1.46573	-2.34596	9.84 × 10-4
55	G78210	0.0217062	0.153921	-0.250614	-0.914097	-1.8108	1.40 × 10-2
56	G78500	-0.0958357	-0.200207	-0.337765	-1.95957	-3.39424	1.14 × 10-3
57	G87210	-0.0191591	-0.0742656	-0.329875	-1.38134	-2.36849	4.27 × 10-3
58	G87310	-0.0953316	-0.0110315	-0.228212	-1.34315	-2.51746	2.09 × 10-2
59	G96120	-0.0887617	-0.0567285	-0.512437	-2.56998	-3.86284	1.76 × 10-6
