# Supplementary material for: Quantitative capillary zone electrophoresis-mass spectrometry reveals the N -glycome developmental plan during vertebrate embryogenesis
Source: Royal Society of Chemistry journal article supplement (doi:10.1039/d0mo00005a), 2020-02-26
Supplement: d0mo00005a4.xlsx [file d0mo00005a4.xlsx]

## Sheet: Title
Quantitative Capillary Zone Electrophoresis-Mass Spectrometry Reveals the N-glycome Developmental Plan during Vertebrate Embryogenesis
Table S3: Formerly glycosylated peptides/proteins identifed in Xenopus laevis embryos

## Sheet: Stage 1
Protein	N-glycosylation Sites (N#)	N-glycosylation Probabilities /Deamidation Probablities	Intensity	Relative Intensity (%)
gnl|Xelaev18039573m|PAC4GC:7348058|serpina6.L	TYQDDDCKIIELPYKN#DTAMLLVVPQLGK	TYQDDDCKIIELPYKN(1)DTAMLLVVPQLGK	52853000000	15.1075
gnl|Xelaev18006806m|PAC4GC:7332602|tyrp1.L	NTIEGYSEPNGQYN#ATVR	NTIEGYSEPNGQYN(1)ATVR	11740000000	3.35576
gnl|Xelaev18040333m|PAC4GC:7346728|crp.1.L	VFLFPEESN#SSYVK	VFLFPEESN(1)SSYVK	9587900000	2.7406
gnl|Xelaev18025048m|PAC4GC:7365360|ctbs.S	LVLKGDVPLQDIVDPNN#R.T	LVLKGDVPLQDIVDPNN(1)R.T	8615000000	2.46251
gnl|Xelaev18034311m|PAC4GC:7367982|pzp.L	ASNLGEVN#VTVK	ASNLGEVN(1)VTVK	6608900000	1.88909
gnl|Xelaev18035426m|PAC4GC:7367207|hyou1.L	VFGSLN#LTTVKLNGVGESFQKR	VFGSLN(1)LTTVKLNGVGESFQKR	5907700000	1.68866
gnl|Xelaev18015585m|PAC4GC:7352498|lamp1.S	FALPSDAVTN#ISK	FALPSDAVTN(1)ISK	5846400000	1.67113
gnl|Xelaev18017384m|PAC4GC:7343473|hsp90b1.L	HNN#DTQHIWESDSNEFFVTDDPRGDTLGR	HNN(0.981)DTQHIWESDSNEFFVTDDPRGDTLGR	4924800000	1.4077
gnl|Xelaev18036351m|PAC4GC:7366086|ece1.L	LAN#ITIPQEKR	LAN(1)ITIPQEKR	4501800000	1.28679
gnl|Xelaev18037174m|PAC4GC:7356539|psap.S	YVDELLEKN#ATESR	YVDELLEKN(1)ATESR	4396200000	1.25661
gnl|Xelaev18034910m|PAC4GC:7367992|psap.L	YVDELLEKN#ATEIR	YVDELLEKN(1)ATEIR	4310600000	1.23214
gnl|Xelaev18034322m|PAC4GC:7366409|ovos2.L	VN#ISIFSEK	VN(1)ISIFSEK	4294600000	1.22757
gnl|Xelaev18016668m|PAC4GC:7342528|upk3a.L	VIASN#YTGTQGGLLGPYQVAK	VIASN(1)YTGTQGGLLGPYQVAK	3740800000	1.06927
gnl|Xelaev18037944m|PAC4GC:7356321|ece1.S	YFQACMN#ETKIEELGAKPLQDLIQK	YFQACMN(1)ETKIEELGAKPLQDLIQK	3680500000	1.05203
gnl|Xelaev18037944m|PAC4GC:7356321|ece1.S	FYN#FSAR	FYN(1)FSAR	3623200000	1.03565
gnl|Xelaev18028086m|PAC4GC:7328886|zpax.L	IGYGIN#TTESR	IGYGIN(1)TTESR	3584800000	1.02468
gnl|Xelaev18038715m|PAC4GC:7347128|lamp2.L	N#VTQIIYDVK	N(1)VTQIIYDVK	3561500000	1.01802
gnl|Xelaev18006638m|PAC4GC:7329666|ncln.L	VIYN#LTEK	VIYN(1)LTEK	3538200000	1.01136
gnl|Xelaev18006455m|PAC4GC:7331346|bsg.L	QVIN#VSVSPQVLHLK	QVIN(1)VSVSPQVLHLK	3502700000	1.00121
gnl|Xelaev18030932m|PAC4GC:7326185|gpnmb.L	GHRQHYPVTKASLLYVVTDQIPFYVN#ISQK	GHRQHYPVTKASLLYVVTDQIPFYVN(1)ISQK	3462600000	0.989749
gnl|Xelaev18034325m|PAC4GC:7367760|Xelaev18034325m	LAGNFLQN#LTTDSAGK	LAGNFLQN(1)LTTDSAGK	3296600000	0.942299
gnl|Xelaev18013051m|PAC4GC:7354635|lamp1.L	MDNAN#ATFHDIR	MDNAN(1)ATFHDIR	3087700000	0.882587
gnl|Xelaev18043096m|PAC4GC:7360088|fkbp10.L	YHYN#GTFKDGQKFDASYDR	YHYN(1)GTFKDGQKFDASYDR	3062900000	0.875499
gnl|Xelaev18013051m|PAC4GC:7354635|lamp1.L	VGLQMN#ITYTTK	VGLQMN(1)ITYTTK	3024200000	0.864437
gnl|Xelaev18019129m|PAC4GC:7344853|c3.L	YEDTPQQN#YTINFEVK	YEDTPQQN(1)YTINFEVK	3022800000	0.864036
gnl|Xelaev18038715m|PAC4GC:7347128|lamp2.L	KGLLSSPATFLGPVPLN#STYK	KGLLSSPATFLGPVPLN(1)STYK	3006200000	0.859291
gnl|Xelaev18036483m|PAC4GC:7366842|Xelaev18036483m	LVTN#STNLEPFTVNVENKR	LVTN(1)STNLEPFTVNVENKR	2846000000	0.8135
gnl|Xelaev18034910m|PAC4GC:7367992|psap.L	EVVTVLGNYLKDN#ITQDEIK	EVVTVLGNYLKDN(1)ITQDEIK	2797100000	0.799522
gnl|Xelaev18037944m|PAC4GC:7356321|ece1.S	EYLVEISSLIN#STDKR	EYLVEISSLIN(1)STDKR	2722100000	0.778084
gnl|Xelaev18015585m|PAC4GC:7352498|lamp1.S	DGKN#ASYVFNIDSK	DGKN(1)ASYVFNIDSK	2700500000	0.77191
gnl|Xelaev18012624m|PAC4GC:7355191|fuca1.L	EN#STVNLWYTSK	EN(1)STVNLWYTSK	2587300000	0.739553
gnl|Xelaev18025048m|PAC4GC:7365360|ctbs.S	QVN#SSLTGR	QVN(1)SSLTGR	2572400000	0.735294
gnl|Xelaev18038715m|PAC4GC:7347128|lamp2.L	LEAFVPN#GTLGK	LEAFVPN(1)GTLGK	2567700000	0.733951
gnl|Xelaev18043872m|PAC4GC:7361008|ctsa.L	QYSGFLN#VSDGK	QYSGFLN(1)VSDGK	2528500000	0.722746
gnl|Xelaev18009507m|PAC4GC:7335084|alb.S	LAHN#LTEEVTHFIK	LAHN(1)LTEEVTHFIK	2461100000	0.70348
gnl|Xelaev18037944m|PAC4GC:7356321|ece1.S	ELYLN#KTENEK	ELYLN(1)KTENEK	2451200000	0.70065
gnl|Xelaev18034809m|PAC4GC:7366275|tm9sf3.L	IVDVN#LTSEGKVK	IVDVN(1)LTSEGKVK	2429000000	0.694305
gnl|Xelaev18019337m|PAC4GC:7343722|zpy1.L	MGYGLN#ATATR	MGYGLN(1)ATATR	2386800000	0.682242
gnl|Xelaev18044625m|PAC4GC:7360674|dpp4.L	VLLDEVQMPTKEN#K.S	VLLDEVQMPTKEN(1)K	2317300000	0.662376
gnl|Xelaev18024368m|PAC4GC:7365343|ctsd.S	NPDTQPGGELLLGGTDPTYYTGDFSYMN#VTRK	NPDTQPGGELLLGGTDPTYYTGDFSYMN(1)VTRK	2308000000	0.659718
gnl|Xelaev18015585m|PAC4GC:7352498|lamp1.S	MEN#VTATFHDIKLEAYLK	MEN(1)VTATFHDIKLEAYLK	2203000000	0.629705
gnl|Xelaev18015849m|PAC4GC:7351290|cd63.S	YN#TTKDITESIDLLQK	YN(1)TTKDITESIDLLQK	2174100000	0.621444
gnl|Xelaev18042091m|PAC4GC:7341752|lamp2.S	LEAFMAN#GTLGK	LEAFMAN(1)GTLGK	2135900000	0.610525
gnl|Xelaev18013051m|PAC4GC:7354635|lamp1.L	DGKN#GSYVFNIESK	DGKN(1)GSYVFNIESK	2101900000	0.600807
gnl|Xelaev18024367m|PAC4GC:7365000|LOC613063.S	YYTGDFHYLN#VTRK	YYTGDFHYLN(1)VTRK	2016400000	0.576367
gnl|Xelaev18008052m|PAC4GC:7332841|lnpep.L	FMALQKDSLN#SSHPISTDVR	FMALQKDSLN(1)SSHPISTDVR	1975200000	0.564591
gnl|Xelaev18037174m|PAC4GC:7356539|psap.S	DN#ITQGEIKDYLNK	DN(1)ITQGEIKDYLNK	1778000000	0.508223
gnl|Xelaev18037982m|PAC4GC:7356648|emc1.S	FINYN#QTISR	FINYN(1)QTISR	1701600000	0.486385
gnl|Xelaev18042802m|PAC4GC:7341697|ncstn.S	LLN#ATHQVGCQSSK	LLN(1)ATHQVGCQSSK	1680800000	0.480439
gnl|Xelaev18038039m|PAC4GC:7357387|fcgbp.S	VCKMDN#LTTEFEVHVR	VCKMDN(1)LTTEFEVHVR	1678500000	0.479782
gnl|Xelaev18022257m|PAC4GC:7362979|ganab.L	NQASLLLEVYGLDGN#MTR	NQASLLLEVYGLDGN(1)MTR	1678400000	0.479753
gnl|Xelaev18019093m|PAC4GC:7344772|man2b1.L	ETWKLN#QTEPVAGNYYPVNSR	ETWKLN(1)QTEPVAGNYYPVNSR	1662500000	0.475209
gnl|Xelaev18028086m|PAC4GC:7328886|zpax.L	LIDCFPN#GTIAVTVLK	LIDCFPN(1)GTIAVTVLK	1563700000	0.446968
gnl|Xelaev18042091m|PAC4GC:7341752|lamp2.S	EVVVSEN#VTQIIYDVK	EVVVSEN(1)VTQIIYDVK	1556700000	0.444967
gnl|Xelaev18010883m|PAC4GC:7337008|hexb.S	GQLSGTYGPVNPIIN#DTYSFMYK	GQLSGTYGPVNPIIN(1)DTYSFMYK	1510200000	0.431675
gnl|Xelaev18033564m|PAC4GC:7333654|tmx3.S	LVAVAVIDEKN#NSIEHTR	LVAVAVIDEKN(0.92)NSIEHTR	1505300000	0.430275
gnl|Xelaev18008160m|PAC4GC:7330017|hexb.L	GLETFSQLIYEDSFGAFLIN#KTHIEDSPR	GLETFSQLIYEDSFGAFLIN(1)KTHIEDSPR	1490300000	0.425987
gnl|Xelaev18035426m|PAC4GC:7367207|hyou1.L	DIN#ATAQNIMFYDMGAR	DIN(1)ATAQNIMFYDMGAR	1477500000	0.422328
gnl|Xelaev18035426m|PAC4GC:7367207|hyou1.L	LAALDSLLN#HSSIFLK	LAALDSLLN(1)HSSIFLK	1467300000	0.419413
gnl|Xelaev18031912m|PAC4GC:7325345|npc1.L	YLHTGPPVYFVVEEGHN#YTTK	YLHTGPPVYFVVEEGHN(1)YTTK	1460200000	0.417383
gnl|Xelaev18035426m|PAC4GC:7367207|hyou1.L	LITDTWTWKN#ETLAEQAK	LITDTWTWKN(1)ETLAEQAK	1438500000	0.41118
gnl|Xelaev18043096m|PAC4GC:7360088|fkbp10.L	YHYN#GTLLDGTYFDSSYSR	YHYN(1)GTLLDGTYFDSSYSR	1381600000	0.394916
gnl|Xelaev18043096m|PAC4GC:7360088|fkbp10.L	YHYN#GTLMDGALFDSSYSR	YHYN(1)GTLMDGALFDSSYSR	1374800000	0.392972
gnl|Xelaev18004404m|PAC4GC:7324387|hyou1.S	LISDTWTWKN#ETLAEQAK	LISDTWTWKN(1)ETLAEQAK	1374300000	0.39283
gnl|Xelaev18034322m|PAC4GC:7366409|ovos2.L	N#FSETFLWR	N(1)FSETFLWR	1355800000	0.387542
gnl|Xelaev18010883m|PAC4GC:7337008|hexb.S	VEPLNFN#GTAQQK	VEPLNFN(1)GTAQQK	1351800000	0.386398
gnl|Xelaev18030881m|PAC4GC:7325164|pon2.L	VQNIHSDNPIVTQVYVNN#GSVIQASSSAAVYEGK	VQNIHSDNPIVTQVYVNN(1)GSVIQASSSAAVYEGK	1350800000	0.386112
gnl|Xelaev18037944m|PAC4GC:7356321|ece1.S	HLLEN#STMN#TSSSAERK	HLLEN(1)STMN(1)TSSSAERK	1298700000	0.37122
gnl|Xelaev18035426m|PAC4GC:7367207|hyou1.L	LSEDLIYSPEELLGMILN#YSR	LSEDLIYSPEELLGMILN(1)YSR	1289100000	0.368476
gnl|Xelaev18004404m|PAC4GC:7324387|hyou1.S	LSEDLTYSPEELLGMVLN#YSR	LSEDLTYSPEELLGMVLN(1)YSR	1165800000	0.333232
gnl|Xelaev18021172m|PAC4GC:7348655|LOC100493461.S	ISN#MSIVGQDFGESILEPGR	ISN(1)MSIVGQDFGESILEPGR	1146800000	0.327801
gnl|Xelaev18045149m|PAC4GC:7359772|naga.L	PYTTSLGLLN#ITQCTDGYK	PYTTSLGLLN(1)ITQCTDGYK	1105200000	0.31591
gnl|Xelaev18036351m|PAC4GC:7366086|ece1.L	EYLVEVSSLIN#STDKR	EYLVEVSSLIN(1)STDKR	1092600000	0.312308
gnl|Xelaev18037944m|PAC4GC:7356321|ece1.S	ELVPAVDWMPFLQTLSYPVPIN#ESEPVVVYAK	ELVPAVDWMPFLQTLSYPVPIN(1)ESEPVVVYAK	1081000000	0.308993
gnl|Xelaev18004404m|PAC4GC:7324387|hyou1.S	DIN#ATAQNVMFYDMGTR	DIN(1)ATAQNVMFYDMGTR	1070100000	0.305877
gnl|Xelaev18008160m|PAC4GC:7330017|hexb.L	YYKVEPLSFN#GTAQQK	YYKVEPLSFN(1)GTAQQK	1063500000	0.303991
gnl|Xelaev18022257m|PAC4GC:7362979|ganab.L	EFN#YSQGKLTASSLDPSGVFK	EFN(1)YSQGKLTASSLDPSGVFK	1061200000	0.303333
gnl|Xelaev18012761m|PAC4GC:7353347|gusb.L	YAESFGN#QSLNHHLTVMEELVR	YAESFGN(1)QSLNHHLTVMEELVR	1041300000	0.297645
gnl|Xelaev18007833m|PAC4GC:7329260|p2rx4.L	VKGVVVTN#TTELGVK	VKGVVVTN(1)TTELGVK	1031900000	0.294958
gnl|Xelaev18036483m|PAC4GC:7366842|Xelaev18036483m	IIADTQSCNNN#KTAVSR	IIADTQSCNNN(0.993)KTAVSR	1010900000	0.288955
gnl|Xelaev18006455m|PAC4GC:7331346|bsg.L	VLKEDKDSSNTMTYN#VTGLPGDGSGQYTCEFLTTPDVK	VLKEDKDSSNTMTYN(1)VTGLPGDGSGQYTCEFLTTPDVK	1009500000	0.288555
gnl|Xelaev18036351m|PAC4GC:7366086|ece1.L	HLLEN#STMN#TSSTAEHK	HLLEN(1)STMN(1)TSSTAEHK	1009400000	0.288527
gnl|Xelaev18013138m|PAC4GC:7353635|uggt2.L	N#ITASSVNGLKHDEL	N(1)ITASSVNGLKHDEL	1007100000	0.287869
gnl|Xelaev18027773m|PAC4GC:7329131|loc100145763.L	AQVN#FSEYLEVVQLALALN#HSDCPEAIK	AQVN(1)FSEYLEVVQLALALN(1)HSDCPEAIK	1006900000	0.287812
gnl|Xelaev18036483m|PAC4GC:7366842|Xelaev18036483m	LYGAN#QTFWADSK	LYGAN(1)QTFWADSK	1004800000	0.287212
gnl|Xelaev18019904m|PAC4GC:7350071|Xetrov90007272m.S	FQN#VTDTWRK	FQN(1)VTDTWRK	996270000	0.284774
gnl|Xelaev18017419m|PAC4GC:7345043|tmpo.L	LLLGITESN#KTEN	LLLGITESN(0.999)KTEN	985990000	0.281835
gnl|Xelaev18019023m|PAC4GC:7343278|slc44a2.L	DGFNN#FTKSPVEVLR	DGFNN(0.978)FTKSPVEVLR	933420000	0.266809
gnl|Xelaev18042379m|PAC4GC:7340094|clptm1.S	DYIPIN#TSVSALPLR	DYIPIN(1)TSVSALPLR	892120000	0.255003
gnl|Xelaev18036568m|PAC4GC:7366542|Xelaev18036568m	FYN#ETIDYKK	FYN(1)ETIDYKK	891440000	0.254809
gnl|Xelaev18011715m|PAC4GC:7353429|vtn.L	N#ISEGFHDIPDNIDAAFALPANNHNDREK	N(1)ISEGFHDIPDNIDAAFALPANNHNDREK	862710000	0.246597
gnl|Xelaev18034325m|PAC4GC:7367760|Xelaev18034325m	NN#VSMSFSEAEGMPGSK	NN(1)VSMSFSEAEGMPGSK	819520000	0.234251
gnl|Xelaev18039299m|PAC4GC:7347040|pld3.L	DTPMQVMLN#STASQVYLSSSPPPLSATGR	DTPMQVMLN(1)STASQVYLSSSPPPLSATGR	811620000	0.231993
gnl|Xelaev18045844m|PAC4GC:7339342|hm13.S	AELEPATLHN#ETEAAAN#GTGK	AELEPATLHN(1)ETEAAAN(1)GTGK	806200000	0.230444
gnl|Xelaev18036482m|PAC4GC:7367937|fcgbp.L	VN#YTSGSLQKR	VN(1)YTSGSLQKR	790950000	0.226085
gnl|Xelaev18001839m|PAC4GC:7369391|nup210.L	GANN#NTFIVR	GANN(0.982)NTFIVR	789960000	0.225802
gnl|Xelaev18039083m|PAC4GC:7347964|clptm1.L	DYIPIN#TSVSTLPLR	DYIPIN(1)TSVSTLPLR	736960000	0.210652
gnl|Xelaev18008052m|PAC4GC:7332841|lnpep.L	ETTLLYKEN#SSSIEDK	ETTLLYKEN(1)SSSIEDK	710080000	0.202969
gnl|Xelaev18022851m|PAC4GC:7361815|zpd.L	IRYPIISSGYPN#DTTVAMIQTLDNSLTR	IRYPIISSGYPN(1)DTTVAMIQTLDNSLTR	695930000	0.198924
gnl|Xelaev18002816m|PAC4GC:7321669|cercam.L	IIDAIDGGAMN#SSDIKR	IIDAIDGGAMN(1)SSDIKR	694440000	0.198499
gnl|Xelaev18019093m|PAC4GC:7344772|man2b1.L	NGPYGQSN#STVMR	NGPYGQSN(1)STVMR	685830000	0.196037
gnl|Xelaev18008052m|PAC4GC:7332841|lnpep.L	LMEHGLELLN#NTLIK	LMEHGLELLN(0.985)NTLIK	685800000	0.196029
gnl|Xelaev18008344m|PAC4GC:7332329|c9.L	LTPTENKN#VSVNANAGIGYSK	LTPTENKN(1)VSVNANAGIGYSK	684510000	0.19566
gnl|Xelaev18018636m|PAC4GC:7343628|tmed4.L	FTFTSHMPGEHQICLHSN#STR	FTFTSHMPGEHQICLHSN(1)STR	675690000	0.193139
gnl|Xelaev18034983m|PAC4GC:7367712|fam213a.L	EKEFGDKAN#LTAVLDAAR	EKEFGDKAN(1)LTAVLDAAR	673590000	0.192539
gnl|Xelaev18039299m|PAC4GC:7347040|pld3.L	ELGATIYN#CSCLAQDLKK	ELGATIYN(1)CSCLAQDLKK	669590000	0.191395
gnl|Xelaev18033141m|PAC4GC:7334692|stt3b.S	AMSSN#ETAAYEIMK	AMSSN(1)ETAAYEIMK	655990000	0.187508
gnl|Xelaev18043872m|PAC4GC:7361008|ctsa.L	LDPPCVN#STASR	LDPPCVN(1)STASR	653720000	0.186859
gnl|Xelaev18006821m|PAC4GC:7330968|ermp1.L	QLVTPGGHSTGFN#ASTAR	QLVTPGGHSTGFN(1)ASTAR	636640000	0.181977
gnl|Xelaev18013345m|PAC4GC:7353944|cd63.L	YN#NTKEMADSIDLLQKEFK	YN(0.96)NTKEMADSIDLLQKEFK	627140000	0.179262
gnl|Xelaev18007833m|PAC4GC:7329260|p2rx4.L	NILSN#ISSSYLK	NILSN(1)ISSSYLK	625350000	0.17875
gnl|Xelaev18015849m|PAC4GC:7351290|cd63.S	NGMSKYN#TTKDITESIDLLQK	NGMSKYN(1)TTKDITESIDLLQK	621730000	0.177715
gnl|Xelaev18038039m|PAC4GC:7357387|fcgbp.S	LNGELIYMPATLFHGN#LSIK	LNGELIYMPATLFHGN(1)LSIK	621030000	0.177515
gnl|Xelaev18013051m|PAC4GC:7354635|lamp1.L	IIFPN#ASEN#GTK	IIFPN(1)ASEN(1)GTK	605590000	0.173102
gnl|Xelaev18006806m|PAC4GC:7332602|tyrp1.L	VVCEFVEDYESLGTICN#STR	VVCEFVEDYESLGTICN(1)STR	589990000	0.168643
gnl|Xelaev18020783m|PAC4GC:7348797|nptn.S	VTDGGLAELNN#GSGR	VTDGGLAELNN(1)GSGR	586950000	0.167774
gnl|Xelaev18005330m|PAC4GC:7330318|asah1.L	GN#VSWYTVNLDQAPQER	GN(1)VSWYTVNLDQAPQER	585240000	0.167285
gnl|Xelaev18016746m|PAC4GC:7342462|ovch1.L	MLN#ESTEQIR	MLN(1)ESTEQIR	583350000	0.166745
gnl|Xelaev18010883m|PAC4GC:7337008|hexb.S	GLETFSQLIYEDSYGAFMIN#KTHIEDSPR	GLETFSQLIYEDSYGAFMIN(1)KTHIEDSPR	582780000	0.166582
gnl|Xelaev18009936m|PAC4GC:7337270|bsg.S	MVVN#VSVSPQVLHLK	MVVN(1)VSVSPQVLHLK	578800000	0.165444
gnl|Xelaev18031616m|PAC4GC:7326494|ssr1.L	YPQDYQFYIQN#FTALPLNTVVPPQK	YPQDYQFYIQN(1)FTALPLNTVVPPQK	578540000	0.16537
gnl|Xelaev18008160m|PAC4GC:7330017|hexb.L	LTGTFGPVNPILN#DTYNFMYTFFQEVSK	LTGTFGPVNPILN(0.998)DTYNFMYTFFQEVSK	578520000	0.165364
gnl|Xelaev18019337m|PAC4GC:7343722|zpy1.L	YN#NSVIGR	YN(1)NSVIGR	566110000	0.161817
gnl|Xelaev18016343m|PAC4GC:7351247|ctsc.S	IQIQSQLSQKPILSPQQVVSCSN#YSQGCDGGFPYLIAGK	IQIQSQLSQKPILSPQQVVSCSN(1)YSQGCDGGFPYLIAGK	562990000	0.160925
gnl|Xelaev18038039m|PAC4GC:7357387|fcgbp.S	ELYQSFN#SCGILK	ELYQSFN(1)SCGILK	560770000	0.16029
gnl|Xelaev18038039m|PAC4GC:7357387|fcgbp.S	VWLPN#GSFEK	VWLPN(1)GSFEK	545530000	0.155934
gnl|Xelaev18016500m|PAC4GC:7350998|stim1.S	LAITN#ATMTGSLLK	LAITN(1)ATMTGSLLK	544100000	0.155525
gnl|Xelaev18006379m|PAC4GC:7332507|ifi30.L	YFPILFCMESSHN#VTK	YFPILFCMESSHN(1)VTK	529130000	0.151246
gnl|Xelaev18007399m|PAC4GC:7330880|zp3.2.L	EQIICN#FTR	EQIICN(1)FTR	525970000	0.150343
gnl|Xelaev18039178m|PAC4GC:7348189|neu1.L	N#LSHEIGTK	N(1)LSHEIGTK	525340000	0.150163
gnl|Xelaev18036351m|PAC4GC:7366086|ece1.L	AQSYFQACMN#ESKIEELGAKPLQDLIQK	AQSYFQACMN(1)ESKIEELGAKPLQDLIQK	518940000	0.148334
gnl|Xelaev18026446m|PAC4GC:7327791|cnpy3.L	VVMDIPYELWN#ETSAEVADMKK	VVMDIPYELWN(1)ETSAEVADMKK	514220000	0.146985
gnl|Xelaev18019023m|PAC4GC:7343278|slc44a2.L	GVVMVGN#STTFDDGRGDKQR	GVVMVGN(1)STTFDDGRGDKQR	511310000	0.146153
gnl|Xelaev18038039m|PAC4GC:7357387|fcgbp.S	LWRN#DSLCPFR	LWRN(1)DSLCPFR	506510000	0.144781
gnl|Xelaev18015453m|PAC4GC:7350871|gpm6b.S	ILPTN#LTTTADQICVDIR	ILPTN(1)LTTTADQICVDIR	494050000	0.141219
gnl|Xelaev18038039m|PAC4GC:7357387|fcgbp.S	KPDCAN#YTNCAFIGK	KPDCAN(1)YTNCAFIGK	491310000	0.140436
gnl|Xelaev18042802m|PAC4GC:7341697|ncstn.S	KIYIPLN#STAPCVR	KIYIPLN(1)STAPCVR	489170000	0.139824
gnl|Xelaev18026574m|PAC4GC:7327150|LOC100485177.L	VSPN#GTLYVADAYQGIFEVNPVTGAVK	VSPN(1)GTLYVADAYQGIFEVNPVTGAVK	475410000	0.135891
gnl|Xelaev18036483m|PAC4GC:7366842|Xelaev18036483m	QGAN#ISDWR	QGAN(1)ISDWR	467350000	0.133587
gnl|Xelaev18039575m|PAC4GC:7347216|serpina3k.L	GN#ATALFILPDEGKLR	GN(1)ATALFILPDEGKLR	466720000	0.133407
gnl|Xelaev18034833m|PAC4GC:7366595|p4ha1.L	DISDGFISN#LTIQR	DISDGFISN(1)LTIQR	466660000	0.13339
gnl|Xelaev18020307m|PAC4GC:7349666|lman2l.S	VFPYISAMVSN#GSVTYDHSR	VFPYISAMVSN(1)GSVTYDHSR	456850000	0.130586
gnl|Xelaev18011668m|PAC4GC:7354639|cpd.L	ITGLYSN#SSDDKVFK	ITGLYSN(1)SSDDKVFK	453550000	0.129643
gnl|Xelaev18020981m|PAC4GC:7349799|sypl1.S	LNVQTFEGIPEHFCN#QTWK	LNVQTFEGIPEHFCN(1)QTWK	442880000	0.126593
gnl|Xelaev18014052m|PAC4GC:7354124|serpinh1.L	AVLSADKLSDEHIHSGLAELLNEVSN#STAR	AVLSADKLSDEHIHSGLAELLNEVSN(1)STAR	429770000	0.122845
gnl|Xelaev18019507m|PAC4GC:7343565|plod3.L	LLSTSKYN#TSR	LLSTSKYN(1)TSR	418380000	0.11959
gnl|Xelaev18040934m|PAC4GC:7346461|gba.L	DFIASDLGPAFAN#SSHK	DFIASDLGPAFAN(1)SSHK	418320000	0.119572
gnl|Xelaev18017384m|PAC4GC:7343473|hsp90b1.L	GVVDSDDLPLN#VSR	GVVDSDDLPLN(1)VSR	418190000	0.119535
gnl|Xelaev18019130m|PAC4GC:7342056|LOC100492966.L	YEDTPQQN#YTTNFEVK	YEDTPQQN(0.999)YTTNFEVK	413180000	0.118103
gnl|Xelaev18018098m|PAC4GC:7343002|LOC100496019-like.L	LTSILYSNQLAN#VTSDEYK	LTSILYSNQLAN(1)VTSDEYK	411560000	0.11764
gnl|Xelaev18014599m|PAC4GC:7352304|gla.S	QMSVALN#R.T	QMSVALN(1)R	406550000	0.116208
gnl|Xelaev18031912m|PAC4GC:7325345|npc1.L	MIAQN#ITDNMDIPEKK	MIAQN(1)ITDNMDIPEKK	403260000	0.115268
gnl|Xelaev18021734m|PAC4GC:7363392|tmem9b.L	KGNIFNKN#VTQK	KGNIFNKN(0.999)VTQK	401540000	0.114776
gnl|Xelaev18012874m|PAC4GC:7355282|gpm6b.L	ALPTN#LTTTADQICVDIR	ALPTN(1)LTTTADQICVDIR	372570000	0.106495
gnl|Xelaev18019023m|PAC4GC:7343278|slc44a2.L	QRN#VTDLLEGAKK	QRN(1)VTDLLEGAKK	367780000	0.105126
gnl|Xelaev18032487m|PAC4GC:7326094|loc100491633.L	MEN#VSSQLVEQDTELQEGHK	MEN(1)VSSQLVEQDTELQEGHK	366020000	0.104623
gnl|Xelaev18019337m|PAC4GC:7343722|zpy1.L	VDFSLKDN#KTLQVR	VDFSLKDN(1)KTLQVR	363450000	0.103888
gnl|Xelaev18038087m|PAC4GC:7347651|atp6ap1.2.L	LN#ESVPSLLVVR	LN(1)ESVPSLLVVR	342750000	0.0979716
gnl|Xelaev18042168m|PAC4GC:7340018|tspan6.S	VLGN#CTEADMIDIVK	VLGN(1)CTEADMIDIVK	342050000	0.0977715
gnl|Xelaev18041346m|PAC4GC:7340739|sel1l.S	EAAIFGEN#ETFPR	EAAIFGEN(1)ETFPR	341990000	0.0977543
gnl|Xelaev18038039m|PAC4GC:7357387|fcgbp.S	DDWPDMN#ATLSR	DDWPDMN(1)ATLSR	338760000	0.0968311
gnl|Xelaev18013345m|PAC4GC:7353944|cd63.L	CCGAFN#STDWK	CCGAFN(1)STDWK	329110000	0.0940727
gnl|Xelaev18037346m|PAC4GC:7356180|siae.S	MN#NTFMAVAMDLGDESSPYGSVHPR	MN(1)NTFMAVAMDLGDESSPYGSVHPR	326810000	0.0934153
gnl|Xelaev18031022m|PAC4GC:7324745|btd.L	GAQIIVFPEDGIHGFN#YTR	GAQIIVFPEDGIHGFN(1)YTR	324370000	0.0927178
gnl|Xelaev18047924m|PAC4GC:7339127|gaa.S	MDN#LTQTDRGYSATLKR	MDN(1)LTQTDRGYSATLKR	323750000	0.0925406
gnl|Xelaev18035589m|PAC4GC:7368039|h6pd.L	DVIQNHLTEILTSLSMEVPLN#YSK	DVIQNHLTEILTSLSMEVPLN(1)YSK	322670000	0.0922319
gnl|Xelaev18037482m|PAC4GC:7356547|h6pd.S	DVIQNHLTEILTSVSMEVPLN#YSK	DVIQNHLTEILTSVSMEVPLN(1)YSK	316720000	0.0905312
gnl|Xelaev18015849m|PAC4GC:7351290|cd63.S	QYPPFN#GTDAVPDSCCK	QYPPFN(1)GTDAVPDSCCK	313840000	0.0897079
gnl|Xelaev18019093m|PAC4GC:7344772|man2b1.L	NVNMQQIN#GSK	NVNMQQIN(1)GSK	313750000	0.0896822
gnl|Xelaev18008052m|PAC4GC:7332841|lnpep.L	EATGTIN#VSSELPWVK	EATGTIN(1)VSSELPWVK	312700000	0.0893821
gnl|Xelaev18017522m|PAC4GC:7345053|gns.L	AFLN#ASAPR	AFLN(1)ASAPR	309690000	0.0885217
gnl|Xelaev18027506m|PAC4GC:7327897|fetub.L	LIADYNKDSN#NTR	LIADYNKDSN(0.966)NTR	306130000	0.0875041
gnl|Xelaev18036681m|PAC4GC:7356953|a2ml1.S	ASNLGEVN#ITVR	ASNLGEVN(1)ITVR	304840000	0.0871354
gnl|Xelaev18039875m|PAC4GC:7346281|sil1.L	MLLYKEN#NTEQYEQK	MLLYKEN(0.998)NTEQYEQK	304790000	0.0871211
gnl|Xelaev18000835m|PAC4GC:7368900|loc100133511.S	YQATPNQN#YTTNFEVK	YQATPNQN(0.996)YTTNFEVK	299390000	0.0855776
gnl|Xelaev18020783m|PAC4GC:7348797|nptn.S	NNSPPAN#ATIEVK	NNSPPAN(1)ATIEVK	299030000	0.0854747
gnl|Xelaev18035290m|PAC4GC:7367556|siae.L	ESYVN#ITYDQK	ESYVN(1)ITYDQK	298900000	0.0854375
gnl|Xelaev18006455m|PAC4GC:7331346|bsg.L	DYTCN#ATNELGSGGDIIHFHVR	DYTCN(1)ATNELGSGGDIIHFHVR	297050000	0.0849087
gnl|Xelaev18008366m|PAC4GC:7329971|ugt3a2.L	MIFN#QTSIMNLLK	MIFN(1)QTSIMNLLK	295820000	0.0845571
gnl|Xelaev18013901m|PAC4GC:7355283|ctsc.L	GSN#ITSYCHETFPGWVHDVLGR	GSN(1)ITSYCHETFPGWVHDVLGR	294430000	0.0841598
gnl|Xelaev18000928m|PAC4GC:7368790|zpy1.S	LLLCLPN#GTMK	LLLCLPN(1)GTMK	287000000	0.082036
gnl|Xelaev18022851m|PAC4GC:7361815|zpd.L	EGIFN#VTMTLYPTSEFK	EGIFN(1)VTMTLYPTSEFK	286010000	0.081753
gnl|Xelaev18017162m|PAC4GC:7343706|p4ha2.L	GFIAN#LTFQR	GFIAN(1)LTFQR	284790000	0.0814043
gnl|Xelaev18040642m|PAC4GC:7346196|ncstn.L	KIYISLN#STSPCVR	KIYISLN(1)STSPCVR	283140000	0.0809327
gnl|Xelaev18034325m|PAC4GC:7367760|Xelaev18034325m	LMPIPSVLGYLN#CTGQLTK	LMPIPSVLGYLN(1)CTGQLTK	281500000	0.0804639
gnl|Xelaev18025781m|PAC4GC:7365672|hyal2.S	LGMYPYYDEHGAPVSGGLPQN#ASLR	LGMYPYYDEHGAPVSGGLPQN(1)ASLR	273980000	0.0783144
gnl|Xelaev18022381m|PAC4GC:7361501|pla2g15.L	VFVITPNKN#YTIK	VFVITPNKN(0.995)YTIK	270790000	0.0774025
gnl|Xelaev18019337m|PAC4GC:7343722|zpy1.L	DRLILN#MTR	DRLILN(1)MTR	270670000	0.0773682
gnl|Xelaev18034910m|PAC4GC:7367992|psap.L	LVSDVQDALRSN#SSFSKK	LVSDVQDALRSN(1)SSFSKK	265720000	0.0759533
gnl|Xelaev18000928m|PAC4GC:7368790|zpy1.S	YFN#VSLGNFFPDVGLK	YFN(1)VSLGNFFPDVGLK	265320000	0.075839
gnl|Xelaev18042802m|PAC4GC:7341697|ncstn.S	MSN#NSWFQSIIK	MSN(1)NSWFQSIIK	263840000	0.075416
gnl|Xelaev18000834m|PAC4GC:7368679|LOC101730883.S	YADTPQQN#YTSNFEVK	YADTPQQN(1)YTSNFEVK	262740000	0.0751015
gnl|Xelaev18036351m|PAC4GC:7366086|ece1.L	NSNSNVIQIDQSGLGLPSMEYYLN#K.T	NSNSNVIQIDQSGLGLPSMEYYLN(1)K.T	261820000	0.0748386
gnl|Xelaev18009936m|PAC4GC:7337270|bsg.S	VLHEDKDTSNVMTYN#VTGLPGDGSGQYTCEFLTTPDVR	VLHEDKDTSNVMTYN(0.961)VTGLPGDGSGQYTCEFLTTPDVR	257950000	0.0737324
gnl|Xelaev18036769m|PAC4GC:7356963|minpp1.S	FLVEVEDN#DTALHEVDKFK	FLVEVEDN(1)DTALHEVDKFK	257790000	0.0736866
gnl|Xelaev18016343m|PAC4GC:7351247|ctsc.S	GSN#VTSYCHETFPGWVHDVLGR	GSN(1)VTSYCHETFPGWVHDVLGR	256200000	0.0732321
gnl|Xelaev18039841m|PAC4GC:7346239|tmem260.L	NLYN#WTEEHGR	NLYN(1)WTEEHGR	255120000	0.0729234
gnl|Xelaev18023008m|PAC4GC:7362158|tm2d1.L	LVHLSINN#ETYRK	LVHLSINN(0.983)ETYRK	254930000	0.0728691
gnl|Xelaev18040642m|PAC4GC:7346196|ncstn.L	MSN#NSWFQSIIK	MSN(1)NSWFQSIIK	253320000	0.0724089
gnl|Xelaev18001839m|PAC4GC:7369391|nup210.L	LPN#GTIYVVEPGYLGFTVHPGDR	LPN(1)GTIYVVEPGYLGFTVHPGDR	252450000	0.0721602
gnl|Xelaev18015133m|PAC4GC:7352175|LOC100485534.S	VAN#ATATEVR	VAN(1)ATATEVR	243590000	0.0696277
gnl|Xelaev18038715m|PAC4GC:7347128|lamp2.L	QNQN#LSDWEASVGSSYMCHK	QNQN(1)LSDWEASVGSSYMCHK	239520000	0.0684643
gnl|Xelaev18037944m|PAC4GC:7356321|ece1.S	QTECITEQYGN#YTVNGEAMNGK	QTECITEQYGN(1)YTVNGEAMNGK	236090000	0.0674839
gnl|Xelaev18035426m|PAC4GC:7367207|hyou1.L	IIPPKEESTQEN#ASNPEPVK	IIPPKEESTQEN(0.996)ASNPEPVK	231250000	0.0661004
gnl|Xelaev18023839m|PAC4GC:7361506|hyal2.L	LGMYPYYDEHGGPVAGGLPQN#ASLR	LGMYPYYDEHGGPVAGGLPQN(1)ASLR	226630000	0.0647799
gnl|Xelaev18037944m|PAC4GC:7356321|ece1.S	N#ASVEAFKR	N(1)ASVEAFKR	225830000	0.0645512
gnl|Xelaev18023008m|PAC4GC:7362158|tm2d1.L	VYGGN#VTTFTGK	VYGGN(1)VTTFTGK	220330000	0.0629791
gnl|Xelaev18024208m|PAC4GC:7365100|slc3a2.S	FLDAENKKN#FSSLGATIK	FLDAENKKN(0.999)FSSLGATIK	217800000	0.0622559
gnl|Xelaev18025810m|PAC4GC:7364070|ptx.S	VDLINTYN#VTEVQITNR	VDLINTYN(1)VTEVQITNR	214880000	0.0614212
gnl|Xelaev18037352m|PAC4GC:7357001|stt3a.S	VMSWWDYGYQITAMAN#R.T	VMSWWDYGYQITAMAN(1)R.T	214880000	0.0614212
gnl|Xelaev18036351m|PAC4GC:7366086|ece1.L	QTECITEQYGN#YTVNGEAVNGK	QTECITEQYGN(1)YTVNGEAVNGK	213300000	0.0609696
gnl|Xelaev18031912m|PAC4GC:7325345|npc1.L	FANAMYN#ACMNVEAPSSNVK	FANAMYN(1)ACMNVEAPSSNVK	209610000	0.0599149
gnl|Xelaev18047924m|PAC4GC:7339127|gaa.S	FNMFGVPMVGADICGFGGN#TTEELCVR	FNMFGVPMVGADICGFGGN(1)TTEELCVR	207850000	0.0594118
gnl|Xelaev18045149m|PAC4GC:7359772|naga.L	IDAETFASWEVDMLKFDGCYSN#STEK	IDAETFASWEVDMLKFDGCYSN(1)STEK	204520000	0.0584599
gnl|Xelaev18017220m|PAC4GC:7344583|pcyox1l.L	VVSSVVHGYLN#SSFFGFPDPK	VVSSVVHGYLN(1)SSFFGFPDPK	203920000	0.0582884
gnl|Xelaev18036684m|PAC4GC:7357531|Xelaev18036684m	IGQWLN#VSLQQGIAELSLPLSSEPPFGEYSIR	IGQWLN(1)VSLQQGIAELSLPLSSEPPFGEYSIR	203870000	0.0582741
gnl|Xelaev18043036m|PAC4GC:7341448|f11r.S	NKSPMQIAPQN#STYTIDPK	NKSPMQIAPQN(1)STYTIDPK	203540000	0.0581798
gnl|Xelaev18026589m|PAC4GC:7328670|tmem87b.L	KTLYN#STNIK	KTLYN(1)STNIK	203170000	0.0580741
gnl|Xelaev18027773m|PAC4GC:7329131|loc100145763.L	EFEGVKDTN#ITIPVVCDIMANNSLGTPYHR	EFEGVKDTN(1)ITIPVVCDIMANNSLGTPYHR	202120000	0.0577739
gnl|Xelaev18028086m|PAC4GC:7328886|zpax.L	EITTPFDAQLTPIIN#ETISTTK	EITTPFDAQLTPIIN(1)ETISTTK	199160000	0.0569278
gnl|Xelaev18008052m|PAC4GC:7332841|lnpep.L	LN#ITTSSK	LN(1)ITTSSK	198000000	0.0565963
gnl|Xelaev18030302m|PAC4GC:7323472|tmem214.S	VSN#YSLQGQSWLER	VSN(1)YSLQGQSWLER	197000000	0.0563104
gnl|Xelaev18016746m|PAC4GC:7342462|ovch1.L	YPLSGN#YSINSVCR	YPLSGN(1)YSINSVCR	194780000	0.0556759
gnl|Xelaev18018585m|PAC4GC:7342876|lman2l.L	VFPYISAMVSN#GSITYDHSR	VFPYISAMVSN(1)GSITYDHSR	194300000	0.0555387
gnl|Xelaev18011589m|PAC4GC:7353219|cxadr.L	NTPAITPDATTGFVPIKN#ASQEYSGTYR	NTPAITPDATTGFVPIKN(1)ASQEYSGTYR	193830000	0.0554043
gnl|Xelaev18034322m|PAC4GC:7366409|ovos2.L	DVHLN#QSK	DVHLN(1)QSK	192870000	0.0551299
gnl|Xelaev18036684m|PAC4GC:7357531|Xelaev18036684m	VN#QTLETDESGLASFK	VN(1)QTLETDESGLASFK	192360000	0.0549841
gnl|Xelaev18045277m|PAC4GC:7359227|sun1.L	ILQN#ISYHVSLTK	ILQN(1)ISYHVSLTK	191320000	0.0546869
gnl|Xelaev18036769m|PAC4GC:7356963|minpp1.S	FPQTPESGLKDLPGMEPVIN#DTLMR	FPQTPESGLKDLPGMEPVIN(1)DTLMR	190550000	0.0544668
gnl|Xelaev18017450m|PAC4GC:7343691|tmtc3.L	AN#ESRLEEADQLYR	AN(1)ESRLEEADQLYR	190290000	0.0543924
gnl|Xelaev18003585m|PAC4GC:7345384|galns.L	ILNLLN#LTGIAK	ILNLLN(1)LTGIAK	189860000	0.0542695
gnl|Xelaev18012631m|PAC4GC:7355421|ppt1.L	FLN#DTMVDPPDTEWFGFYKPGQSK	FLN(1)DTMVDPPDTEWFGFYKPGQSK	189610000	0.0541981
gnl|Xelaev18036483m|PAC4GC:7366842|Xelaev18036483m	ANEFLMPNNVLTPN#STIFGQSWNVK	ANEFLMPNNVLTPN(1)STIFGQSWNVK	188960000	0.0540123
gnl|Xelaev18011668m|PAC4GC:7354639|cpd.L	GIENAVISVAGIDHN#ITTGK	GIENAVISVAGIDHN(1)ITTGK	188340000	0.0538351
gnl|Xelaev18020264m|PAC4GC:7350238|tmed4.S	FTFTSHTPGEHQICLHSN#SSR	FTFTSHTPGEHQICLHSN(1)SSR	184960000	0.0528689
gnl|Xelaev18014599m|PAC4GC:7352304|gla.S	IN#YTEVAEYCNSWR	IN(1)YTEVAEYCNSWR	180190000	0.0515055
gnl|Xelaev18042091m|PAC4GC:7341752|lamp2.S	QNQN#LSTWEASVDSSYMCHK	QNQN(0.999)LSTWEASVDSSYMCHK	178770000	0.0510996
gnl|Xelaev18005070m|PAC4GC:7330830|lrpap1.L	DAN#FSDSELESFKEELKHFETK	DAN(1)FSDSELESFKEELKHFETK	175300000	0.0501077
gnl|Xelaev18021970m|PAC4GC:7362353|rcn1.L	LDPELNSQIHEEN#QSFQQDHEAFLGKDEAK	LDPELNSQIHEEN(0.999)QSFQQDHEAFLGKDEAK	171910000	0.0491387
gnl|Xelaev18021349m|PAC4GC:7348939|tmed9.S	FTFTSHTPGEHQICLHSN#STK	FTFTSHTPGEHQICLHSN(1)STK	170110000	0.0486242
gnl|Xelaev18000936m|PAC4GC:7368550|LOC394444.S	VLIQCFYPRNGN#VSSK	VLIQCFYPRNGN(1)VSSK	165660000	0.0473522
gnl|Xelaev18031912m|PAC4GC:7325345|npc1.L	QSEFLN#VTNTEPYVDPSPQR	QSEFLN(1)VTNTEPYVDPSPQR	164900000	0.047135
gnl|Xelaev18031912m|PAC4GC:7325345|npc1.L	FVEN#YSNPN#LSISFSAER	FVEN(1)YSNPN(0.999)LSISFSAER	161460000	0.0461517
gnl|Xelaev18005720m|PAC4GC:7331279|manba.L	YLFEGGSTAEN#TTK	YLFEGGSTAEN(1)TTK	159560000	0.0456086
gnl|Xelaev18029551m|PAC4GC:7324100|alg3.S	AYMDEVEGVLN#GTYDYTQLK	AYMDEVEGVLN(1)GTYDYTQLK	155830000	0.0445424
gnl|Xelaev18013979m|PAC4GC:7353202|tpp1.L	LPPSTYYN#GSGR	LPPSTYYN(1)GSGR	155530000	0.0444567
gnl|Xelaev18038039m|PAC4GC:7357387|fcgbp.S	ECPIVN#SSSVTQNCYLMSSHEIFR	ECPIVN(0.999)SSSVTQNCYLMSSHEIFR	155270000	0.0443823
gnl|Xelaev18031198m|PAC4GC:7326670|glb1l.L	NILTTTQINN#ITVLELENSPCNSGK	NILTTTQINN(1)ITVLELENSPCNSGK	154920000	0.0442823
gnl|Xelaev18005187m|PAC4GC:7330540|smim20.L	EQATN#RTDVIQEDVQPPGLK	EQATN(1)RTDVIQEDVQPPGLK	154400000	0.0441337
gnl|Xelaev18044625m|PAC4GC:7360674|dpp4.L	FLAYVEFN#DTDVPVIEYSFYGEDSDQYPHTVVIPYPK	FLAYVEFN(1)DTDVPVIEYSFYGEDSDQYPHTVVIPYPK	152670000	0.0436392
gnl|Xelaev18047493m|PAC4GC:7337846|naga.S	FDGCYSN#STEK	FDGCYSN(1)STEK	151100000	0.0431904
gnl|Xelaev18015849m|PAC4GC:7351290|cd63.S	CCGAFN#ATDWK	CCGAFN(1)ATDWK	146020000	0.0417383
gnl|Xelaev18025026m|PAC4GC:7365082|itfg1.S	GGN#FTESTLIVQKPK	GGN(1)FTESTLIVQKPK	142090000	0.040615
gnl|Xelaev18039156m|PAC4GC:7348278|c4a.L	ISAHYTDAPETN#FTAEFEVKPYVLPNFEVK	ISAHYTDAPETN(1)FTAEFEVKPYVLPNFEVK	141880000	0.0405549
gnl|Xelaev18005330m|PAC4GC:7330318|asah1.L	LLAPAYFILGGN#KSEEGCVITR	LLAPAYFILGGN(1)KSEEGCVITR	140310000	0.0401062
gnl|Xelaev18005835m|PAC4GC:7331191|alb-like.2.L	N#VTIADNNICTEYKK	N(1)VTIADNNICTEYKK	136770000	0.0390943
gnl|Xelaev18015585m|PAC4GC:7352498|lamp1.S	NFFPGSSEN#GTK	NFFPGSSEN(1)GTK	134810000	0.0385341
gnl|Xelaev18047924m|PAC4GC:7339127|gaa.S	WGYSTSN#CTR	WGYSTSN(1)CTR	134610000	0.0384769
gnl|Xelaev18018030m|PAC4GC:7344007|nptn.L	IIDGGLMEINN#ATGR	IIDGGLMEINN(1)ATGR	132820000	0.0379652
gnl|Xelaev18030932m|PAC4GC:7326185|gpnmb.L	LTSDSPALIGSN#VTFAVMLQFPR	LTSDSPALIGSN(1)VTFAVMLQFPR	131200000	0.0375022
gnl|Xelaev18039573m|PAC4GC:7348058|serpina6.L	NTN#VTVQMMNR	NTN(1)VTVQMMNR	129400000	0.0369877
gnl|Xelaev18016852m|PAC4GC:7342504|ckap4.L	FTELN#NSLNDGIK	FTELN(0.993)NSLNDGIK	128790000	0.0368133
gnl|Xelaev18029626m|PAC4GC:7322965|tfrc.S	HIIYGTGN#HTVAALMDHLR	HIIYGTGN(1)HTVAALMDHLR	125180000	0.0357814
gnl|Xelaev18031011m|PAC4GC:7325356|cpvl.L	KYSWTEN#FSMLYIDNPVGTGFSFTDDDR	KYSWTEN(1)FSMLYIDNPVGTGFSFTDDDR	122860000	0.0351183
gnl|Xelaev18039575m|PAC4GC:7347216|serpina3k.L	QITEGLSFN#TTEISEEEIHK	QITEGLSFN(1)TTEISEEEIHK	121790000	0.0348124
gnl|Xelaev18015585m|PAC4GC:7352498|lamp1.S	YQVADLVMSYN#LSDK	YQVADLVMSYN(1)LSDK	121780000	0.0348096
gnl|Xelaev18024367m|PAC4GC:7365000|LOC613063.S	N#GTEFAIQYGTGSLSGYLSK	N(1)GTEFAIQYGTGSLSGYLSK	121290000	0.0346695
gnl|Xelaev18004384m|PAC4GC:7363989|colgalt1.S	ISLWVATDHNFDN#TSQILR	ISLWVATDHNFDN(1)TSQILR	116050000	0.0331717
gnl|Xelaev18038039m|PAC4GC:7357387|fcgbp.S	VIFDDLSTSDAISVAQSCAGASNTGN#STNPFYN#ISIR	VIFDDLSTSDAISVAQSCAGASNTGN(0.962)STNPFYN(0.999)ISIR	115830000	0.0331088
gnl|Xelaev18031912m|PAC4GC:7325345|npc1.L	AN#ESIVAMEYYIGER	AN(1)ESIVAMEYYIGER	115770000	0.0330917
gnl|Xelaev18043381m|PAC4GC:7360327|crtap.L	FYN#VTTLQR	FYN(1)VTTLQR	115170000	0.0329202
gnl|Xelaev18006252m|PAC4GC:7332678|tmem259.L	VFLKPSLESVTPASEN#QSQTLSFSDAASK	VFLKPSLESVTPASEN(1)QSQTLSFSDAASK	114580000	0.0327515
gnl|Xelaev18028769m|PAC4GC:7322904|epcam.S	QN#GSQKLPGEVDITDVAYYMEK	QN(1)GSQKLPGEVDITDVAYYMEK	114500000	0.0327286
gnl|Xelaev18034311m|PAC4GC:7367982|pzp.L	HPVYLIDTDGIVN#MTLMTDK	HPVYLIDTDGIVN(1)MTLMTDK	113470000	0.0324342
gnl|Xelaev18025520m|PAC4GC:7365812|edem3.S	LLPAFN#TTSGLPYPR	LLPAFN(1)TTSGLPYPR	113000000	0.0322999
gnl|Xelaev18001839m|PAC4GC:7369391|nup210.L	GVMIGN#GTVTGVVQAVDAESGK	GVMIGN(1)GTVTGVVQAVDAESGK	112310000	0.0321027
gnl|Xelaev18029423m|PAC4GC:7323806|tpbg.S	DLGHLETLDLSN#NSLKR	DLGHLETLDLSN(0.954)NSLKR	112210000	0.0320741
gnl|Xelaev18018534m|PAC4GC:7344576|pcyox1.L	DFTAFLN#TTISETLEK	DFTAFLN(1)TTISETLEK	111760000	0.0319454
gnl|Xelaev18005096m|PAC4GC:7331543|man2b2.L	QYFYSN#ITAK	QYFYSN(1)ITAK	110300000	0.0315281
gnl|Xelaev18017756m|PAC4GC:7342835|sypl1.L	LNVQLFGGIPENFCN#ATWK	LNVQLFGGIPENFCN(0.995)ATWK	110050000	0.0314567
gnl|Xelaev18012575m|PAC4GC:7355154|tmem30b.L	FRNPTSGN#ETLAYLK	FRNPTSGN(0.983)ETLAYLK	108700000	0.0310708
gnl|Xelaev18039875m|PAC4GC:7346281|sil1.L	IVNRFN#SSSSTTEK	IVNRFN(1)SSSSTTEK	108300000	0.0309564
gnl|Xelaev18044383m|PAC4GC:7359133|LOC100036800.L	N#FTDWMN#VTVALFSSSVPK	N(1)FTDWMN(1)VTVALFSSSVPK	107990000	0.0308678
gnl|Xelaev18036482m|PAC4GC:7367937|fcgbp.L	EQEPDN#CTSLIQLENSQR	EQEPDN(1)CTSLIQLENSQR	106580000	0.0304648
gnl|Xelaev18029645m|PAC4GC:7323111|b3gnt5.S	YLINSYNFVN#DSLSVPR	YLINSYNFVN(0.995)DSLSVPR	106450000	0.0304276
gnl|Xelaev18045407m|PAC4GC:7359774|abca3.L	AIMWYHAN#ESGR	AIMWYHAN(1)ESGR	105380000	0.0301218
gnl|Xelaev18030932m|PAC4GC:7326185|gpnmb.L	ASLLYVVTDQIPFYVN#ISQKNDRN#ASDR	ASLLYVVTDQIPFYVN(1)ISQKNDRN(1)ASDR	105320000	0.0301046
gnl|Xelaev18031198m|PAC4GC:7326670|glb1l.L	DKQTAIN#VTGAAGAELDLLVESMGR	DKQTAIN(1)VTGAAGAELDLLVESMGR	104970000	0.0300046
gnl|Xelaev18005098m|PAC4GC:7331742|wfs1.L	FEITVGMPLN#GSK	FEITVGMPLN(1)GSK	104720000	0.0299331
gnl|Xelaev18011668m|PAC4GC:7354639|cpd.L	GLNLNYPHITN#LTSLGQSVEFR	GLNLNYPHITN(1)LTSLGQSVEFR	102930000	0.0294215
gnl|Xelaev18038039m|PAC4GC:7357387|fcgbp.S	N#DSFLLVK	N(1)DSFLLVK	102780000	0.0293786
gnl|Xelaev18027923m|PAC4GC:7328249|atp1b3.L	FTQNKPQSYMEYVQVLNTFLAPYN#DSLQAK	FTQNKPQSYMEYVQVLNTFLAPYN(1)DSLQAK	101330000	0.0289641
gnl|Xelaev18013051m|PAC4GC:7354635|lamp1.L	GVTVDGN#CTN#TTAYLSLSTGSIDLR	GVTVDGN(1)CTN(1)TTAYLSLSTGSIDLR	97617000	0.0279028
gnl|Xelaev18029958m|PAC4GC:7323194|atp1b3.S	ISPSN#FTSEEIAVECK	ISPSN(1)FTSEEIAVECK	97063000	0.0277445
gnl|Xelaev18022638m|PAC4GC:7363959|cdh3.L	IRVNEGGFFN#ITTDPESNQGILTTAK	IRVNEGGFFN(0.988)ITTDPESNQGILTTAK	96758000	0.0276573
gnl|Xelaev18031198m|PAC4GC:7326670|glb1l.L	CGTIQGLYTTVDFGPGSN#ITETFLVQR	CGTIQGLYTTVDFGPGSN(1)ITETFLVQR	95113000	0.0271871
gnl|Xelaev18021021m|PAC4GC:7349464|creld2.S	IMEAENTEVTDGEMGTSASDIN#ISNTAHEDL	IMEAENTEVTDGEMGTSASDIN(1)ISNTAHEDL	95110000	0.0271862
gnl|Xelaev18004029m|PAC4GC:7339833|kiaa1161.S	FN#YSHIEIDDMYSK	FN(1)YSHIEIDDMYSK	93421000	0.0267034
gnl|Xelaev18044127m|PAC4GC:7360896|ogfod3.L	FVFIDESAN#R.T	FVFIDESAN(1)R.T	90186000	0.0257787
gnl|Xelaev18034833m|PAC4GC:7366595|p4ha1.L	ESN#KSSSSLSEGEEVR	ESN(1)KSSSSLSEGEEVR	90167000	0.0257733
gnl|Xelaev18023839m|PAC4GC:7361506|hyal2.L	LFDLNASPNEGFVDQN#LTIFYK	LFDLNASPNEGFVDQN(1)LTIFYK	90163000	0.0257722
gnl|Xelaev18036482m|PAC4GC:7367937|fcgbp.L	N#KTLVTVTMK	N(1)KTLVTVTMK	89562000	0.0256004
gnl|Xelaev18041346m|PAC4GC:7340739|sel1l.S	MYSEGSDSVTQSN#ETALQYFR	MYSEGSDSVTQSN(1)ETALQYFR	88714000	0.025358
gnl|Xelaev18034833m|PAC4GC:7366595|p4ha1.L	RPCN#LSELE	RPCN(1)LSELE	88063000	0.0251719
gnl|Xelaev18034317m|PAC4GC:7367977|m6pr.L	IN#DTHIMSGTDWILLIYGSGDKYDSHCNNEAR	IN(1)DTHIMSGTDWILLIYGSGDKYDSHCNNEAR	87811000	0.0250999
gnl|Xelaev18008052m|PAC4GC:7332841|lnpep.L	FNVN#MTGYYIVDYGADGWDALIEQLHR	FNVN(0.997)MTGYYIVDYGADGWDALIEQLHR	86217000	0.0246442
gnl|Xelaev18019905m|PAC4GC:7348672|ikbip.S	HQLEGN#VTTLQEAVAQIEHSTATISK	HQLEGN(1)VTTLQEAVAQIEHSTATISK	86217000	0.0246442
gnl|Xelaev18038841m|PAC4GC:7346718|tspan6.L	NSFQQGYLQALQQYN#STGDPR	NSFQQGYLQALQQYN(1)STGDPR	84742000	0.0242226
gnl|Xelaev18037944m|PAC4GC:7356321|ece1.S	EQMQEILDFETSLAN#ITIPQEKR	EQMQEILDFETSLAN(1)ITIPQEKR	84527000	0.0241612
gnl|Xelaev18025810m|PAC4GC:7364070|ptx.S	AFGHEISGN#YTNNPSSPDSEEIEEQQAATELR	AFGHEISGN(0.995)YTNNPSSPDSEEIEEQQAATELR	83617000	0.0239011
gnl|Xelaev18026124m|PAC4GC:7329112|epcam.L	RN#NSDSVNDDVLIQALK	RN(0.926)NSDSVNDDVLIQALK	83543000	0.0238799
gnl|Xelaev18045044m|PAC4GC:7359563|itgav.L	AN#TSQPGIIEGGDVIK	AN(1)TSQPGIIEGGDVIK	83516000	0.0238722
gnl|Xelaev18004384m|PAC4GC:7363989|colgalt1.S	MLN#QSN#VTEMGIK	MLN(1)QSN(1)VTEMGIK	82729000	0.0236472
gnl|Xelaev18031912m|PAC4GC:7325345|npc1.L	N#STDFIDAMRK	N(1)STDFIDAMRK	82418000	0.0235583
gnl|Xelaev18022088m|PAC4GC:7361943|muc6.L	KHEVAPAN#FSR	KHEVAPAN(1)FSR	81014000	0.023157
gnl|Xelaev18027923m|PAC4GC:7328249|atp1b3.L	ISPSN#FTSEEISVECK	ISPSN(1)FTSEEISVECK	80295000	0.0229515
gnl|Xelaev18004837m|PAC4GC:7332633|atrn.L	FIN#STQAK	FIN(1)STQAK	80039000	0.0228783
gnl|Xelaev18040983m|PAC4GC:7341895|plxna3.S	LSEN#LTELR	LSEN(1)LTELR	79833000	0.0228194
gnl|Xelaev18019507m|PAC4GC:7343565|plod3.L	YIHEN#YSK	YIHEN(1)YSK	78782000	0.022519
gnl|Xelaev18047423m|PAC4GC:7337437|dnajb11.S	RGDDLYTN#VSISLVEALIGFEMDITHLDGHK	RGDDLYTN(1)VSISLVEALIGFEMDITHLDGHK	77330000	0.022104
gnl|Xelaev18038492m|PAC4GC:7346942|clcn5.L	LCDYVNDYN#NTK	LCDYVNDYN(0.981)NTK	75680000	0.0216324
gnl|Xelaev18038715m|PAC4GC:7347128|lamp2.L	NHFYLEGVN#VTLIN#GSAFSYR	NHFYLEGVN(1)VTLIN(1)GSAFSYR	74703000	0.0213531
gnl|Xelaev18027456m|PAC4GC:7327375|tfrc.L	QSGFVDSPFGHAHYGTGDPYTPGFPSFN#HTQFPPSK	QSGFVDSPFGHAHYGTGDPYTPGFPSFN(1)HTQFPPSK	73902000	0.0211241
gnl|Xelaev18031022m|PAC4GC:7324745|btd.L	HQMPPSVFQAEMMYDN#FTFTPLPAVQGAVK	HQMPPSVFQAEMMYDN(1)FTFTPLPAVQGAVK	73858000	0.0211116
gnl|Xelaev18010023m|PAC4GC:7336856|slc44a1.S	KFAETN#GSALCDYSLTPSQYTTDSR	KFAETN(1)GSALCDYSLTPSQYTTDSR	73414000	0.0209846
gnl|Xelaev18000104m|PAC4GC:7322368|vnn2.L	FIAATYEHAVILPEN#SSIPVTAEK	FIAATYEHAVILPEN(1)SSIPVTAEK	73231000	0.0209323
gnl|Xelaev18027506m|PAC4GC:7327897|fetub.L	LIYYN#CTITTVHPR	LIYYN(1)CTITTVHPR	72814000	0.0208131
gnl|Xelaev18045189m|PAC4GC:7358550|nomo3.L	LEN#MTAGTYSIEAQKEHIYFDTLTVK	LEN(1)MTAGTYSIEAQKEHIYFDTLTVK	72216000	0.0206422
gnl|Xelaev18006393m|PAC4GC:7331358|loc100145428.L	AFENYN#GSKSDLTVDNIQK	AFENYN(0.999)GSKSDLTVDNIQK	72042000	0.0205925
gnl|Xelaev18033465m|PAC4GC:7334702|pign.S	ADTFFELVEN#GTSR	ADTFFELVEN(1)GTSR	70454000	0.0201386
gnl|Xelaev18043979m|PAC4GC:7360078|pigt.L	PLGVAN#ITDHR	PLGVAN(1)ITDHR	70347000	0.020108
gnl|Xelaev18012631m|PAC4GC:7355421|ppt1.L	N#GSIFLADINQER	N(1)GSIFLADINQER	69039000	0.0197341
gnl|Xelaev18020855m|PAC4GC:7349715|calu.S	N#VTYGTYLDDPDPDNSFNYK	N(1)VTYGTYLDDPDPDNSFNYK	68254000	0.0195097
gnl|Xelaev18020783m|PAC4GC:7348797|nptn.S	ETSATPIFLHCN#ITVTSSQGGLER	ETSATPIFLHCN(1)ITVTSSQGGLER	68062000	0.0194548
gnl|Xelaev18027208m|PAC4GC:7328395|ostm1.L	ALCIDLEDAMN#STR	ALCIDLEDAMN(1)STR	67865000	0.0193985
gnl|Xelaev18040642m|PAC4GC:7346196|ncstn.L	ELYSYTWVQGPLDGN#TTSR	ELYSYTWVQGPLDGN(1)TTSR	67596000	0.0193216
gnl|Xelaev18008052m|PAC4GC:7332841|lnpep.L	N#TTQKTN#DTLVSVYAVPDKTDQVK	N(1)TTQKTN(1)DTLVSVYAVPDKTDQVK	67399000	0.0192653
gnl|Xelaev18011330m|PAC4GC:7355205|gpa33.L	VAFTGDPGANNVGITITQLNMQDN#GTYQCEVIIPK	VAFTGDPGANNVGITITQLNMQDN(0.944)GTYQCEVIIPK	66927000	0.0191304
gnl|Xelaev18042889m|PAC4GC:7342011|glmp.S	IFEYQDVN#NTAN#FSGTDEK	IFEYQDVN(0.901)NTAN(0.998)FSGTDEK	66143000	0.0189063
gnl|Xelaev18036952m|PAC4GC:7356784|Xelaev18036952m	AFYN#ATWNER	AFYN(1)ATWNER	64395000	0.0184066
gnl|Xelaev18018098m|PAC4GC:7343002|LOC100496019-like.L	CVGATFPVGN#FSISYVR	CVGATFPVGN(1)FSISYVR	63394000	0.0181205
gnl|Xelaev18015133m|PAC4GC:7352175|LOC100485534.S	QVPAMEN#YTMQER	QVPAMEN(1)YTMQER	62983000	0.018003
gnl|Xelaev18047493m|PAC4GC:7337846|naga.S	GTDGLPRPYSTNLGLLN#VTQCTDGYK	GTDGLPRPYSTNLGLLN(1)VTQCTDGYK	62893000	0.0179773
gnl|Xelaev18000728m|PAC4GC:7368667|slc44a2.S	DGFHN#FTKSPVEVLR	DGFHN(1)FTKSPVEVLR	62082000	0.0177455
gnl|Xelaev18034924m|PAC4GC:7367859|mttp.2.L	ETYVVSESLPEKN#ITYTKR	ETYVVSESLPEKN(1)ITYTKR	60595000	0.0173205
gnl|Xelaev18020826m|PAC4GC:7349100|tspan3.S	NYVFN#CTGSMNKPADLYSEGCK	NYVFN(0.921)CTGSMNKPADLYSEGCK	59603000	0.0170369
gnl|Xelaev18001839m|PAC4GC:7369391|nup210.L	IPKDYFEVLETSLN#GSYHK	IPKDYFEVLETSLN(1)GSYHK	59596000	0.0170349
gnl|Xelaev18037346m|PAC4GC:7356180|siae.S	GAIWYQGEQNTGTNTDLYN#CTFPALIEDWR	GAIWYQGEQNTGTNTDLYN(0.973)CTFPALIEDWR	59242000	0.0169337
gnl|Xelaev18034320m|PAC4GC:7366739|pzp-like.2.L	FTPIIYISEYLN#K.T	FTPIIYISEYLN(1)K.T	58987000	0.0168608
gnl|Xelaev18013068m|PAC4GC:7354975|carkd.L	LSQAMGN#ITIIQK	LSQAMGN(1)ITIIQK	56816000	0.0162403
gnl|Xelaev18000928m|PAC4GC:7368790|zpy1.S	GNN#YSADLVQGSPSR	GNN(0.996)YSADLVQGSPSR	56596000	0.0161774
gnl|Xelaev18045189m|PAC4GC:7358550|nomo3.L	CSLSHAITLEFYQDGNGPEHVGVYN#LSK	CSLSHAITLEFYQDGNGPEHVGVYN(1)LSK	56112000	0.016039
gnl|Xelaev18014180m|PAC4GC:7350700|cpd.S	VTHLLN#GTDVYIVPSLNPDGFEK	VTHLLN(1)GTDVYIVPSLNPDGFEK	55830000	0.0159584
gnl|Xelaev18008274m|PAC4GC:7331821|slc38a9.L	VICPNPDSTGPLN#K.S	VICPNPDSTGPLN(1)K.S	55438000	0.0158464
gnl|Xelaev18025419m|PAC4GC:7364843|hs2st1.S	YHVLHIN#TTK	YHVLHIN(1)TTK	53722000	0.0153559
gnl|Xelaev18018030m|PAC4GC:7344007|nptn.L	NSPPAN#ATIEVK	NSPPAN(1)ATIEVK	53255000	0.0152224
gnl|Xelaev18027990m|PAC4GC:7328274|uggt1-like.L	GNDVN#ATVEGEHDPVDEVQGFLFGK	GNDVN(0.981)ATVEGEHDPVDEVQGFLFGK	53144000	0.0151907
gnl|Xelaev18009785m|PAC4GC:7335237|tmem259.S	VFLKPSLESVTQASEN#QSQTLSFSDATSK	VFLKPSLESVTQASEN(1)QSQTLSFSDATSK	52400000	0.014978
gnl|Xelaev18039841m|PAC4GC:7346239|tmem260.L	NLLFSMPN#DSIILLR	NLLFSMPN(1)DSIILLR	52359000	0.0149663
gnl|Xelaev18036483m|PAC4GC:7366842|Xelaev18036483m	VLYDNVYQIIVNIPSSYSN#K.T	VLYDNVYQIIVNIPSSYSN(1)K.T	51515000	0.014725
gnl|Xelaev18029722m|PAC4GC:7323589|serpini1.S	IRDLFTADDFNN#LTK	IRDLFTADDFNN(0.975)LTK	51289000	0.0146604
gnl|Xelaev18004029m|PAC4GC:7339833|kiaa1161.S	IN#DSVPFHLGWN#STEK	IN(1)DSVPFHLGWN(1)STEK	51239000	0.0146461
gnl|Xelaev18014029m|PAC4GC:7354809|prcp.L	N#ISSHSNIIFSNGGLDPWSAGGVK	N(0.996)ISSHSNIIFSNGGLDPWSAGGVK	50744000	0.0145047
gnl|Xelaev18013152m|PAC4GC:7353291|dct.L	LVTLCN#GTNEGFLQR	LVTLCN(1)GTNEGFLQR	50743000	0.0145044
gnl|Xelaev18001839m|PAC4GC:7369391|nup210.L	KFDN#FSSLAVTWESSR	KFDN(1)FSSLAVTWESSR	50385000	0.014402
gnl|Xelaev18034325m|PAC4GC:7367760|Xelaev18034325m	QGIPYSVSMTLVDALGKPIKN#ETIELR	QGIPYSVSMTLVDALGKPIKN(1)ETIELR	49937000	0.014274
gnl|Xelaev18015149m|PAC4GC:7352591|kiaa0319l.S	VIVNGENSHGEGFVN#VTVNPK	VIVNGENSHGEGFVN(0.992)VTVNPK	49606000	0.0141794
gnl|Xelaev18007846m|PAC4GC:7331559|tctn1.L	ILATPNSGNEIN#ITVQSLTKK	ILATPNSGNEIN(1)ITVQSLTKK	48904000	0.0139787
gnl|Xelaev18019135m|PAC4GC:7344211|LOC101733102.L	LFISNPSLVPDN#R.T	LFISNPSLVPDN(1)R.T	48812000	0.0139524
gnl|Xelaev18020677m|PAC4GC:7349888|adam10.S	N#ISQVLDK	N(1)ISQVLDK	47089000	0.0134599
gnl|Xelaev18019862m|PAC4GC:7350453|cecr1.S	DVDENVLDALLLN#TTR	DVDENVLDALLLN(1)TTR	46367000	0.0132535
gnl|Xelaev18042802m|PAC4GC:7341697|ncstn.S	LN#GTQDLPR	LN(1)GTQDLPR	46065000	0.0131672
gnl|Xelaev18042802m|PAC4GC:7341697|ncstn.S	ELYSYTWVQGPIESN#TTSR	ELYSYTWVQGPIESN(1)TTSR	45965000	0.0131386
gnl|Xelaev18038087m|PAC4GC:7347651|atp6ap1.2.L	QLLATAQPTPDYPPVAFN#SSR	QLLATAQPTPDYPPVAFN(1)SSR	44979000	0.0128568
gnl|Xelaev18000936m|PAC4GC:7368550|LOC394444.S	YEIINQN#GCLVDGK	YEIINQN(0.999)GCLVDGK	44436000	0.0127016
gnl|Xelaev18008192m|PAC4GC:7329986|arsb.L	LYAGMVSVLDEAVAN#VTNALKK	LYAGMVSVLDEAVAN(0.992)VTNALKK	44038000	0.0125878
gnl|Xelaev18020783m|PAC4GC:7348797|nptn.S	MFITSKDN#YTELK	MFITSKDN(1)YTELK	43582000	0.0124575
gnl|Xelaev18035290m|PAC4GC:7367556|siae.L	GAIWYQGEQNTITNTNLYN#CTFPALIEDWR	GAIWYQGEQNTITNTNLYN(1)CTFPALIEDWR	43027000	0.0122988
gnl|Xelaev18031198m|PAC4GC:7326670|glb1l.L	PGVYN#FSGDHDIESFLK	PGVYN(1)FSGDHDIESFLK	42629000	0.0121851
gnl|Xelaev18036690m|PAC4GC:7357006|LOC100036845.S	LAPIPDVLDYLN#NTGQLTDK	LAPIPDVLDYLN(0.975)NTGQLTDK	42352000	0.0121059
gnl|Xelaev18025335m|PAC4GC:7365331|lamc1.S	LLQN#LTAIK	LLQN(1)LTAIK	41440000	0.0118452
gnl|Xelaev18047681m|PAC4GC:7339250|abca3.S	ILAAVVFEHHFN#DSEDPLPLQVR	ILAAVVFEHHFN(1)DSEDPLPLQVR	41405000	0.0118352
gnl|Xelaev18011713m|PAC4GC:7355303|slc46a1.L	LSADIGFN#GTR	LSADIGFN(1)GTR	41061000	0.0117369
gnl|Xelaev18001839m|PAC4GC:7369391|nup210.L	N#LSSDKEESSSLALVEPAISR	N(1)LSSDKEESSSLALVEPAISR	40329000	0.0115276
gnl|Xelaev18035689m|PAC4GC:7367559|p3h1.L	LGQEGKVPLNSALLYYN#VTDK	LGQEGKVPLNSALLYYN(1)VTDK	39689000	0.0113447
gnl|Xelaev18039574m|PAC4GC:7347572|serpina3.L	QINDYVSN#KTDGK	QINDYVSN(1)KTDGK	39473000	0.011283
gnl|Xelaev18000774m|PAC4GC:7368831|Xelaev18000774m	HAEEYGN#ETWGVTK	HAEEYGN(1)ETWGVTK	39321000	0.0112395
gnl|Xelaev18011324m|PAC4GC:7353332|creg1.L	LN#VTNIWVLDYFGGIK	LN(0.996)VTNIWVLDYFGGIK	38868000	0.01111
gnl|Xelaev18036690m|PAC4GC:7357006|LOC100036845.S	LIYKPNANHNLAITSGNDGVGQMTLN#QSNR	LIYKPNANHNLAITSGNDGVGQMTLN(0.961)QSNR	38626000	0.0110408
gnl|Xelaev18036483m|PAC4GC:7366842|Xelaev18036483m	EVCICNPSTGLVCEPTN#CTKDEK	EVCICNPSTGLVCEPTN(1)CTKDEK	37648000	0.0107613
gnl|Xelaev18027456m|PAC4GC:7327375|tfrc.L	AIKELN#LTLK	AIKELN(1)LTLK	37057000	0.0105924
gnl|Xelaev18038039m|PAC4GC:7357387|fcgbp.S	VN#FSSVLIPGK	VN(1)FSSVLIPGK	37026000	0.0105835
gnl|Xelaev18025907m|PAC4GC:7365245|rpn1.S	DEIGN#ISTSHLLILDDSVEMEIRPR	DEIGN(1)ISTSHLLILDDSVEMEIRPR	36659000	0.0104786
gnl|Xelaev18027628m|PAC4GC:7328341|mgam.L	VIIILDPAIAVN#ETKDYPPYRR	VIIILDPAIAVN(1)ETKDYPPYRR	36657000	0.010478
gnl|Xelaev18011668m|PAC4GC:7354639|cpd.L	EAVLVN#FTLVR	EAVLVN(1)FTLVR	36635000	0.0104717
gnl|Xelaev18019337m|PAC4GC:7343722|zpy1.L	GNN#YSVDFIQGSHSR	GNN(0.989)YSVDFIQGSHSR	36461000	0.010422
gnl|Xelaev18026686m|PAC4GC:7327926|igf2r.L	LILEYTN#GSECTDSSGAK	LILEYTN(1)GSECTDSSGAK	36409000	0.0104071
gnl|Xelaev18012630m|PAC4GC:7355824|eef1a1o.L	VETGVLKPGMIVTFAPSN#VTTEVK	VETGVLKPGMIVTFAPSN(1)VTTEVK	35733000	0.0102139
gnl|Xelaev18013990m|PAC4GC:7355224|hpx.L	GDFVWVGSHGPAQLIN#ETWK	GDFVWVGSHGPAQLIN(1)ETWK	35013000	0.0100081
gnl|Xelaev18038039m|PAC4GC:7357387|fcgbp.S	EQLHVWVN#GTQVDIPSVLIQGSVWLN#QSER	EQLHVWVN(1)GTQVDIPSVLIQGSVWLN(1)QSER	34942000	0.00998781
gnl|Xelaev18014761m|PAC4GC:7352968|tspan7.S	N#MTINFTK	N(1)MTINFTK	34934000	0.00998553
gnl|Xelaev18031163m|PAC4GC:7325628|cdcp1.L	VQLEPPGLTGLN#R.T	VQLEPPGLTGLN(1)R.T	34877000	0.00996923
gnl|Xelaev18031018m|PAC4GC:7325308|fkbp14.L	NGDLLLVHAEGFLEKN#GSR	NGDLLLVHAEGFLEKN(1)GSR	34738000	0.0099295
gnl|Xelaev18003710m|PAC4GC:7357670|ms.L	LQSWYDWYN#VTQAGLLPHTYR	LQSWYDWYN(1)VTQAGLLPHTYR	34706000	0.00992035
gnl|Xelaev18047583m|PAC4GC:7338626|sun1.S	ILQN#ITHHVTLTKPIPSTK	ILQN(1)ITHHVTLTKPIPSTK	34646000	0.0099032
gnl|Xelaev18033676m|PAC4GC:7333743|dsc3.S	IN#DTAIYIR	IN(1)DTAIYIR	34590000	0.0098872
gnl|Xelaev18032062m|PAC4GC:7325774|ggh.L	KASN#ISHSSEAVR	KASN(1)ISHSSEAVR	34581000	0.00988462
gnl|Xelaev18014998m|PAC4GC:7351314|c3orf52-like.S	LN#FSMPSANQNER	LN(1)FSMPSANQNER	34036000	0.00972884
gnl|Xelaev18025026m|PAC4GC:7365082|itfg1.S	N#VTADVFGSESYGK	N(1)VTADVFGSESYGK	32861000	0.00939298
gnl|Xelaev18039178m|PAC4GC:7348189|neu1.L	CSVSSLMITN#SSDDGLTWSPPRN#LSHEIGTK	CSVSSLMITN(1)SSDDGLTWSPPRN(1)LSHEIGTK	32514000	0.00929379
gnl|Xelaev18029645m|PAC4GC:7323111|b3gnt5.S	FKDLIQQDFSDTFHN#LTLK	FKDLIQQDFSDTFHN(1)LTLK	32073000	0.00916774
gnl|Xelaev18016406m|PAC4GC:7352145|gdpd5.S	EHN#ATLLLK	EHN(1)ATLLLK	32001000	0.00914716
gnl|Xelaev18044242m|PAC4GC:7360606|arsg.L	NGVTHNFAVESLGGLPLN#ETTLAEVLK	NGVTHNFAVESLGGLPLN(1)ETTLAEVLK	31574000	0.0090251
gnl|Xelaev18045850m|PAC4GC:7338615|atp6v0a1.S	HTSVLQLNPN#VTGVFNGPYPFGIDPIWSLATNK	HTSVLQLNPN(0.992)VTGVFNGPYPFGIDPIWSLATNK	31367000	0.00896594
gnl|Xelaev18007773m|PAC4GC:7332365|tctn2.L	FTATFLN#GSR	FTATFLN(1)GSR	31359000	0.00896365
gnl|Xelaev18011330m|PAC4GC:7355205|gpa33.L	GKN#ATLPCTYQTTADK	GKN(1)ATLPCTYQTTADK	31085000	0.00888533
gnl|Xelaev18032234m|PAC4GC:7325280|cpq.L	N#ISNIDLVMESDIGTFMPLGMQFTGKPEAR	N(0.981)ISNIDLVMESDIGTFMPLGMQFTGKPEAR	30974000	0.0088536
gnl|Xelaev18011732m|PAC4GC:7354474|serpinf2.L	LLANFN#QSDLYSR	LLANFN(0.979)QSDLYSR	30964000	0.00885074
gnl|Xelaev18019023m|PAC4GC:7343278|slc44a2.L	VFN#ETQCDFSGNTCNPETFN#TTN#VTR	VFN(0.994)ETQCDFSGNTCNPETFN(1)TTN(1)VTR	30731000	0.00878414
gnl|Xelaev18011668m|PAC4GC:7354639|cpd.L	LLN#TTDIYIVPSLNPDGFEK	LLN(1)TTDIYIVPSLNPDGFEK	30121000	0.00860978
gnl|Xelaev18027773m|PAC4GC:7329131|loc100145763.L	DTN#ITIPVVCDIMANNSLGTPYHR	DTN(0.995)ITIPVVCDIMANNSLGTPYHR	29821000	0.00852403
gnl|Xelaev18021193m|PAC4GC:7350267|apmap.S	N#GTIYFTDSSSK	N(1)GTIYFTDSSSK	29402000	0.00840426
gnl|Xelaev18030121m|PAC4GC:7323123|apob.S	GLNN#DSLGPLVPR	GLNN(0.905)DSLGPLVPR	29292000	0.00837282
gnl|Xelaev18005848m|PAC4GC:7332448|naaa.L	ALN#ATGQANISADTLYK	ALN(1)ATGQANISADTLYK	28678000	0.00819731
gnl|Xelaev18019056m|PAC4GC:7343575|Xelaev18019056m	YAEEYGN#ETWGVTK	YAEEYGN(1)ETWGVTK	28064000	0.00802181
gnl|Xelaev18005847m|PAC4GC:7330103|MGC69088.L	MTIHTTLMSAAFPEN#YTTVVR	MTIHTTLMSAAFPEN(1)YTTVVR	27854000	0.00796178
gnl|Xelaev18012761m|PAC4GC:7353347|gusb.L	NGN#GSVEDIYVLPVGIR	NGN(1)GSVEDIYVLPVGIR	27454000	0.00784744
gnl|Xelaev18026686m|PAC4GC:7327926|igf2r.L	DYLESNSCN#LTSK	DYLESNSCN(0.983)LTSK	27260000	0.00779199
gnl|Xelaev18028032m|PAC4GC:7326832|adam17.L	GYGVQIEQIIVHKEPEN#VTQGQK	GYGVQIEQIIVHKEPEN(1)VTQGQK	27204000	0.00777598
gnl|Xelaev18039575m|PAC4GC:7347216|serpina3k.L	LGVTDVFSDGSN#LSGITEAPPLR	LGVTDVFSDGSN(1)LSGITEAPPLR	27130000	0.00775483
gnl|Xelaev18025282m|PAC4GC:7365170|gpx7.S	KN#YSVSFPMFSK	KN(1)YSVSFPMFSK	25966000	0.00742211
gnl|Xelaev18000029m|PAC4GC:7324372|plxnb3.L	CLAIEDIAPAN#LSR	CLAIEDIAPAN(1)LSR	24788000	0.0070854
gnl|Xelaev18025009m|PAC4GC:7365363|glg1.S	EIVGN#LTELESEDIQIEALLMR	EIVGN(1)LTELESEDIQIEALLMR	24224000	0.00692418
gnl|Xelaev18027024m|PAC4GC:7326934|Xelaev18027024m	CNPSLLSIIGYN#STSTPGQVK	CNPSLLSIIGYN(1)STSTPGQVK	24034000	0.00686987
gnl|Xelaev18031198m|PAC4GC:7326670|glb1l.L	VN#QSADEHIFSK	VN(1)QSADEHIFSK	23956000	0.00684758
gnl|Xelaev18021199m|PAC4GC:7349032|lemd3.S	CVSDPGSILN#ITSVK	CVSDPGSILN(1)ITSVK	23778000	0.0067967
gnl|Xelaev18027208m|PAC4GC:7328395|ostm1.L	LLAEFAN#HSAALSSCLVSNAR	LLAEFAN(1)HSAALSSCLVSNAR	23668000	0.00676525
gnl|Xelaev18028086m|PAC4GC:7328886|zpax.L	FVFPVN#TCLTTR	FVFPVN(1)TCLTTR	23480000	0.00671152
gnl|Xelaev18005371m|PAC4GC:7331755|enpp6.L	KN#ISFDIGANEDSR	KN(1)ISFDIGANEDSR	23054000	0.00658975
gnl|Xelaev18022638m|PAC4GC:7363959|cdh3.L	HSTN#ISVVNK	HSTN(1)ISVVNK	22850000	0.00653144
gnl|Xelaev18004837m|PAC4GC:7332633|atrn.L	WLSLN#NSVNSVVVR	WLSLN(0.983)NSVNSVVVR	22844000	0.00652972
gnl|Xelaev18041731m|PAC4GC:7341908|plxnb3.S	LLTGDLIN#VTVGDIPCK	LLTGDLIN(1)VTVGDIPCK	22805000	0.00651858
gnl|Xelaev18045407m|PAC4GC:7359774|abca3.L	VQSVTYPN#ATLYK	VQSVTYPN(1)ATLYK	22642000	0.00647198
gnl|Xelaev18034674m|PAC4GC:7367194|Xetrov90017730m.L	NVN#ISTLYR	NVN(1)ISTLYR	22605000	0.00646141
gnl|Xelaev18027628m|PAC4GC:7328341|mgam.L	QMDFTLGQN#FSGLPAVVDK	QMDFTLGQN(1)FSGLPAVVDK	22539000	0.00644254
gnl|Xelaev18034674m|PAC4GC:7367194|Xetrov90017730m.L	FVDTQASGVVKN#ATTAYATK	FVDTQASGVVKN(1)ATTAYATK	22489000	0.00642825
gnl|Xelaev18016744m|PAC4GC:7343881|ergic2.L	GHAHLAALVSHDSYN#FSHR	GHAHLAALVSHDSYN(1)FSHR	22448000	0.00641653
gnl|Xelaev18022890m|PAC4GC:7362312|Xetrov90010843m.L	KDTN#ETALYR	KDTN(1)ETALYR	22376000	0.00639595
gnl|Xelaev18033018m|PAC4GC:7334432|tspan13.S	QLLEVGWN#HTNGAHTDIER	QLLEVGWN(1)HTNGAHTDIER	21942000	0.0062719
gnl|Xelaev18042636m|PAC4GC:7341400|tmem87a.S	ILFQN#STIFIK	ILFQN(1)STIFIK	21814000	0.00623531
gnl|Xelaev18007670m|PAC4GC:7332055|dgcr2.L	VN#GSLATFTTDQELK	VN(1)GSLATFTTDQELK	21386000	0.00611297
gnl|Xelaev18000104m|PAC4GC:7322368|vnn2.L	MTGSGIFSPETLGPYYYNMDTEDGN#LTFSTLSAHPR	MTGSGIFSPETLGPYYYNMDTEDGN(0.997)LTFSTLSAHPR	21002000	0.00600321
gnl|Xelaev18013007m|PAC4GC:7355018|tmem131.L	FTPVQN#QTVSSLLIVR	FTPVQN(1)QTVSSLLIVR	20774000	0.00593803
gnl|Xelaev18045407m|PAC4GC:7359774|abca3.L	ILAAVVFEHHFN#HSDDPLPLQVR	ILAAVVFEHHFN(1)HSDDPLPLQVR	20678000	0.00591059
gnl|Xelaev18039661m|PAC4GC:7347983|ero1a.L	SNFLLYTGN#ETKDKETK	SNFLLYTGN(1)ETKDKETK	20500000	0.00585971
gnl|Xelaev18039478m|PAC4GC:7345719|pomt2.L	LIGNNLHN#ASMPEHLAYGSTITLK	LIGNNLHN(0.952)ASMPEHLAYGSTITLK	20456000	0.00584714
gnl|Xelaev18020783m|PAC4GC:7348797|nptn.S	IINLDITNDPGTYLCN#ASNTIGSDN#TTTILR	IINLDITNDPGTYLCN(0.996)ASNTIGSDN(1)TTTILR	20439000	0.00584228
gnl|Xelaev18024983m|PAC4GC:7364525|adgrg1.S	DAAN#STVLGDKVIGVSVENTK	DAAN(1)STVLGDKVIGVSVENTK	20403000	0.00583199
gnl|Xelaev18029423m|PAC4GC:7323806|tpbg.S	MSN#LSFQGAGSGIIPLKELK	MSN(1)LSFQGAGSGIIPLKELK	19808000	0.00566191
gnl|Xelaev18020230m|PAC4GC:7350226|Xelaev18020230m	AVLAPAGMVQN#GTK	AVLAPAGMVQN(1)GTK	19656000	0.00561847
gnl|Xelaev18036560m|PAC4GC:7367447|b4galt3.L	ELQPLYTN#ISVDIGTNK	ELQPLYTN(1)ISVDIGTNK	19628000	0.00561046
gnl|Xelaev18041262m|PAC4GC:7341817|hhipl1.S	LATPFLN#ISK	LATPFLN(1)ISK	19440000	0.00555672
gnl|Xelaev18034366m|PAC4GC:7367310|lipa.L	GNMIHYN#QTTPPFYNVK	GNMIHYN(0.967)QTTPPFYNVK	19400000	0.00554529
gnl|Xelaev18041619m|PAC4GC:7341066|pomt1.S	LIHVN#TSAALK	LIHVN(1)TSAALK	19398000	0.00554472
gnl|Xelaev18027628m|PAC4GC:7328341|mgam.L	FIILLDPAIAGN#ETKPYPAFTR	FIILLDPAIAGN(1)ETKPYPAFTR	19273000	0.00550899
gnl|Xelaev18021823m|PAC4GC:7363672|cd82.L	LIVTYDYEDGKN#TSSETTWDYIQR	LIVTYDYEDGKN(1)TSSETTWDYIQR	19221000	0.00549413
gnl|Xelaev18017932m|PAC4GC:7342890|calu.L	N#VTYGTYLDDQDPDNSFNYK	N(1)VTYGTYLDDQDPDNSFNYK	18851000	0.00538836
gnl|Xelaev18026686m|PAC4GC:7327926|igf2r.L	WEN#GTSILEYK	WEN(1)GTSILEYK	18582000	0.00531147
gnl|Xelaev18043873m|PAC4GC:7360086|pltp.L	FVEEELEN#ITIPDLSGK	FVEEELEN(1)ITIPDLSGK	18531000	0.0052969
gnl|Xelaev18028915m|PAC4GC:7322532|LOC100216148.S	GGN#ITVLSDPYPR	GGN(1)ITVLSDPYPR	18509000	0.00529061
gnl|Xelaev18012180m|PAC4GC:7354546|c3orf52-like.L	DLLIGEN#TSANLR	DLLIGEN(0.967)TSANLR	18373000	0.00525173
gnl|Xelaev18026686m|PAC4GC:7327926|igf2r.L	ISPSVCPSAQN#VSSCQVK	ISPSVCPSAQN(1)VSSCQVK	18047000	0.00515855
gnl|Xelaev18012538m|PAC4GC:7355237|tor2a.L	GWIQGN#LTACGR	GWIQGN(1)LTACGR	17931000	0.00512539
gnl|Xelaev18044492m|PAC4GC:7359521|abcb6.L	LGSYCEHN#GSISQAWLDR	LGSYCEHN(1)GSISQAWLDR	17497000	0.00500134
gnl|Xelaev18028428m|PAC4GC:7327916|pigx.L	HHN#LTEVLLLTAVDVEAPEYLSK	HHN(1)LTEVLLLTAVDVEAPEYLSK	17465000	0.00499219
gnl|Xelaev18041346m|PAC4GC:7340739|sel1l.S	ILN#ESSKR	ILN(1)ESSKR	17413000	0.00497733
gnl|Xelaev18018966m|PAC4GC:7342623|colgalt1.L	ISLWVATDHNLDN#TTEILR	ISLWVATDHNLDN(0.999)TTEILR	17408000	0.0049759
gnl|Xelaev18006640m|PAC4GC:7331321|plpp2.L	GNYAN#VTDSR	GNYAN(1)VTDSR	17290000	0.00494217
gnl|Xelaev18038039m|PAC4GC:7357387|fcgbp.S	NVSSGGN#QTLN#NTVNVIPR	NVSSGGN(1)QTLN(0.916)NTVNVIPR	16628000	0.00475294
gnl|Xelaev18011668m|PAC4GC:7354639|cpd.L	LLAPGLYN#ITASGAGYLTETLVDVDVK	LLAPGLYN(1)ITASGAGYLTETLVDVDVK	16527000	0.00472407
gnl|Xelaev18031018m|PAC4GC:7325308|fkbp14.L	HGTDVN#ETHHEVLVESIFEKEDEDSDGFISAR	HGTDVN(1)ETHHEVLVESIFEKEDEDSDGFISAR	16306000	0.0046609
gnl|Xelaev18036961m|PAC4GC:7356309|Xetrov90017730m.S	KVSTSGIDTIN#FTDFK	KVSTSGIDTIN(1)FTDFK	16148000	0.00461574
gnl|Xelaev18037352m|PAC4GC:7357001|stt3a.S	TILVDNNTWN#NTHISR	TILVDNNTWN(0.918)NTHISR	16106000	0.00460373
gnl|Xelaev18017855m|PAC4GC:7342110|tmem110l.L	ILTN#MTDIIR	ILTN(1)MTDIIR	15958000	0.00456143
gnl|Xelaev18045036m|PAC4GC:7359163|pgap1.L	ESN#ESFFLFPLLDKR	ESN(1)ESFFLFPLLDKR	15715000	0.00449197
gnl|Xelaev18023296m|PAC4GC:7362911|cnn3.L	AVSQPADN#STISLQMGTNK	AVSQPADN(1)STISLQMGTNK	15466000	0.0044208
gnl|Xelaev18045586m|PAC4GC:7359321|tmem8a.L	LQLQN#CTSDNAR	LQLQN(1)CTSDNAR	15407000	0.00440393
gnl|Xelaev18026686m|PAC4GC:7327926|igf2r.L	LSYYDGILQLHYTN#GTPYQDPGKTPR	LSYYDGILQLHYTN(1)GTPYQDPGKTPR	14503000	0.00414553
gnl|Xelaev18036483m|PAC4GC:7366842|Xelaev18036483m	FCGLLIN#TSGPFR	FCGLLIN(1)TSGPFR	14488000	0.00414125
gnl|Xelaev18004029m|PAC4GC:7339833|kiaa1161.S	VGYQSQN#ISCFFR	VGYQSQN(1)ISCFFR	14486000	0.00414067
gnl|Xelaev18014398m|PAC4GC:7352508|gpa33.S	DGSDLTLKN#ISADTSGYYICVSK	DGSDLTLKN(1)ISADTSGYYICVSK	14291000	0.00408494
gnl|Xelaev18022294m|PAC4GC:7362383|b4gat1.L	VVNYAGN#ASYPNNLLR	VVNYAGN(1)ASYPNNLLR	14175000	0.00405178
gnl|Xelaev18007449m|PAC4GC:7331350|plbd2.L	IHLNPFGFLFFQIGGDLEDLEPALN#KSEPK	IHLNPFGFLFFQIGGDLEDLEPALN(1)KSEPK	13587000	0.0038837
gnl|Xelaev18013452m|PAC4GC:7355393|os9.L	YHSQMYVN#GSK	YHSQMYVN(1)GSK	13275000	0.00379452
gnl|Xelaev18037374m|PAC4GC:7357540|cadm1.S	FQLVN#FSSNELR	FQLVN(0.998)FSSNELR	13260000	0.00379023
gnl|Xelaev18018855m|PAC4GC:7342397|Xetrov90009468m.L	LHHVTADGQN#ATFTFTNVAPMTK	LHHVTADGQN(0.997)ATFTFTNVAPMTK	13187000	0.00376937
gnl|Xelaev18008792m|PAC4GC:7337120|atrn.S	DLDMFIN#ASK	DLDMFIN(1)ASK	12945000	0.0037002
gnl|Xelaev18033465m|PAC4GC:7334702|pign.S	GWKENPVEFDSVFN#ESK	GWKENPVEFDSVFN(1)ESK	12805000	0.00366018
gnl|Xelaev18039444m|PAC4GC:7345960|npc2.L	GDVYTIN#TTFVSNVNSK	GDVYTIN(1)TTFVSNVNSK	12805000	0.00366018
gnl|Xelaev18034322m|PAC4GC:7366409|ovos2.L	MAPIPYVLEYLN#NTNQLTDELLQTAVQFLNEGYYR	MAPIPYVLEYLN(0.928)NTNQLTDELLQTAVQFLNEGYYR	12731000	0.00363903
gnl|Xelaev18043872m|PAC4GC:7361008|ctsa.L	EFSN#LSFLTIK	EFSN(1)LSFLTIK	12576000	0.00359472
gnl|Xelaev18000631m|PAC4GC:7345237|Xetrov90027117m.S	IYVDLVSESN#CSMPLVPR	IYVDLVSESN(1)CSMPLVPR	12514000	0.003577
gnl|Xelaev18017896m|PAC4GC:7343217|loc100127794.L	MICGECMNFTQN#TTEK	MICGECMNFTQN(0.999)TTEK	12497000	0.00357214
gnl|Xelaev18043873m|PAC4GC:7360086|pltp.L	ITN#MTCDASIER	ITN(1)MTCDASIER	12401000	0.0035447
gnl|Xelaev18039299m|PAC4GC:7347040|pld3.L	DWNSN#YSLTFNTLSSWK	DWNSN(0.968)YSLTFNTLSSWK	12348000	0.00352955
gnl|Xelaev18013029m|PAC4GC:7355118|slc9a7.L	AFTTILVN#VSGK	AFTTILVN(1)VSGK	12278000	0.00350954
gnl|Xelaev18026686m|PAC4GC:7327926|igf2r.L	CFVNN#GTSLIDLTPLIK	CFVNN(0.908)GTSLIDLTPLIK	12237000	0.00349782
gnl|Xelaev18022851m|PAC4GC:7361815|zpd.L	FVMQMFHFIN#YSEVYLHCK	FVMQMFHFIN(1)YSEVYLHCK	12050000	0.00344437
gnl|Xelaev18018758m|PAC4GC:7342144|bmp1.L	IILN#FTSLDLYR	IILN(1)FTSLDLYR	12045000	0.00344294
gnl|Xelaev18015585m|PAC4GC:7352498|lamp1.S	DGKTN#LTCILADLSIN#FTVPYSN#ASKQELAK	DGKTN(1)LTCILADLSIN(1)FTVPYSN(1)ASKQELAK	11812000	0.00337634
gnl|Xelaev18001778m|PAC4GC:7369393|il17rd.L	NTGLPN#VTLR	NTGLPN(1)VTLR	11728000	0.00335233
gnl|Xelaev18036216m|PAC4GC:7367492|loc100492168.L	ENVN#QTVCQGSSWTR	ENVN(1)QTVCQGSSWTR	11723000	0.0033509
gnl|Xelaev18047818m|PAC4GC:7337845|tmem8a.S	LQLQN#CTLDTTRVPCPLLVTVGSISELPSAQR	LQLQN(1)CTLDTTRVPCPLLVTVGSISELPSAQR	11697000	0.00334347
gnl|Xelaev18013548m|PAC4GC:7353827|itga5.L	NNEHLLILPCAYEMEN#QTR	NNEHLLILPCAYEMEN(1)QTR	11564000	0.00330545
gnl|Xelaev18042392m|PAC4GC:7341736|LOC100492536.S	YTEYQIGN#MSLIITVPHGGSLQPSSIPSR	YTEYQIGN(1)MSLIITVPHGGSLQPSSIPSR	11543000	0.00329945
gnl|Xelaev18043272m|PAC4GC:7361191|itga3.L	VWN#STFLEDYR	VWN(1)STFLEDYR	11186000	0.0031974
gnl|Xelaev18041731m|PAC4GC:7341908|plxnb3.S	LSN#ITDIIFQTIDPGDNQFVAANDPK	LSN(1)ITDIIFQTIDPGDNQFVAANDPK	11166000	0.00319169
gnl|Xelaev18010106m|PAC4GC:7336970|tmem2.S	YPSN#LTVSIAR	YPSN(1)LTVSIAR	10912000	0.00311908
gnl|Xelaev18031011m|PAC4GC:7325356|cpvl.L	KSIHVGN#LTFHDGSEVEKHLLSDVMK	KSIHVGN(1)LTFHDGSEVEKHLLSDVMK	10878000	0.00310936
gnl|Xelaev18024426m|PAC4GC:7364611|ovch2.S	LNFFSDFHEN#R.T	LNFFSDFHEN(1)R.T	10714000	0.00306249
gnl|Xelaev18045147m|PAC4GC:7359340|txndc11.L	NTDLSDSDSVTGTLSSELTKEN#TTE	NTDLSDSDSVTGTLSSELTKEN(1)TTE	10701000	0.00305877
gnl|Xelaev18036687m|PAC4GC:7357478|m6pr.S	IN#DTHIISGTDWILLIYGSGDKYDTHCNSEAR	IN(1)DTHIISGTDWILLIYGSGDKYDTHCNSEAR	10699000	0.0030582
gnl|Xelaev18032321m|PAC4GC:7326086|mal2.L	KGN#TTVINLDNR	KGN(1)TTVINLDNR	10307000	0.00294615
gnl|Xelaev18045036m|PAC4GC:7359163|pgap1.L	N#ITMLSVAGGYSDYQVR	N(1)ITMLSVAGGYSDYQVR	10260000	0.00293272
gnl|Xelaev18038039m|PAC4GC:7357387|fcgbp.S	VYGYTLSLSTEAQGILIN#GTAQPNQIDLENGK	VYGYTLSLSTEAQGILIN(0.999)GTAQPNQIDLENGK	10257000	0.00293186
gnl|Xelaev18003336m|PAC4GC:7361385|gpr107.L	HDMPLVSISEKTEEPPKN#DSTAEQPAPLPAK	HDMPLVSISEKTEEPPKN(1)DSTAEQPAPLPAK	10237000	0.00292614
gnl|Xelaev18027035m|PAC4GC:7327300|fuca2.L	RDLVGELALAIKN#TTK	RDLVGELALAIKN(1)TTK	10176000	0.00290871
gnl|Xelaev18042899m|PAC4GC:7341051|LOC100486704.S	IYIIHQAGN#STFNR	IYIIHQAGN(0.951)STFNR	10031000	0.00286726
gnl|Xelaev18011668m|PAC4GC:7354639|cpd.L	DLDCDFISN#SSGPVGER	DLDCDFISN(1)SSGPVGER	9865300	0.00281989
gnl|Xelaev18039574m|PAC4GC:7347572|serpina3.L	NN#ASMLLIVPELGK	NN(1)ASMLLIVPELGK	9688900	0.00276947
gnl|Xelaev18007719m|PAC4GC:7331566|LOC100495295.L	FCGSNSPLN#K.T	FCGSNSPLN(0.997)K.T	9636500	0.00275449
gnl|Xelaev18035255m|PAC4GC:7367127|st14.L	IIN#QTECNKLLDGQLTPR	IIN(0.947)QTECNKLLDGQLTPR	9528500	0.00272362
gnl|Xelaev18013904m|PAC4GC:7354377|folh1.L	LLEYNVSFEPLFSAAAN#FTESVK	LLEYNVSFEPLFSAAAN(1)FTESVK	9511400	0.00271874
gnl|Xelaev18007449m|PAC4GC:7331350|plbd2.L	TGYWASYNVPYFPEVFN#ASGLPALVEK	TGYWASYNVPYFPEVFN(1)ASGLPALVEK	9463000	0.0027049
gnl|Xelaev18002132m|PAC4GC:7357889|tmem30a.L	DATYPALAPGN#YSLHIEYNYPVLSFDGR	DATYPALAPGN(0.999)YSLHIEYNYPVLSFDGR	9423100	0.0026935
gnl|Xelaev18047493m|PAC4GC:7337846|naga.S	LGIYSDMGN#YTCGGYPGTTLDTIK	LGIYSDMGN(1)YTCGGYPGTTLDTIK	9354500	0.00267389
gnl|Xelaev18019337m|PAC4GC:7343722|zpy1.L	TVPENHYFN#VSLGNFFPDVGLK	TVPENHYFN(0.999)VSLGNFFPDVGLK	9257900	0.00264628
gnl|Xelaev18041377m|PAC4GC:7340238|npc2.S	RGDTYTIN#ATFISNVNSK	RGDTYTIN(1)ATFISNVNSK	9222900	0.00263627
gnl|Xelaev18025354m|PAC4GC:7365131|tor1aip2.S	AYATSLN#SSWNLIDGPSK	AYATSLN(1)SSWNLIDGPSK	9073100	0.00259345
gnl|Xelaev18011473m|PAC4GC:7355155|LOC100486197-like.L	MEYDKLDLLN#R.T	MEYDKLDLLN(1)R	9056100	0.00258859
gnl|Xelaev18003043m|PAC4GC:7357934|il17rd.S	NVN#VTQQGINMQVSFDHAPQNFGFK	NVN(0.927)VTQQGINMQVSFDHAPQNFGFK	8937500	0.00255469
gnl|Xelaev18017220m|PAC4GC:7344583|pcyox1l.L	LFPFSSILSVESPDSSFHSLESLCPVN#VSVGFR	LFPFSSILSVESPDSSFHSLESLCPVN(1)VSVGFR	8765100	0.00250541
gnl|Xelaev18026686m|PAC4GC:7327926|igf2r.L	NGILSLDDGVNVN#LTDIYFK	NGILSLDDGVNVN(0.934)LTDIYFK	8728000	0.00249481
gnl|Xelaev18016340m|PAC4GC:7350768|tyr.S	ILCN#GTAEGPLLR	ILCN(1)GTAEGPLLR	8652000	0.00247309
gnl|Xelaev18018966m|PAC4GC:7342623|colgalt1.L	GPPLN#LSSFVTIPEKVPDK	GPPLN(1)LSSFVTIPEKVPDK	8648600	0.00247211
gnl|Xelaev18018810m|PAC4GC:7343549|fgfr1.L	YGTLN#HTYQLDVVER	YGTLN(1)HTYQLDVVER	8509200	0.00243227
gnl|Xelaev18038069m|PAC4GC:7356721|b4galt3.S	ELQPLYTN#ITVDIGTDK	ELQPLYTN(1)ITVDIGTDK	8357400	0.00238888
gnl|Xelaev18033345m|PAC4GC:7333425|slc39a6.S	YGENN#QTLTLSGFR	YGENN(0.901)QTLTLSGFR	8349300	0.00238656
gnl|Xelaev18012575m|PAC4GC:7355154|tmem30b.L	IESGN#FTTGLPPGEYR	IESGN(1)FTTGLPPGEYR	8086400	0.00231141
gnl|Xelaev18013051m|PAC4GC:7354635|lamp1.L	YEVAELVMSYN#LSDK	YEVAELVMSYN(1)LSDK	7868300	0.00224907
gnl|Xelaev18030727m|PAC4GC:7325118|itgb1.L	LINPCTSDQN#CTSPFSYK	LINPCTSDQN(1)CTSPFSYK	7835200	0.00223961
gnl|Xelaev18020602m|PAC4GC:7348884|sppl2a.S	EGLPFLADN#RSDYK	EGLPFLADN(1)RSDYK	7800900	0.00222981
gnl|Xelaev18020782m|PAC4GC:7349890|cd276.S	GN#MSVLLQQVR	GN(1)MSVLLQQVR	7710900	0.00220408
gnl|Xelaev18026614m|PAC4GC:7328494|LOC100135146.L	IYN#ATNWVTTSLK	IYN(1)ATNWVTTSLK	7521100	0.00214983
gnl|Xelaev18005330m|PAC4GC:7330318|asah1.L	N#GTWYVLETNYDHWK	N(1)GTWYVLETNYDHWK	7386000	0.00211121
gnl|Xelaev18020849m|PAC4GC:7348563|lmf2.S	ETWTEIEFMYKPGN#ISTTPPVIIPHQPR	ETWTEIEFMYKPGN(1)ISTTPPVIIPHQPR	6897200	0.00197149
gnl|Xelaev18037346m|PAC4GC:7356180|siae.S	DITDLALHDILFGDVWLCGGQSNMEMTVSQVFN#ASK	DITDLALHDILFGDVWLCGGQSNMEMTVSQVFN(1)ASK	6753300	0.00193036
gnl|Xelaev18017372m|PAC4GC:7343121|gnptab.L	VPMLILDPSLPAN#TTLK	VPMLILDPSLPAN(1)TTLK	6724200	0.00192204
gnl|Xelaev18014180m|PAC4GC:7350700|cpd.S	EAALVN#FTLVR	EAALVN(1)FTLVR	6705200	0.00191661
gnl|Xelaev18033676m|PAC4GC:7333743|dsc3.S	HQHN#VTIIGVDQSGK	HQHN(1)VTIIGVDQSGK	6690900	0.00191253
gnl|Xelaev18007805m|PAC4GC:7332809|clip1.L	YEILN#SSNSLLDQEKK	YEILN(0.999)SSNSLLDQEKK	6631200	0.00189546
gnl|Xelaev18034674m|PAC4GC:7367194|Xetrov90017730m.L	INNTLN#KCGAKCSSAK	INNTLN(1)KCGAKCSSAK	6589100	0.00188343
gnl|Xelaev18024983m|PAC4GC:7364525|adgrg1.S	FVFPHQNWN#STK	FVFPHQNWN(0.973)STK	6511400	0.00186122
gnl|Xelaev18044931m|PAC4GC:7360617|slc39a10.L	DLQIGLN#STR	DLQIGLN(1)STR	6428100	0.00183741
gnl|Xelaev18013904m|PAC4GC:7354377|folh1.L	AVAYINADSSVEGN#YTLR	AVAYINADSSVEGN(1)YTLR	6374600	0.00182211
gnl|Xelaev18034980m|PAC4GC:7367034|LOC100496372.L	IYLDLVSHSN#CSMPLIPR	IYLDLVSHSN(1)CSMPLIPR	6327100	0.00180854
gnl|Xelaev18028661m|PAC4GC:7322601|mia3-like.1.S	VTFPEAIQLLTSLLN#TTK	VTFPEAIQLLTSLLN(1)TTK	6324100	0.00180768
gnl|Xelaev18012313m|PAC4GC:7353935|c4bpa.L	CFN#NTTIVGDSSR	CFN(0.961)NTTIVGDSSR	5919700	0.00169209
gnl|Xelaev18035290m|PAC4GC:7367556|siae.L	DVTDLALHDLLFGDVWLCGGQSNMEMTVSQVFN#ASK	DVTDLALHDLLFGDVWLCGGQSNMEMTVSQVFN(1)ASK	5781600	0.00165261
gnl|Xelaev18026427m|PAC4GC:7328799|ptk7.L	FEVFPN#GTLK	FEVFPN(1)GTLK	5531400	0.00158109
gnl|Xelaev18025335m|PAC4GC:7365331|lamc1.S	FLGNQGASYGQN#LTFSFR	FLGNQGASYGQN(0.999)LTFSFR	5463900	0.0015618
gnl|Xelaev18024294m|PAC4GC:7364253|LOC100494280.S	DHCSLN#DTGSTFR	DHCSLN(1)DTGSTFR	5314800	0.00151918
gnl|Xelaev18036938m|PAC4GC:7357546|sema4g.S	GAIFSLN#SSNISQR	GAIFSLN(1)SSNISQR	4718600	0.00134876
gnl|Xelaev18018502m|PAC4GC:7343075|erlin2.L	N#FTADYDKALIFNK	N(1)FTADYDKALIFNK	4572900	0.00130712
gnl|Xelaev18019788m|PAC4GC:7350427|creb3l2.S	AFSLSN#DSSSDMPVR	AFSLSN(1)DSSSDMPVR	4346100	0.00124229
gnl|Xelaev18007399m|PAC4GC:7330880|zp3.2.L	APANSFYYQCN#STSVSLAVR	APANSFYYQCN(1)STSVSLAVR	3885400	0.0011106
gnl|Xelaev18027208m|PAC4GC:7328395|ostm1.L	EPPVVTQQGN#YSSVCR	EPPVVTQQGN(1)YSSVCR	3835500	0.00109634
gnl|Xelaev18023248m|PAC4GC:7361827|Xelaev18023248m	MQILVN#LTHDRLPK	MQILVN(1)LTHDRLPK	3768700	0.00107724
gnl|Xelaev18009425m|PAC4GC:7336561|mttp.1.S	EHFEPQN#LSK	EHFEPQN(1)LSK	3761000	0.00107504
gnl|Xelaev18017419m|PAC4GC:7345043|tmpo.L	GAAGRPLN#ATDLK	GAAGRPLN(1)ATDLK	3739300	0.00106884
gnl|Xelaev18009521m|PAC4GC:7335535|scarb2.S	MN#TTDDGEYVFLSGK	MN(1)TTDDGEYVFLSGK	3661100	0.00104649
gnl|Xelaev18007075m|PAC4GC:7331294|LOC100135349.L	AQHENIN#ATLDLLCIINNFYHGQIK	AQHENIN(0.924)ATLDLLCIINNFYHGQIK	3653700	0.00104437
gnl|Xelaev18043548m|PAC4GC:7361289|ctsz.L	NVN#GTNYVSTTR	NVN(0.999)GTNYVSTTR	3626900	0.00103671
gnl|Xelaev18026887m|PAC4GC:7327558|b3galnt2.L	LLN#ITNPTLK	LLN(0.998)ITNPTLK	3462400	0.000989692
gnl|Xelaev18032868m|PAC4GC:7334161|itgb1.S	LLNPCTNDQN#CTSPFSYK	LLNPCTNDQN(0.985)CTSPFSYK	3185100	0.000910428
gnl|Xelaev18039574m|PAC4GC:7347572|serpina3.L	FSVDDN#TTVEVQMMYK	FSVDDN(1)TTVEVQMMYK	2909400	0.000831622
gnl|Xelaev18018586m|PAC4GC:7345017|cnnm2.L	EDSGQLLAFTEYSPGSQDN#R.S	EDSGQLLAFTEYSPGSQDN(1)R.S	2775000	0.000793205
gnl|Xelaev18017372m|PAC4GC:7343121|gnptab.L	IHQLPLSLQDLTGLEQMLIN#CSK	IHQLPLSLQDLTGLEQMLIN(1)CSK	2760500	0.000789061
gnl|Xelaev18036690m|PAC4GC:7357006|LOC100036845.S	FN#VSAVYTYGQPVPGR	FN(1)VSAVYTYGQPVPGR	2276100	0.0006506
gnl|Xelaev18001459m|PAC4GC:7358208|LOC101734509.1.L	LN#VTPFDPSILDSAILISVTGAK	LN(1)VTPFDPSILDSAILISVTGAK	1482400	0.000423729
gnl|Xelaev18040983m|PAC4GC:7341895|plxna3.S	VN#STEGCPEIIPTGEILIPVGVVQPITLK	VN(1)STEGCPEIIPTGEILIPVGVVQPITLK	905450	0.000258814

## Sheet: Stage 41
Protein	N-glycosylation Sites (N#)	N-glycosylation Probabilities /Deamidation Probablities	Intensity	Relative Intensity (%)
gnl|Xelaev18000008m|PAC4GC:7337391|bpi.S	ESSMHLN#TSSFGILIPSISK	ESSMHLN(1)TSSFGILIPSISK	58470000	0.0163203
gnl|Xelaev18000029m|PAC4GC:7324372|plxnb3.L	CLAIEDIAPAN#LSR	CLAIEDIAPAN(1)LSR	14424000	0.00402606
gnl|Xelaev18000029m|PAC4GC:7324372|plxnb3.L	EN#FTYIKNPTFKPLNR	EN(0.997)FTYIKNPTFKPLNR	7876800	0.00219859
gnl|Xelaev18000053m|PAC4GC:7345160|tmem132a.L	AAPGEESVPTSHGNVAQSHN#ETFIVTR	AAPGEESVPTSHGNVAQSHN(0.999)ETFIVTR	51114000	0.014267
gnl|Xelaev18000065m|PAC4GC:7358019|mcam.S	N#ITVLYPSR	N(1)ITVLYPSR	392550000	0.109569
gnl|Xelaev18000104m|PAC4GC:7322368|vnn2.L	FIAATYEHAVILPEN#SSIPVTAEK	FIAATYEHAVILPEN(1)SSIPVTAEK	94704000	0.026434
gnl|Xelaev18000124m|PAC4GC:7337404|frem3.L	YGLLVN#GTAAPQR	YGLLVN(1)GTAAPQR	329710000	0.0920293
gnl|Xelaev18000124m|PAC4GC:7337404|frem3.L	HGFLVNMDHGN#GSIR	HGFLVNMDHGN(0.997)GSIR	67054000	0.0187163
gnl|Xelaev18000124m|PAC4GC:7337404|frem3.L	DGDN#ATGDIFHFSVEDTGGNK	DGDN(1)ATGDIFHFSVEDTGGNK	6195100	0.00172919
gnl|Xelaev18000124m|PAC4GC:7337404|frem3.L	YYDYDKTGSICSAENIN#DTLTQYR	YYDYDKTGSICSAENIN(0.961)DTLTQYR	4145700	0.00115716
gnl|Xelaev18000124m|PAC4GC:7337404|frem3.L	QQDSFN#LTLSDLSDEWVVGGNK	QQDSFN(1)LTLSDLSDEWVVGGNK	2089800	0.000583309
gnl|Xelaev18000299m|PAC4GC:7345392|Xelaev18000299m	MTNALDTTN#LLSLK	MTNALDTTN(1)LLSLK	429350000	0.119841
gnl|Xelaev18000728m|PAC4GC:7368667|slc44a2.S	QRN#VTDLVEGAKK	QRN(1)VTDLVEGAKK	220420000	0.0615241
gnl|Xelaev18000742m|PAC4GC:7368707|yipf2.S	QPEISDPVVPVAN#TTAQK	QPEISDPVVPVAN(1)TTAQK	3058400	0.000853667
gnl|Xelaev18000751m|PAC4GC:7368895|tspan16.S	YLHNDYGESNELTTIWN#ATMK	YLHNDYGESNELTTIWN(1)ATMK	14287000	0.00398782
gnl|Xelaev18000774m|PAC4GC:7368831|Xelaev18000774m	HAEEYGN#ETWGVTK	HAEEYGN(1)ETWGVTK	119890000	0.0334639
gnl|Xelaev18000799m|PAC4GC:7368674|rtbdn.S	LTN#ETIPR	LTN(1)ETIPR	290850000	0.0811827
gnl|Xelaev18000848m|PAC4GC:7368901|ache.S	LLN#ITDNIDEAER	LLN(1)ITDNIDEAER	101720000	0.0283923
gnl|Xelaev18000848m|PAC4GC:7368901|ache.S	IGN#DTELLNCLR	IGN(1)DTELLNCLR	61598000	0.0171934
gnl|Xelaev18000869m|PAC4GC:7368765|gal3st4-like.2.S	YSHYFN#ASLVK	YSHYFN(1)ASLVK	27447000	0.00766106
gnl|Xelaev18000974m|PAC4GC:7368797|Xelaev18000974m	IYFYGHYELN#GTK	IYFYGHYELN(1)GTK	3776100	0.00105399
gnl|Xelaev18001054m|PAC4GC:7368823|Xelaev18001054m	VN#GSMVDLEWSEPLDAGGR	VN(1)GSMVDLEWSEPLDAGGR	13438000	0.00375084
gnl|Xelaev18001092m|PAC4GC:7368852|atp1b2.S	N#YTQPLVAVQFHN#VSR	N(1)YTQPLVAVQFHN(1)VSR	40843000	0.0114002
gnl|Xelaev18001092m|PAC4GC:7368852|atp1b2.S	IINFLPEVIPSLSN#SSITINCMGK	IINFLPEVIPSLSN(0.999)SSITINCMGK	18364000	0.0051258
gnl|Xelaev18001092m|PAC4GC:7368852|atp1b2.S	LNSALEMYN#DSVQVQQGSVCNPGVFNR	LNSALEMYN(0.939)DSVQVQQGSVCNPGVFNR	15686000	0.00437831
gnl|Xelaev18001163m|PAC4GC:7321896|plvap.S	IQLDNILQSCKPLPTEVANYIN#ASLANIK	IQLDNILQSCKPLPTEVANYIN(0.945)ASLANIK	14138000	0.00394623
gnl|Xelaev18001580m|PAC4GC:7358164|mfap4.L	IDLGDFEN#NTAHAK	IDLGDFEN(0.953)NTAHAK	23326000	0.0065108
gnl|Xelaev18001839m|PAC4GC:7369391|nup210.L	GANN#NTFIVR	GANN(0.901)NTFIVR	100800000	0.0281355
gnl|Xelaev18001839m|PAC4GC:7369391|nup210.L	GVMIGN#GTVTGVVQAVDAESGK	GVMIGN(1)GTVTGVVQAVDAESGK	40317000	0.0112534
gnl|Xelaev18001839m|PAC4GC:7369391|nup210.L	LPN#GTIYVVEPGYLGFTVHPGDR	LPN(1)GTIYVVEPGYLGFTVHPGDR	7583100	0.00211661
gnl|Xelaev18001839m|PAC4GC:7369391|nup210.L	DYFEVLETSLN#GSYHK	DYFEVLETSLN(1)GSYHK	4115500	0.00114873
gnl|Xelaev18001851m|PAC4GC:7369379|gp9.L	LFLQN#NSLTR	LFLQN(0.915)NSLTR	6456800	0.00180224
gnl|Xelaev18002038m|PAC4GC:7369040|Xelaev18002038m	LGCWGVNN#ASDIYFR	LGCWGVNN(0.907)ASDIYFR	39995000	0.0111635
gnl|Xelaev18002132m|PAC4GC:7357889|tmem30a.L	DATYPALAPGN#YSLHIEYNYPVLSFDGR	DATYPALAPGN(1)YSLHIEYNYPVLSFDGR	87749000	0.0244927
gnl|Xelaev18002139m|PAC4GC:7357893|im1.L	VTNMPFSDDLFN#K.S	VTNMPFSDDLFN(1)K.S	97521000	0.0272203
gnl|Xelaev18002224m|PAC4GC:7339627|Xelaev18002224m	QN#STLTLTPSDTLNNPEIVCQVQHESLPTPR	QN(0.974)STLTLTPSDTLNNPEIVCQVQHESLPTPR	4937900	0.00137828
gnl|Xelaev18002358m|PAC4GC:7339667|sez6l2.S	FLLAN#ETLMAEGQVIR	FLLAN(1)ETLMAEGQVIR	32622000	0.00910552
gnl|Xelaev18002521m|PAC4GC:7324436|lrp6.L	AFMN#GSALEHVVQFGLDYPEGMAVDWLGK	AFMN(1)GSALEHVVQFGLDYPEGMAVDWLGK	9820000	0.00274098
gnl|Xelaev18002572m|PAC4GC:7368500|Xelaev18002572m	ISFVN#ATSPVIEFWER	ISFVN(1)ATSPVIEFWER	18776000	0.0052408
gnl|Xelaev18002816m|PAC4GC:7321669|cercam.L	IIDAIDGGAMN#SSDIKR	IIDAIDGGAMN(1)SSDIKR	576050000	0.160788
gnl|Xelaev18002816m|PAC4GC:7321669|cercam.L	LLMAEN#K.T	LLMAEN(1)K.T	13001000	0.00362887
gnl|Xelaev18003033m|PAC4GC:7357945|wnt5a.S	FNSPTMNDLVYIDPSPDYCVHN#ESTGSLGTQGR	FNSPTMNDLVYIDPSPDYCVHN(0.998)ESTGSLGTQGR	6274300	0.0017513
gnl|Xelaev18003253m|PAC4GC:7369184|b3gnt7.L	LVHSN#LTCTR	LVHSN(1)LTCTR	221890000	0.0619344
gnl|Xelaev18003267m|PAC4GC:7369187|alpi.2.L	AYMYPAGTPDPEYIN#STSSR	AYMYPAGTPDPEYIN(1)STSSR	53135000	0.0148312
gnl|Xelaev18003267m|PAC4GC:7369187|alpi.2.L	AN#ITGVDTGSDSYLQQAAVPVVSETHGGEDVAIMAK	AN(1)ITGVDTGSDSYLQQAAVPVVSETHGGEDVAIMAK	14229000	0.00397163
gnl|Xelaev18003267m|PAC4GC:7369187|alpi.2.L	DGLN#LTDLWLSK	DGLN(1)LTDLWLSK	5407500	0.00150935
gnl|Xelaev18003280m|PAC4GC:7369189|Xelaev18003280m	DLTAYN#ITTSSVTLK	DLTAYN(1)ITTSSVTLK	205710000	0.0574182
gnl|Xelaev18003336m|PAC4GC:7361385|gpr107.L	HDMPLVSISEKTEEPPKN#DSTAEQPAPLPAK	HDMPLVSISEKTEEPPKN(1)DSTAEQPAPLPAK	55199000	0.0154073
gnl|Xelaev18003341m|PAC4GC:7361382|Xelaev18003341m	ININ#GSHDQSTPVR	ININ(1)GSHDQSTPVR	235040000	0.0656049
gnl|Xelaev18003341m|PAC4GC:7361382|Xelaev18003341m	VHTPPTIWASN#ETTEVASLLHGVVELR	VHTPPTIWASN(1)ETTEVASLLHGVVELR	13918000	0.00388482
gnl|Xelaev18003384m|PAC4GC:7358445|LOC100496186.1.L	N#ITVIGANPTGTVSASQR	N(1)ITVIGANPTGTVSASQR	11203000	0.003127
gnl|Xelaev18003390m|PAC4GC:7358440|Xelaev18003390m	LAQGDATLTLPN#VTDSDTGR	LAQGDATLTLPN(1)VTDSDTGR	9138100	0.00255065
gnl|Xelaev18003548m|PAC4GC:7361430|ecm2.2.L	IDDSGLSFDVFKN#LTK	IDDSGLSFDVFKN(1)LTK	8099700	0.00226081
gnl|Xelaev18003549m|PAC4GC:7361428|bgn.L	MIEN#GSLSFMPVLR	MIEN(1)GSLSFMPVLR	159980000	0.044654
gnl|Xelaev18003579m|PAC4GC:7345362|cdh15.L	VN#VTDKDLPGSVNWR	VN(1)VTDKDLPGSVNWR	20176000	0.00563157
gnl|Xelaev18003585m|PAC4GC:7345384|galns.L	ILNLLN#LTGIAK	ILNLLN(1)LTGIAK	180090000	0.0502671
gnl|Xelaev18003710m|PAC4GC:7357670|ms.L	LQSWYDWYN#VTQAGLLPHTYR	LQSWYDWYN(1)VTQAGLLPHTYR	30816000	0.00860143
gnl|Xelaev18003931m|PAC4GC:7321724|cpe.L	DHHGFPIAN#ATISVDGIDHDVTSAK	DHHGFPIAN(1)ATISVDGIDHDVTSAK	80011000	0.0223328
gnl|Xelaev18003964m|PAC4GC:7364018|cadm4.S	QTLFFN#GTR	QTLFFN(1)GTR	251440000	0.0701825
gnl|Xelaev18004029m|PAC4GC:7339833|kiaa1161.S	FN#YSHIEIDDMYSK	FN(1)YSHIEIDDMYSK	82906000	0.0231409
gnl|Xelaev18004131m|PAC4GC:7357622|eng.L	N#ITVISDSTIR	N(1)ITVISDSTIR	12206000	0.00340696
gnl|Xelaev18004131m|PAC4GC:7357622|eng.L	ESEIQGCEFKN#SSSAVK	ESEIQGCEFKN(1)SSSAVK	12041000	0.00336091
gnl|Xelaev18004178m|PAC4GC:7365958|lrrc4b.L	EIPN#LTALVR	EIPN(1)LTALVR	1723300	0.000481011
gnl|Xelaev18004187m|PAC4GC:7365964|ephb2.L	AGYESVEN#GTVCR	AGYESVEN(1)GTVCR	51332000	0.0143279
gnl|Xelaev18004262m|PAC4GC:7339797|dnase1l3.L	LRN#HTEFVWLIGDNKDTTVK	LRN(1)HTEFVWLIGDNKDTTVK	202110000	0.0564134
gnl|Xelaev18004384m|PAC4GC:7363989|colgalt1.S	MLN#QSN#VTEMGIK	MLN(1)QSN(1)VTEMGIK	111730000	0.0311863
gnl|Xelaev18004384m|PAC4GC:7363989|colgalt1.S	ISLWVATDHNFDN#TSQILR	ISLWVATDHNFDN(1)TSQILR	50891000	0.0142048
gnl|Xelaev18004404m|PAC4GC:7324387|hyou1.S	LSEDLTYSPEELLGMVLN#YSR	LSEDLTYSPEELLGMVLN(1)YSR	280510000	0.0782965
gnl|Xelaev18004404m|PAC4GC:7324387|hyou1.S	LISDTWTWKN#ETLAEQAK	LISDTWTWKN(1)ETLAEQAK	181390000	0.05063
gnl|Xelaev18004404m|PAC4GC:7324387|hyou1.S	DIN#ATAQNVMFYDMGTR	DIN(1)ATAQNVMFYDMGTR	103630000	0.0289254
gnl|Xelaev18004451m|PAC4GC:7368981|acp5.L	WNYPDYYYDLAFTIPGSN#VTVR	WNYPDYYYDLAFTIPGSN(1)VTVR	78709000	0.0219694
gnl|Xelaev18004451m|PAC4GC:7368981|acp5.L	GN#VSAQIAYTN#VSTR	GN(1)VSAQIAYTN(1)VSTR	11249000	0.00313984
gnl|Xelaev18004837m|PAC4GC:7332633|atrn.L	FIN#STQAK	FIN(1)STQAK	96176000	0.0268448
gnl|Xelaev18004837m|PAC4GC:7332633|atrn.L	WLSLN#NSVNSVVVR	WLSLN(0.995)NSVNSVVVR	64945000	0.0181276
gnl|Xelaev18005013m|PAC4GC:7329372|fgfrl1.L	VGQIN#ATYK	VGQIN(1)ATYK	18832000	0.00525643
gnl|Xelaev18005068m|PAC4GC:7329779|hgfac.L	IHVVLGQQFFN#QTTDVTQTFEVER	IHVVLGQQFFN(1)QTTDVTQTFEVER	29429000	0.00821428
gnl|Xelaev18005070m|PAC4GC:7330830|lrpap1.L	DAN#FSDSELESFKEELK	DAN(1)FSDSELESFKEELK	308660000	0.0861538
gnl|Xelaev18005084m|PAC4GC:7332879|sorcs2.L	EVN#LTAVIQPR	EVN(1)LTAVIQPR	4100900	0.00114465
gnl|Xelaev18005096m|PAC4GC:7331543|man2b2.L	QYFYSN#ITAK	QYFYSN(1)ITAK	92215000	0.0257392
gnl|Xelaev18005098m|PAC4GC:7331742|wfs1.L	YKFEITVGMPLN#GSK	YKFEITVGMPLN(1)GSK	75758000	0.0211457
gnl|Xelaev18005146m|PAC4GC:7332028|cd38.L	ASCGVVNVMLN#GSADGGVAR	ASCGVVNVMLN(1)GSADGGVAR	32631000	0.00910803
gnl|Xelaev18005149m|PAC4GC:7329290|prom1.L	ITSSLNQLNTNAN#FSVLPDLSHNLIR	ITSSLNQLNTNAN(0.915)FSVLPDLSHNLIR	38506000	0.0107479
gnl|Xelaev18005149m|PAC4GC:7329290|prom1.L	NVLESIGAN#ITSFSK	NVLESIGAN(1)ITSFSK	2956400	0.000825197
gnl|Xelaev18005170m|PAC4GC:7332089|adgra3.L	NIPAVPIN#LTLR	NIPAVPIN(1)LTLR	4089500	0.00114147
gnl|Xelaev18005176m|PAC4GC:7330133|sod3.L	LEAIFDLEGFPTDVN#QSAR	LEAIFDLEGFPTDVN(1)QSAR	12521000	0.00349489
gnl|Xelaev18005187m|PAC4GC:7330540|smim20.L	EQATN#RTDVIQEDVQPPGLK	EQATN(1)RTDVIQEDVQPPGLK	74630000	0.0208309
gnl|Xelaev18005330m|PAC4GC:7330318|asah1.L	GN#VSWYTVNLDQAPQER	GN(1)VSWYTVNLDQAPQER	184580000	0.0515204
gnl|Xelaev18005330m|PAC4GC:7330318|asah1.L	N#GTWYVLETNYDHWK	N(1)GTWYVLETNYDHWK	6491200	0.00181184
gnl|Xelaev18005339m|PAC4GC:7330350|klkb1.L	IIIHPHYTGAGN#GSDIALLK	IIIHPHYTGAGN(1)GSDIALLK	174420000	0.0486845
gnl|Xelaev18005345m|PAC4GC:7331753|tlr3.L	LDKEAFEFLAN#TSLQK	LDKEAFEFLAN(1)TSLQK	22341000	0.00623587
gnl|Xelaev18005393m|PAC4GC:7329303|aga.L	N#ATEAAWR	N(1)ATEAAWR	12971000	0.00362049
gnl|Xelaev18005449m|PAC4GC:7332734|Xetrov90000859m.L	RVN#YTINIMELK	RVN(1)YTINIMELK	19997000	0.0055816
gnl|Xelaev18005449m|PAC4GC:7332734|Xetrov90000859m.L	IQFGGAN#VSGFQIVDYDDPLVAK	IQFGGAN(1)VSGFQIVDYDDPLVAK	2021400	0.000564217
gnl|Xelaev18005466m|PAC4GC:7332037|fga.L	EDGSVNFN#R.T	EDGSVNFN(1)R.T	367380000	0.102544
gnl|Xelaev18005467m|PAC4GC:7332093|fgb.L	GTAGNALMDGASQLKGEN#R.T	GTAGNALMDGASQLKGEN(1)R.T	143840000	0.0401489
gnl|Xelaev18005647m|PAC4GC:7331429|enpep.L	LIYN#TSLIK	LIYN(1)TSLIK	86495000	0.0241427
gnl|Xelaev18005652m|PAC4GC:7331992|cfi.L	WGHINLMDN#CTR	WGHINLMDN(1)CTR	98398000	0.0274651
gnl|Xelaev18005778m|PAC4GC:7330681|mmrn1.L	VLN#STVIASSHK	VLN(1)STVIASSHK	5359400	0.00149593
gnl|Xelaev18005783m|PAC4GC:7331242|LOC100489122.L	HN#LTFVEPTER	HN(1)LTFVEPTER	313550000	0.0875187
gnl|Xelaev18005847m|PAC4GC:7330103|MGC69088.L	MTIHTTLMSAAFPEN#YTTVVR	MTIHTTLMSAAFPEN(1)YTTVVR	7736600	0.00215946
gnl|Xelaev18005848m|PAC4GC:7332448|naaa.L	ALN#ATGQANISADTLYK	ALN(1)ATGQANISADTLYK	91550000	0.0255536
gnl|Xelaev18005848m|PAC4GC:7332448|naaa.L	HYN#FSLLR	HYN(1)FSLLR	40666000	0.0113508
gnl|Xelaev18005848m|PAC4GC:7332448|naaa.L	YN#ISLDDPPEER	YN(1)ISLDDPPEER	30672000	0.00856123
gnl|Xelaev18005851m|PAC4GC:7332399|scarb2.L	MN#TTDDGEYVFLSGNNDYLK	MN(1)TTDDGEYVFLSGNNDYLK	144680000	0.0403834
gnl|Xelaev18005851m|PAC4GC:7332399|scarb2.L	QKEN#ITFSVN#ETEVSAVTPK	QKEN(1)ITFSVN(1)ETEVSAVTPK	14524000	0.00405397
gnl|Xelaev18005869m|PAC4GC:7333095|fras1.L	AN#ESAGLMSVPIER	AN(1)ESAGLMSVPIER	8735900	0.00243838
gnl|Xelaev18006252m|PAC4GC:7332678|tmem259.L	VEIQLN#SSR	VEIQLN(1)SSR	215950000	0.0602764
gnl|Xelaev18006252m|PAC4GC:7332678|tmem259.L	VFLKPSLESVTPASEN#QSQTLSFSDAASK	VFLKPSLESVTPASEN(1)QSQTLSFSDAASK	72506000	0.020238
gnl|Xelaev18006263m|PAC4GC:7332008|cfd.L	EIPHPLYN#STKK	EIPHPLYN(1)STKK	2311200000	0.645107
gnl|Xelaev18006286m|PAC4GC:7331340|LOC100494186.L	AN#ITTVASIR	AN(1)ITTVASIR	32715000	0.00913148
gnl|Xelaev18006360m|PAC4GC:7332331|Xelaev18006360m	LHQDGLSSLN#YTIISITSHK	LHQDGLSSLN(1)YTIISITSHK	15054000	0.0042019
gnl|Xelaev18006361m|PAC4GC:7329591|Xelaev18006361m	FVYN#TSILK	FVYN(1)TSILK	140790000	0.0392976
gnl|Xelaev18006379m|PAC4GC:7332507|ifi30.L	YFPILFCMESSHN#VTK	YFPILFCMESSHN(1)VTK	40015000	0.0111691
gnl|Xelaev18006455m|PAC4GC:7331346|bsg.L	QVIN#VSVSPQVLHLK	QVIN(1)VSVSPQVLHLK	592470000	0.165371
gnl|Xelaev18006455m|PAC4GC:7331346|bsg.L	VLKEDKDSSNTMTYN#VTGLPGDGSGQYTCEFLTTPDVK	VLKEDKDSSNTMTYN(0.992)VTGLPGDGSGQYTCEFLTTPDVK	566120000	0.158017
gnl|Xelaev18006455m|PAC4GC:7331346|bsg.L	DYTCN#ATNELGSGGDIIHFHVR	DYTCN(1)ATNELGSGGDIIHFHVR	248330000	0.0693144
gnl|Xelaev18006464m|PAC4GC:7329774|prss57.L	LN#DSAVITSAVR	LN(1)DSAVITSAVR	379190000	0.10584
gnl|Xelaev18006583m|PAC4GC:7330286|insr.L	VLTPGN#YSVK	VLTPGN(1)YSVK	97067000	0.0270935
gnl|Xelaev18006620m|PAC4GC:7332464|ncan.L	YN#ATLVLSSAR	YN(1)ATLVLSSAR	137970000	0.0385105
gnl|Xelaev18006620m|PAC4GC:7332464|ncan.L	ELN#VSDASISDSAFR	ELN(1)VSDASISDSAFR	43550000	0.0121558
gnl|Xelaev18006638m|PAC4GC:7329666|ncln.L	VIYN#LTEK	VIYN(1)LTEK	2600400000	0.725829
gnl|Xelaev18006700m|PAC4GC:7332718|svep1.L	DADATGDN#YTYSNIITYK	DADATGDN(0.988)YTYSNIITYK	3460600	0.00096593
gnl|Xelaev18006720m|PAC4GC:7330626|adamtsl1.L	LHSVSHHSDASLAIGN#VTK	LHSVSHHSDASLAIGN(1)VTK	7298100	0.00203706
gnl|Xelaev18006785m|PAC4GC:7329752|lingo2.L	LVPIGVFTGLSN#LTK	LVPIGVFTGLSN(1)LTK	4922500	0.00137398
gnl|Xelaev18006806m|PAC4GC:7332602|tyrp1.L	NTIEGYSEPNGQYN#ATVR	NTIEGYSEPNGQYN(1)ATVR	2640300000	0.736966
gnl|Xelaev18006806m|PAC4GC:7332602|tyrp1.L	VVCEFVEDYESLGTICN#STR	VVCEFVEDYESLGTICN(1)STR	204690000	0.0571335
gnl|Xelaev18006821m|PAC4GC:7330968|ermp1.L	QLVTPGGHSTGFN#ASTAR	QLVTPGGHSTGFN(1)ASTAR	486380000	0.135759
gnl|Xelaev18006821m|PAC4GC:7330968|ermp1.L	DSGIWINGFDYTGISYVTPHIPELN#ETVR	DSGIWINGFDYTGISYVTPHIPELN(1)ETVR	16079000	0.004488
gnl|Xelaev18006885m|PAC4GC:7331410|tmem2.L	FDTYVHQN#ESKR	FDTYVHQN(1)ESKR	9734500	0.00271711
gnl|Xelaev18006885m|PAC4GC:7331410|tmem2.L	EEIQQGTTEAFISVN#GTK	EEIQQGTTEAFISVN(1)GTK	5898800	0.00164649
gnl|Xelaev18006910m|PAC4GC:7330494|gcnt1.L	KDNPVISVN#CTK	KDNPVISVN(1)CTK	4334900	0.00120997
gnl|Xelaev18006934m|PAC4GC:7331671|ntrk2.L	GIAAFPVLEDSSLAEN#ITDIYIANQR	GIAAFPVLEDSSLAEN(1)ITDIYIANQR	15459000	0.00431495
gnl|Xelaev18006934m|PAC4GC:7331671|ntrk2.L	N#LTVVDSGLQIVSR	N(1)LTVVDSGLQIVSR	1782300	0.000497479
gnl|Xelaev18006949m|PAC4GC:7332432|ctsv.L	DDQECHYDPNYNSAN#DTGFVDVPSGSEK	DDQECHYDPNYNSAN(0.999)DTGFVDVPSGSEK	1003200000	0.280015
gnl|Xelaev18007342m|PAC4GC:7332161|loc100496462.L	LPNCGYN#QTR	LPNCGYN(1)QTR	33530000	0.00935896
gnl|Xelaev18007589m|PAC4GC:7331913|slc5a1.2.L	YMNAIPSVTSYDN#ITIPEK	YMNAIPSVTSYDN(1)ITIPEK	13308000	0.00371456
gnl|Xelaev18007600m|PAC4GC:7331863|ggt1.L	LHNQLFPGN#STLEK	LHNQLFPGN(1)STLEK	764560000	0.213406
gnl|Xelaev18007600m|PAC4GC:7331863|ggt1.L	EGFPVGLGLEQGLN#R.S	EGFPVGLGLEQGLN(1)R.S	109000000	0.0304243
gnl|Xelaev18007600m|PAC4GC:7331863|ggt1.L	GYN#FSSQSVATVEK	GYN(1)FSSQSVATVEK	91268000	0.0254749
gnl|Xelaev18007600m|PAC4GC:7331863|ggt1.L	MFGN#NSQLSQNGGLSIAVPGEIR	MFGN(0.907)NSQLSQNGGLSIAVPGEIR	23434000	0.00654095
gnl|Xelaev18007670m|PAC4GC:7332055|dgcr2.L	VN#GSLATFTTDQELK	VN(1)GSLATFTTDQELK	24415000	0.00681477
gnl|Xelaev18007679m|PAC4GC:7329692|serpind1.L	WQNIMTN#R.T	WQNIMTN(1)R.T	972600000	0.271474
gnl|Xelaev18007679m|PAC4GC:7329692|serpind1.L	DFLN#ASSK	DFLN(1)ASSK	57303000	0.0159945
gnl|Xelaev18007773m|PAC4GC:7332365|tctn2.L	FTATFLN#GSR	FTATFLN(1)GSR	29234000	0.00815986
gnl|Xelaev18007833m|PAC4GC:7329260|p2rx4.L	VKGVVVTN#TTELGVK	VKGVVVTN(1)TTELGVK	308700000	0.086165
gnl|Xelaev18007833m|PAC4GC:7329260|p2rx4.L	NILSN#ISSSYLK	NILSN(1)ISSSYLK	115150000	0.0321409
gnl|Xelaev18007833m|PAC4GC:7329260|p2rx4.L	CVPYN#STVK	CVPYN(1)STVK	25354000	0.00707686
gnl|Xelaev18007895m|PAC4GC:7330060|vsig10.L	DTLVTYLN#SSSLR	DTLVTYLN(1)SSSLR	22465000	0.00627048
gnl|Xelaev18007909m|PAC4GC:7331302|susd2.L	EGFLSVNVLLPDDFIN#QTQGLLGR	EGFLSVNVLLPDDFIN(0.993)QTQGLLGR	2651300	0.000740036
gnl|Xelaev18007929m|PAC4GC:7330257|LOC101733398.L	N#ITLIEDTEIAR	N(1)ITLIEDTEIAR	2694700	0.00075215
gnl|Xelaev18007980m|PAC4GC:7332342|sema6a.L	IAVDTAAGPYQN#HTVVFLGSEK	IAVDTAAGPYQN(1)HTVVFLGSEK	15867000	0.00442883
gnl|Xelaev18008052m|PAC4GC:7332841|lnpep.L	DSLN#SSHPISTDVR	DSLN(1)SSHPISTDVR	688410000	0.19215
gnl|Xelaev18008052m|PAC4GC:7332841|lnpep.L	ETTLLYKEN#SSSIEDK	ETTLLYKEN(1)SSSIEDK	308270000	0.086045
gnl|Xelaev18008052m|PAC4GC:7332841|lnpep.L	LMEHGLELLN#NTLIK	LMEHGLELLN(0.984)NTLIK	212300000	0.0592576
gnl|Xelaev18008052m|PAC4GC:7332841|lnpep.L	EATGTIN#VSSELPWVK	EATGTIN(1)VSSELPWVK	206190000	0.0575522
gnl|Xelaev18008052m|PAC4GC:7332841|lnpep.L	FNVN#MTGYYIVDYGADGWDALIEQLHR	FNVN(0.975)MTGYYIVDYGADGWDALIEQLHR	31997000	0.00893107
gnl|Xelaev18008079m|PAC4GC:7333005|adgrv1.L	NQPAIGQPN#SSVVVIR	NQPAIGQPN(1)SSVVVIR	5821400	0.00162488
gnl|Xelaev18008079m|PAC4GC:7333005|adgrv1.L	LYGFQGN#ITVLR	LYGFQGN(1)ITVLR	4749100	0.00132558
gnl|Xelaev18008104m|PAC4GC:7330390|vcan.L	YSN#QTYFPHSQER	YSN(1)QTYFPHSQER	3583300000	1.00018
gnl|Xelaev18008104m|PAC4GC:7330390|vcan.L	IDLHVEN#HTK	IDLHVEN(1)HTK	830110000	0.231702
gnl|Xelaev18008104m|PAC4GC:7330390|vcan.L	RN#ITEAVSVR	RN(1)ITEAVSVR	378390000	0.105617
gnl|Xelaev18008160m|PAC4GC:7330017|hexb.L	YYKVEPLSFN#GTAQQK	YYKVEPLSFN(1)GTAQQK	1296200000	0.361798
gnl|Xelaev18008160m|PAC4GC:7330017|hexb.L	GLETFSQLIYEDSFGAFLIN#K.T	GLETFSQLIYEDSFGAFLIN(1)K	68625000	0.0191548
gnl|Xelaev18008173m|PAC4GC:7329469|sv2c.L	FN#YTLENQIHK	FN(1)YTLENQIHK	18150000	0.00506607
gnl|Xelaev18008173m|PAC4GC:7329469|sv2c.L	FTDSEMIN#CTFLLPK	FTDSEMIN(1)CTFLLPK	11051000	0.00308458
gnl|Xelaev18008175m|PAC4GC:7330343|f2rl2.L	VSN#LTLGYLSGK	VSN(1)LTLGYLSGK	3071400	0.000857296
gnl|Xelaev18008178m|PAC4GC:7331202|f2rl1.L	VFIAHGVETGN#GTGK	VFIAHGVETGN(1)GTGK	28981000	0.00808924
gnl|Xelaev18008192m|PAC4GC:7329986|arsb.L	LYAGMVSVLDEAVAN#VTNALKK	LYAGMVSVLDEAVAN(1)VTNALKK	106720000	0.0297879
gnl|Xelaev18008271m|PAC4GC:7331069|il6st.L	NVN#GTFLR	NVN(1)GTFLR	74926000	0.0209135
gnl|Xelaev18008278m|PAC4GC:7331983|Xelaev18008278m	IN#CSLGYIENFVCEGDPTK	IN(1)CSLGYIENFVCEGDPTK	24619000	0.00687171
gnl|Xelaev18008294m|PAC4GC:7332377|cspg4.L	HDDSNNLQDAFN#LTAK	HDDSNNLQDAFN(1)LTAK	9446800	0.00263681
gnl|Xelaev18008294m|PAC4GC:7332377|cspg4.L	DLDASELGN#MTGSDPEFHVIDEPR	DLDASELGN(1)MTGSDPEFHVIDEPR	5509400	0.0015378
gnl|Xelaev18008301m|PAC4GC:7330297|fst.L	LGTSWTEEDVPN#STLFK	LGTSWTEEDVPN(1)STLFK	21022000	0.0058677
gnl|Xelaev18008304m|PAC4GC:7330600|itga2.L	EAREEDNSVN#ITLPVQYDAEIHLTR	EAREEDNSVN(0.943)ITLPVQYDAEIHLTR	33704000	0.00940753
gnl|Xelaev18008304m|PAC4GC:7330600|itga2.L	MNLAVATIIPN#VTEK	MNLAVATIIPN(1)VTEK	32288000	0.00901229
gnl|Xelaev18008304m|PAC4GC:7330600|itga2.L	FFFN#VSDEVALLEK	FFFN(1)VSDEVALLEK	25809000	0.00720386
gnl|Xelaev18008305m|PAC4GC:7331525|itga1.L	YN#HTGQVIIFK	YN(1)HTGQVIIFK	84194000	0.0235004
gnl|Xelaev18008305m|PAC4GC:7331525|itga1.L	HFFN#VSNELALLNIVESLGER	HFFN(0.993)VSNELALLNIVESLGER	12236000	0.00341534
gnl|Xelaev18008312m|PAC4GC:7331489|emb.L	ILISN#ATSVR	ILISN(1)ATSVR	89746000	0.0250501
gnl|Xelaev18008312m|PAC4GC:7331489|emb.L	LLN#ATNTSENK	LLN(0.999)ATNTSENK	12882000	0.00359565
gnl|Xelaev18008334m|PAC4GC:7330973|c6.2.L	MDIVSGN#GTGQNR	MDIVSGN(0.998)GTGQNR	30793000	0.00859501
gnl|Xelaev18008344m|PAC4GC:7332329|c9.L	N#VSVNANAGIGYSK	N(1)VSVNANAGIGYSK	901080000	0.251511
gnl|Xelaev18008344m|PAC4GC:7332329|c9.L	LTPTENKN#VSVNANAGIGYSK	LTPTENKN(0.997)VSVNANAGIGYSK	516600000	0.144194
gnl|Xelaev18008363m|PAC4GC:7330059|slc1a3.L	VPIPAN#ESLLSSVANNVSEAMETLVK	VPIPAN(1)ESLLSSVANNVSEAMETLVK	435770000	0.121633
gnl|Xelaev18008363m|PAC4GC:7330059|slc1a3.L	LFRVPIPAN#ESLLSSVANNVSEAMETLVK	LFRVPIPAN(0.998)ESLLSSVANNVSEAMETLVK	96655000	0.0269785
gnl|Xelaev18008382m|PAC4GC:7331881|adamts12.L	ELPISSGGFCAVN#DTSR	ELPISSGGFCAVN(1)DTSR	5189900	0.00144862
gnl|Xelaev18008434m|PAC4GC:7329476|dcc.L	GGNVVLN#CSAQSDR	GGNVVLN(1)CSAQSDR	11356000	0.00316971
gnl|Xelaev18008532m|PAC4GC:7331513|cntfr.L	N#STSISFDEFSIVKPDPPENVVAKPVHNNPR	N(1)STSISFDEFSIVKPDPPENVVAKPVHNNPR	29640000	0.00827318
gnl|Xelaev18008641m|PAC4GC:7332290|LOC100485348.L	DN#CTSLCINPK	DN(1)CTSLCINPK	6617000	0.00184695
gnl|Xelaev18008650m|PAC4GC:7334888|loxl3.S	CLGTEGSLLECQYKN#ITEEDCK	CLGTEGSLLECQYKN(1)ITEEDCK	2957800	0.000825587
gnl|Xelaev18008761m|PAC4GC:7336389|cpxm1.S	VQVSN#DTHTWK	VQVSN(1)DTHTWK	255700000	0.0713715
gnl|Xelaev18008761m|PAC4GC:7336389|cpxm1.S	INPQTWFEN#GTICLR	INPQTWFEN(1)GTICLR	42725000	0.0119255
gnl|Xelaev18008761m|PAC4GC:7336389|cpxm1.S	AN#GTVQPTPYGDENLEEPLPK	AN(1)GTVQPTPYGDENLEEPLPK	3554900	0.000992251
gnl|Xelaev18008792m|PAC4GC:7337120|atrn.S	DLDMFIN#ASK	DLDMFIN(1)ASK	58906000	0.016442
gnl|Xelaev18008900m|PAC4GC:7337231|cpz.S	IQTLIN#TTR	IQTLIN(1)TTR	793120000	0.221377
gnl|Xelaev18008960m|PAC4GC:7335499|slit2.S	DLEVLTLNNNN#ITR	DLEVLTLNNNN(0.943)ITR	26522000	0.00740288
gnl|Xelaev18008960m|PAC4GC:7335499|slit2.S	QSSSQN#GTNFQGCIR	QSSSQN(0.998)GTNFQGCIR	4767700	0.00133077
gnl|Xelaev18008962m|PAC4GC:7334978|adgra3.S	NIPVVPIN#ITLR	NIPVVPIN(1)ITLR	26701000	0.00745284
gnl|Xelaev18008962m|PAC4GC:7334978|adgra3.S	ISELTN#GSFEGLSFLER	ISELTN(1)GSFEGLSFLER	24109000	0.00672935
gnl|Xelaev18008968m|PAC4GC:7335660|sod3.S	LEAIFDLEGFPTDAN#QSTR	LEAIFDLEGFPTDAN(1)QSTR	44076000	0.0123026
gnl|Xelaev18008970m|PAC4GC:7336986|lgi2.S	AIPGDISSLSLVN#GTFSEIK	AIPGDISSLSLVN(1)GTFSEIK	3555900	0.00099253
gnl|Xelaev18009028m|PAC4GC:7335183|gabrb1.S	LSYSGIPLN#LTLDNR	LSYSGIPLN(0.982)LTLDNR	9995100	0.00278985
gnl|Xelaev18009051m|PAC4GC:7336849|sgcb.S	ITSN#ATSDLNIK	ITSN(1)ATSDLNIK	791160000	0.22083
gnl|Xelaev18009061m|PAC4GC:7335060|pdgfra.S	ATHN#ISVEMEAPK	ATHN(1)ISVEMEAPK	62509000	0.0174476
gnl|Xelaev18009061m|PAC4GC:7335060|pdgfra.S	LVYTLNIAN#ATAK	LVYTLNIAN(0.999)ATAK	17762000	0.00495777
gnl|Xelaev18009066m|PAC4GC:7337153|Xelaev18009066m	FIQEN#SSLGR	FIQEN(1)SSLGR	32331000	0.0090243
gnl|Xelaev18009106m|PAC4GC:7336144|fat1.S	IN#ASIAEIEEISGVK	IN(1)ASIAEIEEISGVK	7195600	0.00200845
gnl|Xelaev18009106m|PAC4GC:7336144|fat1.S	QITQEILN#HSITFR	QITQEILN(1)HSITFR	5063200	0.00141325
gnl|Xelaev18009106m|PAC4GC:7336144|fat1.S	ITATDGENLARPIYIN#ITLTSSR	ITATDGENLARPIYIN(0.989)ITLTSSR	2968600	0.000828602
gnl|Xelaev18009106m|PAC4GC:7336144|fat1.S	FLIDPLEGTITVQN#TTNLR	FLIDPLEGTITVQN(0.941)TTNLR	2390900	0.000667353
gnl|Xelaev18009144m|PAC4GC:7337160|Xetrov90000766m.S	LTN#VTFPTGVVTNLHGEMDK	LTN(1)VTFPTGVVTNLHGEMDK	94558000	0.0263932
gnl|Xelaev18009144m|PAC4GC:7337160|Xetrov90000766m.S	IFPSGN#VTSVLELSSNLAHR	IFPSGN(1)VTSVLELSSNLAHR	6726700	0.00187757
gnl|Xelaev18009177m|PAC4GC:7336242|tll1-like.1.S	IVLN#FTTMDLYK	IVLN(1)FTTMDLYK	40950000	0.0114301
gnl|Xelaev18009178m|PAC4GC:7336671|cpe.S	EN#ETIVNLIHNTR	EN(0.999)ETIVNLIHNTR	220090000	0.061432
gnl|Xelaev18009178m|PAC4GC:7336671|cpe.S	DHHGLPIAN#ATISIDGIDHDVTSAK	DHHGLPIAN(1)ATISIDGIDHDVTSAK	122870000	0.0342957
gnl|Xelaev18009208m|PAC4GC:7335051|fgg.S	YQETVDTDLQYLENLIAQISN#STSGTTIIVEHLISSGK	YQETVDTDLQYLENLIAQISN(1)STSGTTIIVEHLISSGK	191890000	0.0535607
gnl|Xelaev18009211m|PAC4GC:7336470|fgb.S	GTAGNALMEGASQLKGEN#R.T	GTAGNALMEGASQLKGEN(1)R.T	773870000	0.216004
gnl|Xelaev18009317m|PAC4GC:7335405|fat4.S	EIAPQLLLN#ISAQDQGPQPK	EIAPQLLLN(1)ISAQDQGPQPK	8404700	0.00234594
gnl|Xelaev18009317m|PAC4GC:7335405|fat4.S	IN#ITISDVNDHIPK	IN(1)ITISDVNDHIPK	2119400	0.000591571
gnl|Xelaev18009343m|PAC4GC:7336808|enpep.S	AEKLDYN#ISLDMTK	AEKLDYN(1)ISLDMTK	13957000	0.00389571
gnl|Xelaev18009343m|PAC4GC:7336808|enpep.S	IYVQPLQN#ATAVYAADTTK	IYVQPLQN(1)ATAVYAADTTK	3127200	0.000872871
gnl|Xelaev18009364m|PAC4GC:7335920|ugt8.S	YPGIFN#SSTSDNFLQSK	YPGIFN(1)SSTSDNFLQSK	195670000	0.0546158
gnl|Xelaev18009364m|PAC4GC:7335920|ugt8.S	MTEDSLFASLTEVIHN#QSYQQQAVK	MTEDSLFASLTEVIHN(1)QSYQQQAVK	4702000	0.00131243
gnl|Xelaev18009415m|PAC4GC:7337241|slc39a8.S	LSSSN#VSQLLHGCDAR	LSSSN(1)VSQLLHGCDAR	39354000	0.0109846
gnl|Xelaev18009425m|PAC4GC:7336561|mttp.1.S	EHFEPQN#LSK	EHFEPQN(1)LSK	17431000	0.00486538
gnl|Xelaev18009448m|PAC4GC:7334892|unc5c.S	LSDTAN#YTCVAK	LSDTAN(1)YTCVAK	67923000	0.0189588
gnl|Xelaev18009507m|PAC4GC:7335084|alb.S	LAHN#LTEEVTHFIK	LAHN(1)LTEEVTHFIK	10525000	0.00293776
gnl|Xelaev18009513m|PAC4GC:7335401|gc.S	KYSN#ATFEEIGHLVTAIVSLAETCCAK	KYSN(1)ATFEEIGHLVTAIVSLAETCCAK	3507600	0.000979049
gnl|Xelaev18009521m|PAC4GC:7335535|scarb2.S	MN#TTDDGEYVFLSGK	MN(1)TTDDGEYVFLSGK	43060000	0.012019
gnl|Xelaev18009618m|PAC4GC:7334999|fbn3.S	AWGNPCEFCPFAN#STEYK	AWGNPCEFCPFAN(1)STEYK	66693000	0.0186155
gnl|Xelaev18009618m|PAC4GC:7334999|fbn3.S	NYN#DTCENELSSNMTK	NYN(0.998)DTCENELSSNMTK	8651200	0.00241474
gnl|Xelaev18009785m|PAC4GC:7335237|tmem259.S	VFLKPSLESVTQASEN#QSQTLSFSDATSK	VFLKPSLESVTQASEN(1)QSQTLSFSDATSK	24741000	0.00690576
gnl|Xelaev18009793m|PAC4GC:7335957|prtn3.S	LQELN#VTVTSR	LQELN(1)VTVTSR	914930000	0.255377
gnl|Xelaev18009822m|PAC4GC:7336068|angptl4.S	LVQHN#VSLVELSR	LVQHN(1)VSLVELSR	151220000	0.0422088
gnl|Xelaev18009936m|PAC4GC:7337270|bsg.S	MVVN#VSVSPQVLHLK	MVVN(1)VSVSPQVLHLK	754090000	0.210483
gnl|Xelaev18009936m|PAC4GC:7337270|bsg.S	ISNVDIEKDQNEYTCN#ATNELGTGGDVIHFK	ISNVDIEKDQNEYTCN(0.982)ATNELGTGGDVIHFK	488230000	0.136276
gnl|Xelaev18009936m|PAC4GC:7337270|bsg.S	VLHEDKDTSNVMTYN#VTGLPGDGSGQYTCEFLTTPDVR	VLHEDKDTSNVMTYN(0.984)VTGLPGDGSGQYTCEFLTTPDVR	28473000	0.00794744
gnl|Xelaev18009940m|PAC4GC:7336261|prss57.S	LN#DSAVVNSAVR	LN(1)DSAVVNSAVR	63705000	0.0177815
gnl|Xelaev18009945m|PAC4GC:7335285|LOC101731250.S	LPEMFLVN#SSALK	LPEMFLVN(1)SSALK	4566400	0.00127458
gnl|Xelaev18010022m|PAC4GC:7335268|abca1.S	ILYTPSTPATQMLMSEVN#KTFQELSVFR	ILYTPSTPATQMLMSEVN(1)KTFQELSVFR	76041000	0.0212247
gnl|Xelaev18010022m|PAC4GC:7335268|abca1.S	RQN#TSDILQNLTGR	RQN(1)TSDILQNLTGR	61326000	0.0171174
gnl|Xelaev18010022m|PAC4GC:7335268|abca1.S	EGEDPASYGITAFNHPLN#LTK	EGEDPASYGITAFNHPLN(0.981)LTK	7978400	0.00222695
gnl|Xelaev18010065m|PAC4GC:7336380|ptprd.S	KVEVEAVN#STSVK	KVEVEAVN(1)STSVK	9916000	0.00276777
gnl|Xelaev18010127m|PAC4GC:7336819|pcsk5.S	GPGPLN#CTVCPASQVLYVDEGR	GPGPLN(1)CTVCPASQVLYVDEGR	6370900	0.00177826
gnl|Xelaev18010154m|PAC4GC:7335213|ntrk2.S	GIVAFPVLEDSSLAEN#ITDIYIANQR	GIVAFPVLEDSSLAEN(1)ITDIYIANQR	8297000	0.00231588
gnl|Xelaev18010203m|PAC4GC:7334878|ror2.S	YQQCYN#GTGTDYR	YQQCYN(1)GTGTDYR	50914000	0.0142112
gnl|Xelaev18010210m|PAC4GC:7335171|tm9sf1.S	IIYAN#VSVR	IIYAN(1)VSVR	200910000	0.0560784
gnl|Xelaev18010387m|PAC4GC:7337003|ficd.S	YVN#ATLVSR	YVN(1)ATLVSR	16392000	0.00457537
gnl|Xelaev18010455m|PAC4GC:7336285|hsd11b1l.2.S	LGAASAHYVASDMGN#LTSAQYVAQEAVNK	LGAASAHYVASDMGN(1)LTSAQYVAQEAVNK	23220000	0.00648122
gnl|Xelaev18010501m|PAC4GC:7334837|ggt5.S	GADAFYQGPIAEQMLEDLQSQGSN#LTLDDFTNYK	GADAFYQGPIAEQMLEDLQSQGSN(1)LTLDDFTNYK	38478000	0.0107401
gnl|Xelaev18010524m|PAC4GC:7335144|serpind1.S	DFLN#VSSK	DFLN(1)VSSK	65483000	0.0182778
gnl|Xelaev18010566m|PAC4GC:7336383|galnt9.S	VYN#NTITYGELR	VYN(0.988)NTITYGELR	5762000	0.0016083
gnl|Xelaev18010586m|PAC4GC:7335373|tmem132c.S	IGN#ISLYR	IGN(1)ISLYR	14940000	0.00417008
gnl|Xelaev18010707m|PAC4GC:7336044|kremen1.S	FN#FTLFDIK	FN(1)FTLFDIK	1088800	0.000303908
gnl|Xelaev18010757m|PAC4GC:7335344|sema6a.S	IAVDTAAGPYQN#QTVVFLGSEK	IAVDTAAGPYQN(1)QTVVFLGSEK	28967000	0.00808533
gnl|Xelaev18010783m|PAC4GC:7336254|man2a1.S	DSVIN#LSESVK	DSVIN(1)LSESVK	57346000	0.0160065
gnl|Xelaev18010807m|PAC4GC:7335118|erap1.S	WQESN#GTISLPR	WQESN(1)GTISLPR	8436100	0.0023547
gnl|Xelaev18010847m|PAC4GC:7336443|vcan.S	FSN#QTYFPNSQER	FSN(1)QTYFPNSQER	539870000	0.15069
gnl|Xelaev18010847m|PAC4GC:7336443|vcan.S	IDLHLEN#HTK	IDLHLEN(1)HTK	462410000	0.129069
gnl|Xelaev18010847m|PAC4GC:7336443|vcan.S	N#VTIDRDTEIATK	N(1)VTIDRDTEIATK	22956000	0.00640753
gnl|Xelaev18010883m|PAC4GC:7337008|hexb.S	YYKVEPLNFN#GTAQQK	YYKVEPLNFN(0.999)GTAQQK	625520000	0.174596
gnl|Xelaev18010883m|PAC4GC:7337008|hexb.S	GQLSGTYGPVNPIIN#DTYSFMYK	GQLSGTYGPVNPIIN(1)DTYSFMYK	540280000	0.150804
gnl|Xelaev18010883m|PAC4GC:7337008|hexb.S	GLETFSQLIYEDSYGAFMIN#K.T	GLETFSQLIYEDSYGAFMIN(1)K.T	2753100	0.000768451
gnl|Xelaev18010947m|PAC4GC:7337105|Xelaev18010947m	IN#CSLGYIETFVCEGDPTK	IN(1)CSLGYIETFVCEGDPTK	12508000	0.00349126
gnl|Xelaev18010971m|PAC4GC:7335931|itga1.S	HFFN#VSDELALSNIVGSLGER	HFFN(1)VSDELALSNIVGSLGER	6319500	0.00176391
gnl|Xelaev18011019m|PAC4GC:7336531|slc1a3.S	VPVPHN#ESLLSSIANNVSEAMESLVK	VPVPHN(1)ESLLSSIANNVSEAMESLVK	30166000	0.00842
gnl|Xelaev18011066m|PAC4GC:7337050|st8sia3.S	KTN#LTTFNPSILEK	KTN(0.986)LTTFNPSILEK	5306700	0.00148122
gnl|Xelaev18011122m|PAC4GC:7336021|st8sia5.S	YFEFYEGPLDFN#STK	YFEFYEGPLDFN(1)STK	4976400	0.00138902
gnl|Xelaev18011196m|PAC4GC:7354551|Xetrov90025900m.L	AN#ATFSPGSLTINR	AN(1)ATFSPGSLTINR	31149000	0.00869437
gnl|Xelaev18011231m|PAC4GC:7355849|vtcn1.L	VGGYTDVVVTSPSN#DTLR	VGGYTDVVVTSPSN(1)DTLR	32123000	0.00896624
gnl|Xelaev18011237m|PAC4GC:7355511|fstl1.L	KYDDGDSQLDSAELQSFLEQSQSTN#ISTYK	KYDDGDSQLDSAELQSFLEQSQSTN(1)ISTYK	3870900	0.00108045
gnl|Xelaev18011322m|PAC4GC:7354344|mpzl1.L	DN#GTYTCSVVTLPDLGSMTK	DN(1)GTYTCSVVTLPDLGSMTK	7210900	0.00201272
gnl|Xelaev18011324m|PAC4GC:7353332|creg1.L	LN#VTNIWVLDYFGGIK	LN(1)VTNIWVLDYFGGIK	11773000	0.0032861
gnl|Xelaev18011330m|PAC4GC:7355205|gpa33.L	N#ATLPCTYQTTADK	N(1)ATLPCTYQTTADK	316930000	0.0884622
gnl|Xelaev18011400m|PAC4GC:7354518|Xelaev18011400m	VFAGLLN#LSNYYDSNGHLVEK	VFAGLLN(0.997)LSNYYDSNGHLVEK	89575000	0.0250024
gnl|Xelaev18011412m|PAC4GC:7353105|Xelaev18011412m	NLN#YSATCPYGNTVSLR	NLN(0.965)YSATCPYGNTVSLR	2274700	0.000634919
gnl|Xelaev18011488m|PAC4GC:7353894|ifngr2.2.L	WIETPDFQASIN#TTLGPVK	WIETPDFQASIN(1)TTLGPVK	6711400	0.0018733
gnl|Xelaev18011533m|PAC4GC:7353491|app.L	MN#QSFSLLYK	MN(1)QSFSLLYK	51939000	0.0144973
gnl|Xelaev18011537m|PAC4GC:7355196|jam2.L	KVVPNGDISFIYYN#NTLAAGLR	KVVPNGDISFIYYN(0.973)NTLAAGLR	17437000	0.00486705
gnl|Xelaev18011537m|PAC4GC:7355196|jam2.L	LTN#SSYTVNSASGTLQFNTVAK	LTN(1)SSYTVNSASGTLQFNTVAK	2967700	0.000828351
gnl|Xelaev18011568m|PAC4GC:7355131|cadm2.L	ELTISFLN#KTDN#GTYR	ELTISFLN(1)KTDN(1)GTYR	15248000	0.00425605
gnl|Xelaev18011589m|PAC4GC:7353219|cxadr.L	NTPAITPDATTGFVPIKN#ASQEYSGTYR	NTPAITPDATTGFVPIKN(1)ASQEYSGTYR	378010000	0.105511
gnl|Xelaev18011591m|PAC4GC:7354356|st3gal6.L	LILN#MSEIDPFLCQDIRK	LILN(1)MSEIDPFLCQDIRK	14295000	0.00399005
gnl|Xelaev18011668m|PAC4GC:7354639|cpd.L	ITGLYSN#SSDDKVFK	ITGLYSN(1)SSDDKVFK	494220000	0.137948
gnl|Xelaev18011668m|PAC4GC:7354639|cpd.L	GIENAVISVAGIDHN#ITTGK	GIENAVISVAGIDHN(1)ITTGK	242330000	0.0676397
gnl|Xelaev18011668m|PAC4GC:7354639|cpd.L	LLN#TTDIYIVPSLNPDGFEK	LLN(1)TTDIYIVPSLNPDGFEK	196670000	0.0548949
gnl|Xelaev18011668m|PAC4GC:7354639|cpd.L	GLNLNYPHITN#LTSLGQSVEFR	GLNLNYPHITN(1)LTSLGQSVEFR	148100000	0.041338
gnl|Xelaev18011668m|PAC4GC:7354639|cpd.L	DLDCDFISN#SSGPVGER	DLDCDFISN(1)SSGPVGER	45011000	0.0125636
gnl|Xelaev18011668m|PAC4GC:7354639|cpd.L	EAVLVN#FTLVR	EAVLVN(1)FTLVR	10240000	0.00285821
gnl|Xelaev18011668m|PAC4GC:7354639|cpd.L	HIWSLEISNKPN#TSEPSEPK	HIWSLEISNKPN(0.904)TSEPSEPK	7347300	0.00205079
gnl|Xelaev18011668m|PAC4GC:7354639|cpd.L	LLAPGLYN#ITASGAGYLTETLVDVDVK	LLAPGLYN(1)ITASGAGYLTETLVDVDVK	5100100	0.00142355
gnl|Xelaev18011713m|PAC4GC:7355303|slc46a1.L	LSADIGFN#GTR	LSADIGFN(1)GTR	83967000	0.023437
gnl|Xelaev18011732m|PAC4GC:7354474|serpinf2.L	LLANFN#QSDLYSR	LLANFN(1)QSDLYSR	457730000	0.127763
gnl|Xelaev18011823m|PAC4GC:7353719|mpo.L	N#ETELATVLR	N(1)ETELATVLR	161780000	0.0451564
gnl|Xelaev18011823m|PAC4GC:7353719|mpo.L	FTDGGLPYLPFGTMKEDFCLLTN#MSSGLPCFLAGDAR	FTDGGLPYLPFGTMKEDFCLLTN(1)MSSGLPCFLAGDAR	43276000	0.0120793
gnl|Xelaev18011856m|PAC4GC:7353171|phex.L	LAQITVPQEN#R.T	LAQITVPQEN(1)R.T	136560000	0.0381169
gnl|Xelaev18011856m|PAC4GC:7353171|phex.L	LDQASLSLLSHEDYLDN#STIAK	LDQASLSLLSHEDYLDN(1)STIAK	37297000	0.0104104
gnl|Xelaev18011856m|PAC4GC:7353171|phex.L	VGYPEFLFN#ETYLNEDIK	VGYPEFLFN(1)ETYLNEDIK	28151000	0.00785757
gnl|Xelaev18011935m|PAC4GC:7353533|epx.L	FPNEN#LTLDEGR	FPNEN(1)LTLDEGR	576120000	0.160808
gnl|Xelaev18011935m|PAC4GC:7353533|epx.L	ISN#QSDCIPLFR	ISN(1)QSDCIPLFR	466520000	0.130216
gnl|Xelaev18011935m|PAC4GC:7353533|epx.L	FTDNGLPFLPFETAEEDFCVLTN#R.S	FTDNGLPFLPFETAEEDFCVLTN(1)R.S	179480000	0.0500968
gnl|Xelaev18011953m|PAC4GC:7354495|hsd11b1.L	VVAQCTQLGAASAHYIAGSMDN#LTFAK	VVAQCTQLGAASAHYIAGSMDN(1)LTFAK	153190000	0.0427587
gnl|Xelaev18011974m|PAC4GC:7354232|plxna2.L	LSGN#LTLLVSHNTGPGEDNK	LSGN(1)LTLLVSHNTGPGEDNK	10105000	0.00282053
gnl|Xelaev18011985m|PAC4GC:7353094|tspan2.L	AFQEN#GTKNNTLSSVHEMAK	AFQEN(0.974)GTKNNTLSSVHEMAK	74642000	0.0208342
gnl|Xelaev18012057m|PAC4GC:7354269|nkain1.L	DLIMNFN#TSMHR	DLIMNFN(0.981)TSMHR	49686000	0.0138685
gnl|Xelaev18012120m|PAC4GC:7355262|thdl17.L	DRYN#STNLHLVDSACQLK	DRYN(0.963)STNLHLVDSACQLK	39137000	0.010924
gnl|Xelaev18012120m|PAC4GC:7355262|thdl17.L	NGECGNNLIVN#STHVTYANK	NGECGNNLIVN(0.996)STHVTYANK	12126000	0.00338463
gnl|Xelaev18012128m|PAC4GC:7354162|Xetrov90004771m.L	LVPLTLNTVTGCIN#GSSIPVK	LVPLTLNTVTGCIN(1)GSSIPVK	18336000	0.00511798
gnl|Xelaev18012141m|PAC4GC:7353941|Xelaev18012141m	NSLYIGVQN#K.S	NSLYIGVQN(1)K.S	144710000	0.0403918
gnl|Xelaev18012142m|PAC4GC:7354586|Xelaev18012142m	NSLYIGIQN#K.S	NSLYIGIQN(1)K.S	205300000	0.0573038
gnl|Xelaev18012143m|PAC4GC:7354033|LOC101732853.L	NLLEFLNYKPSASSLLQPN#CTK	NLLEFLNYKPSASSLLQPN(1)CTK	4405600	0.0012297
gnl|Xelaev18012180m|PAC4GC:7354546|c3orf52-like.L	IN#ETTLQQR	IN(1)ETTLQQR	23857000	0.00665902
gnl|Xelaev18012216m|PAC4GC:7353520|pm20d1.L	IPTVSFSEEEQN#TTALR	IPTVSFSEEEQN(1)TTALR	44563000	0.0124385
gnl|Xelaev18012295m|PAC4GC:7355524|celsr2.L	ELLYLN#R.T	ELLYLN(1)R.T	17604000	0.00491367
gnl|Xelaev18012295m|PAC4GC:7355524|celsr2.L	QILN#VSLLVQGPEEFLPSEK	QILN(1)VSLLVQGPEEFLPSEK	1003800	0.000280183
gnl|Xelaev18012316m|PAC4GC:7354957|arc2.L	CGNPGEIQNGQIEEPIN#QTFGSR	CGNPGEIQNGQIEEPIN(1)QTFGSR	7847900	0.00219052
gnl|Xelaev18012318m|PAC4GC:7353241|arc3.L	LEFAQLGQGDIDKNIYLN#GTTVK	LEFAQLGQGDIDKNIYLN(1)GTTVK	144970000	0.0404643
gnl|Xelaev18012426m|PAC4GC:7354439|f5.L	MYHSAVN#ITK	MYHSAVN(1)ITK	12202000	0.00340585
gnl|Xelaev18012426m|PAC4GC:7354439|f5.L	EEGVN#LTALAIEHTNER	EEGVN(1)LTALAIEHTNER	6408400	0.00178873
gnl|Xelaev18012432m|PAC4GC:7354326|atp1b1.L	LLQPEYLQPLIAVQFTN#LTLDTEIR	LLQPEYLQPLIAVQFTN(1)LTLDTEIR	608720000	0.169907
gnl|Xelaev18012432m|PAC4GC:7354326|atp1b1.L	REWLQN#CSGLNDPTYGFAEGKPCVIVK	REWLQN(0.99)CSGLNDPTYGFAEGKPCVIVK	185340000	0.0517325
gnl|Xelaev18012480m|PAC4GC:7355918|matn1.L	VFLSQVIESLDVGAN#ATR	VFLSQVIESLDVGAN(1)ATR	68611000	0.0191508
gnl|Xelaev18012525m|PAC4GC:7353248|grik3.L	YSGVN#LTGFR	YSGVN(1)LTGFR	10886000	0.00303852
gnl|Xelaev18012525m|PAC4GC:7353248|grik3.L	VGTWNPSDGLN#ITEVAR	VGTWNPSDGLN(1)ITEVAR	4546700	0.00126908
gnl|Xelaev18012538m|PAC4GC:7355237|tor2a.L	GWIQGN#LTACGR	GWIQGN(1)LTACGR	1818400	0.000507556
gnl|Xelaev18012575m|PAC4GC:7355154|tmem30b.L	FRNPTSGN#ETLAYLK	FRNPTSGN(0.993)ETLAYLK	64226000	0.0179269
gnl|Xelaev18012624m|PAC4GC:7355191|fuca1.L	VQKEN#STVNLWYTSK	VQKEN(1)STVNLWYTSK	68546000	0.0191327
gnl|Xelaev18012631m|PAC4GC:7355421|ppt1.L	FLN#DTMVDPPDTEWFGFYKPGQSK	FLN(1)DTMVDPPDTEWFGFYKPGQSK	68174000	0.0190289
gnl|Xelaev18012631m|PAC4GC:7355421|ppt1.L	N#GSIFLADINQER	N(1)GSIFLADINQER	5233100	0.00146067
gnl|Xelaev18012707m|PAC4GC:7353354|LOC100485266.L	FVVLN#NTGIVAK	FVVLN(0.911)NTGIVAK	27838000	0.0077702
gnl|Xelaev18012708m|PAC4GC:7355577|LOC100485113.L	FVVLN#GTGMETGTR	FVVLN(1)GTGMETGTR	120080000	0.033517
gnl|Xelaev18012708m|PAC4GC:7355577|LOC100485113.L	VIPQLSYMELSNPAN#ISSFETNR	VIPQLSYMELSNPAN(0.996)ISSFETNR	25678000	0.0071673
gnl|Xelaev18012761m|PAC4GC:7353347|gusb.L	YAESFGN#QSLNHHLTVMEELVR	YAESFGN(0.997)QSLNHHLTVMEELVR	320800000	0.0895424
gnl|Xelaev18012761m|PAC4GC:7353347|gusb.L	NGN#GSVEDIYVLPVGIR	NGN(1)GSVEDIYVLPVGIR	18280000	0.00510235
gnl|Xelaev18012826m|PAC4GC:7353529|alcam.L	IIISPEEN#TTISCVAENR	IIISPEEN(1)TTISCVAENR	474810000	0.13253
gnl|Xelaev18012826m|PAC4GC:7353529|alcam.L	NRLELSEN#YTLSIANAVIDDEKR	NRLELSEN(1)YTLSIANAVIDDEKR	72027000	0.0201043
gnl|Xelaev18012826m|PAC4GC:7353529|alcam.L	EKN#SSSGLYSTHSSLQYLTTK	EKN(1)SSSGLYSTHSSLQYLTTK	58177000	0.0162385
gnl|Xelaev18012826m|PAC4GC:7353529|alcam.L	EGDN#ITLQCR	EGDN(1)ITLQCR	22737000	0.0063464
gnl|Xelaev18012874m|PAC4GC:7355282|gpm6b.L	ALPTN#LTTTADQICVDIR	ALPTN(1)LTTTADQICVDIR	93437000	0.0260803
gnl|Xelaev18012913m|PAC4GC:7354236|cybb.L	VEAN#GTIQAALTSLGDRDGESYLNFVR	VEAN(1)GTIQAALTSLGDRDGESYLNFVR	7776100	0.00217048
gnl|Xelaev18013007m|PAC4GC:7355018|tmem131.L	EADN#HTAFIR	EADN(1)HTAFIR	16635000	0.0046432
gnl|Xelaev18013007m|PAC4GC:7355018|tmem131.L	ILPGGN#TSFDVVFLAR	ILPGGN(1)TSFDVVFLAR	11697000	0.00326489
gnl|Xelaev18013007m|PAC4GC:7355018|tmem131.L	FTPVQN#QTVSSLLIVR	FTPVQN(1)QTVSSLLIVR	6903500	0.00192692
gnl|Xelaev18013014m|PAC4GC:7354223|gabrb3.L	LAYTGIPLN#LTLDNR	LAYTGIPLN(0.992)LTLDNR	11994000	0.00334779
gnl|Xelaev18013029m|PAC4GC:7355118|slc9a7.L	AFTTILVN#VSGK	AFTTILVN(1)VSGK	17134000	0.00478248
gnl|Xelaev18013051m|PAC4GC:7354635|lamp1.L	VGLQMN#ITYTTK	VGLQMN(1)ITYTTK	1490500000	0.416031
gnl|Xelaev18013051m|PAC4GC:7354635|lamp1.L	MDNAN#ATFHDIR	MDNAN(1)ATFHDIR	1462900000	0.408328
gnl|Xelaev18013051m|PAC4GC:7354635|lamp1.L	IIFPN#ASEN#GTK	IIFPN(1)ASEN(1)GTK	1022000000	0.285263
gnl|Xelaev18013051m|PAC4GC:7354635|lamp1.L	DGKN#GSYVFNIESK	DGKN(1)GSYVFNIESK	213240000	0.05952
gnl|Xelaev18013051m|PAC4GC:7354635|lamp1.L	GVTVDGN#CTN#TTAYLSLSTGSIDLR	GVTVDGN(1)CTN(1)TTAYLSLSTGSIDLR	26230000	0.00732137
gnl|Xelaev18013056m|PAC4GC:7355713|f10.L	ELILTAAHCIN#QTK	ELILTAAHCIN(1)QTK	175280000	0.0489245
gnl|Xelaev18013138m|PAC4GC:7353635|uggt2.L	N#ITASSVNGLKHDEL	N(1)ITASSVNGLKHDEL	284550000	0.0794242
gnl|Xelaev18013152m|PAC4GC:7353291|dct.L	LVTLCN#GTNEGFLQR	LVTLCN(1)GTNEGFLQR	644190000	0.179808
gnl|Xelaev18013152m|PAC4GC:7353291|dct.L	FFN#STCR	FFN(1)STCR	141870000	0.0395991
gnl|Xelaev18013152m|PAC4GC:7353291|dct.L	MIGN#ESFALPYWNFATGR	MIGN(1)ESFALPYWNFATGR	3630100	0.00101324
gnl|Xelaev18013223m|PAC4GC:7353548|pcdh17.L	NLNYSVPDEVGAGTLIGN#ISK	NLNYSVPDEVGAGTLIGN(1)ISK	2798100	0.000781012
gnl|Xelaev18013284m|PAC4GC:7355137|itm2b.L	CYVIPLN#TSIVMPPK	CYVIPLN(1)TSIVMPPK	11118000	0.00310328
gnl|Xelaev18013342m|PAC4GC:7353676|itga7.L	AN#HTGAVVILQR	AN(1)HTGAVVILQR	253830000	0.0708496
gnl|Xelaev18013342m|PAC4GC:7353676|itga7.L	LWN#SSLLEEYPSVSSLEVAVR	LWN(1)SSLLEEYPSVSSLEVAVR	45772000	0.012776
gnl|Xelaev18013342m|PAC4GC:7353676|itga7.L	LN#GSDGSMFGIAIGSLGDINQDGFKDVAIGAPYDGNGK	LN(0.997)GSDGSMFGIAIGSLGDINQDGFKDVAIGAPYDGNGK	4656400	0.0012997
gnl|Xelaev18013345m|PAC4GC:7353944|cd63.L	CCGAFN#STDWK	CCGAFN(1)STDWK	186150000	0.0519586
gnl|Xelaev18013345m|PAC4GC:7353944|cd63.L	YN#NTKEMADSIDLLQK	YN(0.907)NTKEMADSIDLLQK	134750000	0.0376117
gnl|Xelaev18013345m|PAC4GC:7353944|cd63.L	QYAPFVGTTNVPDSCCKN#ITAGCGK	QYAPFVGTTNVPDSCCKN(0.991)ITAGCGK	84817000	0.0236743
gnl|Xelaev18013426m|PAC4GC:7355483|lrp1.L	LSLGGTN#YTLIK	LSLGGTN(1)YTLIK	94941000	0.0265001
gnl|Xelaev18013426m|PAC4GC:7355483|lrp1.L	RGNKDN#ATDSVSLR	RGNKDN(0.999)ATDSVSLR	42212000	0.0117823
gnl|Xelaev18013426m|PAC4GC:7355483|lrp1.L	LYWTDGDN#ISIANMDGSDHK	LYWTDGDN(1)ISIANMDGSDHK	10551000	0.00294502
gnl|Xelaev18013452m|PAC4GC:7355393|os9.L	YHSQMYVN#GSK	YHSQMYVN(1)GSK	28661000	0.00799992
gnl|Xelaev18013525m|PAC4GC:7353920|tmem106c.L	QVN#FTVK	QVN(1)FTVK	9284300	0.00259145
gnl|Xelaev18013548m|PAC4GC:7353827|itga5.L	NNEHLLILPCAYEMEN#QTR	NNEHLLILPCAYEMEN(1)QTR	17157000	0.0047889
gnl|Xelaev18013548m|PAC4GC:7353827|itga5.L	AQIQLDCGEDNICVPDLKLN#VSGDRK	AQIQLDCGEDNICVPDLKLN(0.999)VSGDRK	15111000	0.00421781
gnl|Xelaev18013548m|PAC4GC:7353827|itga5.L	LSPIYVGLN#FSLDPLAPADAHGLMPIFNYK	LSPIYVGLN(0.999)FSLDPLAPADAHGLMPIFNYK	9276600	0.0025893
gnl|Xelaev18013626m|PAC4GC:7355825|krt5.7.L	AGGN#FSSSSLSNLGSVK	AGGN(1)FSSSSLSNLGSVK	21245000	0.00592995
gnl|Xelaev18013693m|PAC4GC:7354974|frem2.L	ATVFIN#DTVSDLPK	ATVFIN(1)DTVSDLPK	171200000	0.0477857
gnl|Xelaev18013693m|PAC4GC:7354974|frem2.L	YSDYDKTGSICTSENIN#NTLTR	YSDYDKTGSICTSENIN(0.921)NTLTR	62278000	0.0173832
gnl|Xelaev18013864m|PAC4GC:7355685|hephl1.L	NLINGLNI#TEDK	NLINGLN(1)ITEDK	17100000	0.00477299
gnl|Xelaev18013864m|PAC4GC:7355685|hephl1.L	QIYVVATCN#DSYTER	QIYVVATCN(1)DSYTER	5019800	0.00140114
gnl|Xelaev18013901m|PAC4GC:7355283|ctsc.L	GSN#ITSYCHETFPGWVHDVLGR	GSN(1)ITSYCHETFPGWVHDVLGR	37841000	0.0105623
gnl|Xelaev18013901m|PAC4GC:7355283|ctsc.L	IQIQSQLSQKPILSPQQVVSCSN#YSQGCDGGFPYLIAGK	IQIQSQLSQKPILSPQQVVSCSN(1)YSQGCDGGFPYLIAGK	26840000	0.00749164
gnl|Xelaev18013904m|PAC4GC:7354377|folh1.L	HYLHN#FSQVPHLAGTEENLR	HYLHN(1)FSQVPHLAGTEENLR	219350000	0.0612254
gnl|Xelaev18013904m|PAC4GC:7354377|folh1.L	LLEYNVSFEPLFSAAAN#FTESVK	LLEYNVSFEPLFSAAAN(1)FTESVK	9866700	0.00275401
gnl|Xelaev18013979m|PAC4GC:7353202|tpp1.L	LPPSTYYN#GSGR	LPPSTYYN(1)GSGR	1118700000	0.312254
gnl|Xelaev18013994m|PAC4GC:7354994|umod.2.L	GKN#ITGELSQLHEK	GKN(1)ITGELSQLHEK	110230000	0.0307676
gnl|Xelaev18013995m|PAC4GC:7353918|smpd1.L	VYQIDGEYPGSSHMVLDHETYILN#LTEANAQPTLEPR	VYQIDGEYPGSSHMVLDHETYILN(1)LTEANAQPTLEPR	14635000	0.00408495
gnl|Xelaev18014025m|PAC4GC:7355166|tenm4.L	LTN#VTFPTGQVSSFR	LTN(1)VTFPTGQVSSFR	4766500	0.00133044
gnl|Xelaev18014029m|PAC4GC:7354809|prcp.L	N#ISSHSNIIFSNGGLDPWSAGGVK	N(1)ISSHSNIIFSNGGLDPWSAGGVK	71910000	0.0200717
gnl|Xelaev18014052m|PAC4GC:7354124|serpinh1.L	LSDEHIHSGLAELLNEVSN#STAR	LSDEHIHSGLAELLNEVSN(1)STAR	433210000	0.120918
gnl|Xelaev18014131m|PAC4GC:7350611|sts.S	IIQQPLVFDN#LTQR	IIQQPLVFDN(1)LTQR	54530000	0.0152205
gnl|Xelaev18014134m|PAC4GC:7352984|anos1.S	ISN#LTTNNEGTVSVR	ISN(1)LTTNNEGTVSVR	51211000	0.0142941
gnl|Xelaev18014136m|PAC4GC:7351082|serpinf2.S	LLANFN#QTDLYSR	LLANFN(0.993)QTDLYSR	370190000	0.103328
gnl|Xelaev18014180m|PAC4GC:7350700|cpd.S	VTHLLN#GTDVYIVPSLNPDGFEK	VTHLLN(1)GTDVYIVPSLNPDGFEK	85493000	0.023863
gnl|Xelaev18014180m|PAC4GC:7350700|cpd.S	GIENAVISVGGIGHN#ITTGK	GIENAVISVGGIGHN(1)ITTGK	60391000	0.0168565
gnl|Xelaev18014180m|PAC4GC:7350700|cpd.S	DLDIDFISN#SSGPVGER	DLDIDFISN(1)SSGPVGER	29663000	0.0082796
gnl|Xelaev18014180m|PAC4GC:7350700|cpd.S	LLAPGLYN#ITASGTGYLPETLVDVEVK	LLAPGLYN(1)ITASGTGYLPETLVDVEVK	16022000	0.00447209
gnl|Xelaev18014180m|PAC4GC:7350700|cpd.S	GIPN#ATISVASINHVVTSYK	GIPN(1)ATISVASINHVVTSYK	8912600	0.0024877
gnl|Xelaev18014239m|PAC4GC:7351745|robo1.S	NYLGEAVSHN#ASLEVAILR	NYLGEAVSHN(1)ASLEVAILR	7707300	0.00215128
gnl|Xelaev18014465m|PAC4GC:7351699|fstl1.S	FDDGDSHLDSAELQSFLEQSQSTN#ITTYKDEETNR	FDDGDSHLDSAELQSFLEQSQSTN(1)ITTYKDEETNR	109670000	0.0306113
gnl|Xelaev18014492m|PAC4GC:7351380|Xetrov90025900m.S	VFDVVQRPN#VTCTQEK	VFDVVQRPN(1)VTCTQEK	14873000	0.00415138
gnl|Xelaev18014494m|PAC4GC:7351096|igsf3.S	ISGGEEHEIISLTQN#LSVR	ISGGEEHEIISLTQN(1)LSVR	80678000	0.022519
gnl|Xelaev18014539m|PAC4GC:7350843|mpo.S	MNPN#WTGEVLFQETR	MNPN(0.992)WTGEVLFQETR	9874000	0.00275605
gnl|Xelaev18014599m|PAC4GC:7352304|gla.S	KIN#YTEVAEYCNSWR	KIN(1)YTEVAEYCNSWR	61295000	0.0171088
gnl|Xelaev18014599m|PAC4GC:7352304|gla.S	QMSVALN#R.T	QMSVALN(1)R.T	39483000	0.0110206
gnl|Xelaev18014674m|PAC4GC:7350807|tspan2.S	N#GSKN#TTLSGLHK	N(1)GSKN(1)TTLSGLHK	9213000	0.00257155
gnl|Xelaev18014713m|PAC4GC:7351078|atp1b1.S	REWLQN#CSGLNDPSYGFADGKPCVIVK	REWLQN(0.996)CSGLNDPSYGFADGKPCVIVK	55748000	0.0155605
gnl|Xelaev18014713m|PAC4GC:7351078|atp1b1.S	LLQPDYLQPLIAVQFTN#ITFDAEVR	LLQPDYLQPLIAVQFTN(1)ITFDAEVR	17320000	0.00483439
gnl|Xelaev18014761m|PAC4GC:7352968|tspan7.S	N#MTINFTK	N(1)MTINFTK	98423000	0.027472
gnl|Xelaev18014830m|PAC4GC:7352254|nfasc.S	AVLETLSPN#QTK	AVLETLSPN(1)QTK	98083000	0.0273771
gnl|Xelaev18014830m|PAC4GC:7352254|nfasc.S	VHEN#GTLEINTVR	VHEN(1)GTLEINTVR	91479000	0.0255338
gnl|Xelaev18014830m|PAC4GC:7352254|nfasc.S	NNMEITWTPLN#STQAYGPNLR	NNMEITWTPLN(1)STQAYGPNLR	10562000	0.00294809
gnl|Xelaev18014909m|PAC4GC:7350635|amo1.S	ELTLVPSGLPN#YTAVLDLSHNMLSR	ELTLVPSGLPN(1)YTAVLDLSHNMLSR	4772900	0.00133222
gnl|Xelaev18014987m|PAC4GC:7352213|kiaa1324.S	IYSIN#ITNTK	IYSIN(1)ITNTK	80935000	0.0225907
gnl|Xelaev18014987m|PAC4GC:7352213|kiaa1324.S	YN#FSSLPN#VTSFSGPPSFTTK	YN(1)FSSLPN(1)VTSFSGPPSFTTK	10052000	0.00280574
gnl|Xelaev18014998m|PAC4GC:7351314|c3orf52-like.S	LN#FSMPSANQNER	LN(1)FSMPSANQNER	36970000	0.0103191
gnl|Xelaev18015052m|PAC4GC:7350791|Xelaev18015052m	VVNMYVSN#SSNPSADPR	VVNMYVSN(0.994)SSNPSADPR	41889000	0.0116921
gnl|Xelaev18015054m|PAC4GC:7352644|Xelaev18015054m	DRYN#STSLHLK	DRYN(1)STSLHLK	28243000	0.00788325
gnl|Xelaev18015125m|PAC4GC:7350744|smpdl3b.S	VLIN#SSIYAMK	VLIN(1)SSIYAMK	4304900	0.00120159
gnl|Xelaev18015133m|PAC4GC:7352175|LOC100485534.S	VAN#ATATEVR	VAN(1)ATATEVR	73308000	0.0204619
gnl|Xelaev18015133m|PAC4GC:7352175|LOC100485534.S	QVPAMEN#YTMQER	QVPAMEN(1)YTMQER	23847000	0.00665622
gnl|Xelaev18015134m|PAC4GC:7352322|LOC100485272-like.S	LTDVETQVLN#QTSR	LTDVETQVLN(1)QTSR	10052000	0.00280574
gnl|Xelaev18015166m|PAC4GC:7352357|matn1.S	VFLSQVIESLDVGFN#ATR	VFLSQVIESLDVGFN(1)ATR	2094700	0.000584677
gnl|Xelaev18015295m|PAC4GC:7351329|ca4.S	NFSAN#LTK	NFSAN(1)LTK	67987000	0.0189767
gnl|Xelaev18015295m|PAC4GC:7351329|ca4.S	AFYNSLN#FTENQR	AFYNSLN(0.999)FTENQR	16443000	0.0045896
gnl|Xelaev18015364m|PAC4GC:7352171|gusb.S	NVN#GSVEDIYVLPVGIR	NVN(1)GSVEDIYVLPVGIR	30547000	0.00852634
gnl|Xelaev18015410m|PAC4GC:7351340|alcam.S	IIISPEEN#TTVICVAENR	IIISPEEN(1)TTVICVAENR	418240000	0.11674
gnl|Xelaev18015410m|PAC4GC:7351340|alcam.S	DSYPDGN#ITWYR	DSYPDGN(1)ITWYR	177060000	0.0494214
gnl|Xelaev18015410m|PAC4GC:7351340|alcam.S	EGDN#ITIQCK	EGDN(1)ITIQCK	21894000	0.0061111
gnl|Xelaev18015444m|PAC4GC:7351372|im2.S	LHEQMLLEN#R.T	LHEQMLLEN(1)R.T	50664000	0.0141414
gnl|Xelaev18015447m|PAC4GC:7352782|Xelaev18015447m	VHIN#ATGNTLVMK	VHIN(1)ATGNTLVMK	208600000	0.0582249
gnl|Xelaev18015449m|PAC4GC:7351311|Xetrov90005752m.S	YMGKN#ESVPCSITESLR	YMGKN(1)ESVPCSITESLR	3942900	0.00110055
gnl|Xelaev18015453m|PAC4GC:7350871|gpm6b.S	ILPTN#LTTTADQICVDIR	ILPTN(1)LTTTADQICVDIR	99110000	0.0276638
gnl|Xelaev18015500m|PAC4GC:7351516|uxs1.S	LLLGWEPVVPLEEGLN#K.T	LLLGWEPVVPLEEGLN(1)K.T	12167000	0.00339608
gnl|Xelaev18015514m|PAC4GC:7352478|tmem182.S	N#CTHAYLSPFPQNR	N(1)CTHAYLSPFPQNR	56080000	0.0156532
gnl|Xelaev18015578m|PAC4GC:7351181|atp4b.S	IINFVPGN#K.T	IINFVPGN(0.999)K.T	87228000	0.0243473
gnl|Xelaev18015578m|PAC4GC:7351181|atp4b.S	MQPN#YTNPLVAVK	MQPN(0.997)YTNPLVAVK	83974000	0.023439
gnl|Xelaev18015585m|PAC4GC:7352498|lamp1.S	MEN#VTATFHDIKLEAYLK	MEN(1)VTATFHDIKLEAYLK	5561500000	1.55234
gnl|Xelaev18015585m|PAC4GC:7352498|lamp1.S	FALPSDAVTN#ISK	FALPSDAVTN(1)ISK	5451100000	1.52152
gnl|Xelaev18015585m|PAC4GC:7352498|lamp1.S	DGKN#ASYVFNIDSK	DGKN(1)ASYVFNIDSK	2388200000	0.666599
gnl|Xelaev18015585m|PAC4GC:7352498|lamp1.S	NFFPGSSEN#GTK	NFFPGSSEN(1)GTK	1100500000	0.307174
gnl|Xelaev18015585m|PAC4GC:7352498|lamp1.S	YQVADLVMSYN#LSDK	YQVADLVMSYN(1)LSDK	342050000	0.0954737
gnl|Xelaev18015585m|PAC4GC:7352498|lamp1.S	DGKTN#LTCILADLSIN#FTVPYSN#ASKQELAK	DGKTN(1)LTCILADLSIN(1)FTVPYSN(1)ASKQELAK	69224000	0.0193219
gnl|Xelaev18015590m|PAC4GC:7351000|f7.S	LTIPVN#YTDYVVPLCLPEK	LTIPVN(1)YTDYVVPLCLPEK	12708000	0.00354708
gnl|Xelaev18015729m|PAC4GC:7352536|pcdh9.S	IDPVTGN#ITLEEKPSAADVGLHR	IDPVTGN(1)ITLEEKPSAADVGLHR	20234000	0.00564776
gnl|Xelaev18015729m|PAC4GC:7352536|pcdh9.S	YIISPIN#GTVYLSEKDPINTK	YIISPIN(1)GTVYLSEKDPINTK	16624000	0.00464013
gnl|Xelaev18015783m|PAC4GC:7352271|cpb2.S	DAQELIEQQTFN#DTSNQR	DAQELIEQQTFN(1)DTSNQR	159850000	0.0446177
gnl|Xelaev18015783m|PAC4GC:7352271|cpb2.S	AQLN#QSSIMYTVLVK	AQLN(1)QSSIMYTVLVK	9851000	0.00274963
gnl|Xelaev18015849m|PAC4GC:7351290|cd63.S	YN#TTKDITESIDLLQK	YN(1)TTKDITESIDLLQK	525310000	0.146626
gnl|Xelaev18015849m|PAC4GC:7351290|cd63.S	QYPPFN#GTDAVPDSCCK	QYPPFN(1)GTDAVPDSCCK	267750000	0.0747349
gnl|Xelaev18015849m|PAC4GC:7351290|cd63.S	CCGAFN#ATDWK	CCGAFN(1)ATDWK	133370000	0.0372265
gnl|Xelaev18015849m|PAC4GC:7351290|cd63.S	NGMSKYN#TTKDITESIDLLQK	NGMSKYN(1)TTKDITESIDLLQK	97433000	0.0271957
gnl|Xelaev18015916m|PAC4GC:7351739|lrp1.S	LN#GTDPVVAISNKK	LN(1)GTDPVVAISNKK	1139900000	0.318171
gnl|Xelaev18015916m|PAC4GC:7351739|lrp1.S	VNRFN#SSDYNVVTR	VNRFN(1)SSDYNVVTR	1041100000	0.290594
gnl|Xelaev18015916m|PAC4GC:7351739|lrp1.S	MHIN#GSNVQVLHR	MHIN(1)GSNVQVLHR	312640000	0.0872647
gnl|Xelaev18015916m|PAC4GC:7351739|lrp1.S	CNLN#GTGLEVIGTMK	CNLN(1)GTGLEVIGTMK	195970000	0.0546996
gnl|Xelaev18015916m|PAC4GC:7351739|lrp1.S	AFIN#GTGVETVVSADLPNAHGLAVDWVSR	AFIN(1)GTGVETVVSADLPNAHGLAVDWVSR	171410000	0.0478443
gnl|Xelaev18015916m|PAC4GC:7351739|lrp1.S	LSLGGSN#YTLLK	LSLGGSN(1)YTLLK	71182000	0.0198685
gnl|Xelaev18015916m|PAC4GC:7351739|lrp1.S	LYWTDSDN#ISIANMDGSDRK	LYWTDSDN(1)ISIANMDGSDRK	21015000	0.00586575
gnl|Xelaev18015916m|PAC4GC:7351739|lrp1.S	RGHKDN#ATDSVPLR	RGHKDN(1)ATDSVPLR	14631000	0.00408384
gnl|Xelaev18015916m|PAC4GC:7351739|lrp1.S	FGHGPVTN#LTWGINHVTDVVLHHQYK	FGHGPVTN(1)LTWGINHVTDVVLHHQYK	12955000	0.00361603
gnl|Xelaev18015955m|PAC4GC:7352303|tspan31.S	LNLEETLECCGFLN#TTEAR	LNLEETLECCGFLN(1)TTEAR	5030100	0.00140401
gnl|Xelaev18015971m|PAC4GC:7351353|cela1.S	VILGEHN#LSVNEGPEQIIAVSQIVK	VILGEHN(1)LSVNEGPEQIIAVSQIVK	44240000	0.0123484
gnl|Xelaev18015990m|PAC4GC:7351799|col2a1.S	LLSTDASQN#ITYHCK	LLSTDASQN(1)ITYHCK	802040000	0.223867
gnl|Xelaev18016008m|PAC4GC:7350806|itga5.S	VLGN#STQPEHMESK	VLGN(1)STQPEHMESK	8325900	0.00232394
gnl|Xelaev18016144m|PAC4GC:7351938|frem2.S	ATVLIN#DTVSDLPK	ATVLIN(1)DTVSDLPK	81950000	0.0228741
gnl|Xelaev18016147m|PAC4GC:7351985|postn.S	AIN#NTLSVNGVVSK	AIN(0.927)NTLSVNGVVSK	426560000	0.119062
gnl|Xelaev18016228m|PAC4GC:7351904|sgcg.S	VDDSLLLHSSQN#ITVNAR	VDDSLLLHSSQN(0.998)ITVNAR	101440000	0.0283141
gnl|Xelaev18016272m|PAC4GC:7352661|Xelaev18016272m	RVN#YTMDVLELK	RVN(1)YTMDVLELK	5695900	0.00158985
gnl|Xelaev18016334m|PAC4GC:7352482|LOC100495486.S	ITATDGETFADPMYVN#ITVVHGK	ITATDGETFADPMYVN(1)ITVVHGK	11306000	0.00315575
gnl|Xelaev18016338m|PAC4GC:7352859|naalad2.S	LVYN#LTK	LVYN(1)LTK	12694000	0.00354318
gnl|Xelaev18016340m|PAC4GC:7350768|tyr.S	ILCN#GTAEGPLLR	ILCN(1)GTAEGPLLR	449880000	0.125571
gnl|Xelaev18016340m|PAC4GC:7350768|tyr.S	FGFRGPN#CTER	FGFRGPN(1)CTER	101430000	0.0283114
gnl|Xelaev18016340m|PAC4GC:7350768|tyr.S	LTGDEN#FTIPFWDWR	LTGDEN(1)FTIPFWDWR	94945000	0.0265012
gnl|Xelaev18016343m|PAC4GC:7351247|ctsc.S	GSN#VTSYCHETFPGWVHDVLGR	GSN(1)VTSYCHETFPGWVHDVLGR	102220000	0.0285319
gnl|Xelaev18016363m|PAC4GC:7352521|tenm4.S	VGPYAN#TTR	VGPYAN(1)TTR	20286000	0.00566227
gnl|Xelaev18016363m|PAC4GC:7352521|tenm4.S	LNGVN#VTYSPGGHVAGIQR	LNGVN(1)VTYSPGGHVAGIQR	9491700	0.00264934
gnl|Xelaev18016363m|PAC4GC:7352521|tenm4.S	LTN#VTFPTGLVSSFR	LTN(1)VTFPTGLVSSFR	4416100	0.00123263
gnl|Xelaev18016398m|PAC4GC:7352534|wnt11.S	WN#CSSIELAPTFHQDLER	WN(1)CSSIELAPTFHQDLER	12229000	0.00341338
gnl|Xelaev18016500m|PAC4GC:7350998|stim1.S	LAITN#ATMTGSLLK	LAITN(1)ATMTGSLLK	72412000	0.0202118
gnl|Xelaev18016563m|PAC4GC:7352678|dchs1.S	LDISILDINDHAPVFN#QSR	LDISILDINDHAPVFN(1)QSR	74443000	0.0207787
gnl|Xelaev18016563m|PAC4GC:7352678|dchs1.S	IHLLDVNDNEPVFSSPVYN#ATLSEGTAR	IHLLDVNDNEPVFSSPVYN(1)ATLSEGTAR	67624000	0.0188754
gnl|Xelaev18016563m|PAC4GC:7352678|dchs1.S	GYN#LTVLAMDHGSPR	GYN(1)LTVLAMDHGSPR	6623700	0.00184882
gnl|Xelaev18016668m|PAC4GC:7342528|upk3a.L	VIASN#YTGTQGGLLGPYQVAK	VIASN(1)YTGTQGGLLGPYQVAK	1952000000	0.544846
gnl|Xelaev18016744m|PAC4GC:7343881|ergic2.L	GHAHLAALVSHDSYN#FSHR	GHAHLAALVSHDSYN(1)FSHR	157170000	0.0438696
gnl|Xelaev18016852m|PAC4GC:7342504|ckap4.L	EKFTELN#NSLNDGIK	EKFTELN(0.999)NSLNDGIK	2323500000	0.64854
gnl|Xelaev18016902m|PAC4GC:7344573|vwf.L	LLDMHN#ITIK	LLDMHN(1)ITIK	201980000	0.0563771
gnl|Xelaev18016986m|PAC4GC:7344746|gabrb2.L	LSYSVIPLN#LTLDNR	LSYSVIPLN(0.998)LTLDNR	7685500	0.00214519
gnl|Xelaev18017162m|PAC4GC:7343706|p4ha2.L	GFIAN#LTFQR	GFIAN(1)LTFQR	130360000	0.0363864
gnl|Xelaev18017220m|PAC4GC:7344583|pcyox1l.L	VVSSVVHGYLN#SSFFGFPDPK	VVSSVVHGYLN(1)SSFFGFPDPK	19315000	0.00539124
gnl|Xelaev18017239m|PAC4GC:7343687|tlr22.L	LSSISTNTFQN#LTFLK	LSSISTNTFQN(1)LTFLK	8567100	0.00239127
gnl|Xelaev18017294m|PAC4GC:7342149|f12.L	FN#STDQHTVTLSAEK	FN(1)STDQHTVTLSAEK	168460000	0.0470209
gnl|Xelaev18017294m|PAC4GC:7342149|f12.L	YILHEN#YSGDTLQNDIALVK	YILHEN(1)YSGDTLQNDIALVK	99663000	0.0278181
gnl|Xelaev18017325m|PAC4GC:7344799|cdhr2.L	MEVEIVAN#DTGLK	MEVEIVAN(1)DTGLK	3294000	0.000919428
gnl|Xelaev18017331m|PAC4GC:7342353|lman2.L	VFPYISVMVNN#GSLEYDHSK	VFPYISVMVNN(0.944)GSLEYDHSK	36998000	0.010327
gnl|Xelaev18017372m|PAC4GC:7343121|gnptab.L	VPMLILDPSLPAN#TTLK	VPMLILDPSLPAN(1)TTLK	27735000	0.00774145
gnl|Xelaev18017372m|PAC4GC:7343121|gnptab.L	IHQLPLSLQDLTGLEQMLIN#CSK	IHQLPLSLQDLTGLEQMLIN(1)CSK	10712000	0.00298996
gnl|Xelaev18017384m|PAC4GC:7343473|hsp90b1.L	HNN#DTQHIWESDSNEFFVTDDPRGDTLGR	HNN(0.972)DTQHIWESDSNEFFVTDDPRGDTLGR	1543800000	0.430909
gnl|Xelaev18017384m|PAC4GC:7343473|hsp90b1.L	LGVIEDHSN#R.T	LGVIEDHSN(1)R.T	256510000	0.0715976
gnl|Xelaev18017384m|PAC4GC:7343473|hsp90b1.L	GVVDSDDLPLN#VSR	GVVDSDDLPLN(1)VSR	223480000	0.0623782
gnl|Xelaev18017388m|PAC4GC:7343508|stab2.L	NRCDLN#DTTLVLSK	NRCDLN(0.964)DTTLVLSK	33673000	0.00939888
gnl|Xelaev18017388m|PAC4GC:7343508|stab2.L	LHIIAGQMSSELFN#TTDLIYTLTGK	LHIIAGQMSSELFN(1)TTDLIYTLTGK	18370000	0.00512747
gnl|Xelaev18017388m|PAC4GC:7343508|stab2.L	NGGCSAYAVCN#HTGPAER	NGGCSAYAVCN(1)HTGPAER	8092000	0.00225866
gnl|Xelaev18017419m|PAC4GC:7345043|tmpo.L	LLLGITESN#KTEN	LLLGITESN(0.987)KTEN	1725200000	0.481541
gnl|Xelaev18017419m|PAC4GC:7345043|tmpo.L	GAAGRPLN#ATDLK	GAAGRPLN(1)ATDLK	25815000	0.00720554
gnl|Xelaev18017450m|PAC4GC:7343691|tmtc3.L	AN#ESRLEEADQLYR	AN(1)ESRLEEADQLYR	193130000	0.0539069
gnl|Xelaev18017463m|PAC4GC:7344368|kera.L	LGN#LTLLDLHHNK	LGN(1)LTLLDLHHNK	1268200000	0.353983
gnl|Xelaev18017463m|PAC4GC:7344368|kera.L	LGN#LTLLDLHHNKLTDSSFQADVFNGLK	LGN(0.951)LTLLDLHHNKLTDSSFQADVFNGLK	47173000	0.013167
gnl|Xelaev18017463m|PAC4GC:7344368|kera.L	LSDTGVPANVFN#MSSILDLQLSYNELTSVPIVNGHLER	LSDTGVPANVFN(0.966)MSSILDLQLSYNELTSVPIVNGHLER	28686000	0.0080069
gnl|Xelaev18017464m|PAC4GC:7344894|lum.L	LDGNN#ISR	LDGNN(1)ISR	1677800000	0.468311
gnl|Xelaev18017464m|PAC4GC:7344894|lum.L	LYISFNN#LTELVGPLPK	LYISFNN(1)LTELVGPLPK	786780000	0.219608
gnl|Xelaev18017464m|PAC4GC:7344894|lum.L	ITPNILEGLEN#LTHIYLQHNALK	ITPNILEGLEN(1)LTHIYLQHNALK	659590000	0.184106
gnl|Xelaev18017465m|PAC4GC:7343250|dcn.L	IITIEN#GTVSGVPHLR	IITIEN(1)GTVSGVPHLR	194480000	0.0542837
gnl|Xelaev18017465m|PAC4GC:7343250|dcn.L	IADTN#MTNIPK	IADTN(0.989)MTNIPK	146780000	0.0409695
gnl|Xelaev18017518m|PAC4GC:7342508|lemd3.L	CFSDPDSILN#ITSVK	CFSDPDSILN(1)ITSVK	27069000	0.00755556
gnl|Xelaev18017522m|PAC4GC:7345053|gns.L	AFLN#ASAPR	AFLN(1)ASAPR	836580000	0.233508
gnl|Xelaev18017522m|PAC4GC:7345053|gns.L	YPHNHHVLNNTIEGN#CSSK	YPHNHHVLNNTIEGN(0.997)CSSK	9063200	0.00252974
gnl|Xelaev18017599m|PAC4GC:7343085|mcoln1.L	KGHIDPAN#DTFNIDPK	KGHIDPAN(0.999)DTFNIDPK	30719000	0.00857435
gnl|Xelaev18017612m|PAC4GC:7342364|cntn1.L	AN#STGIVSVTAATK	AN(1)STGIVSVTAATK	147180000	0.0410812
gnl|Xelaev18017612m|PAC4GC:7342364|cntn1.L	GN#YSCFVSSPSVTK	GN(1)YSCFVSSPSVTK	19042000	0.00531504
gnl|Xelaev18017612m|PAC4GC:7342364|cntn1.L	VSIWDDGSLEITN#ITK	VSIWDDGSLEITN(1)ITK	10044000	0.0028035
gnl|Xelaev18017613m|PAC4GC:7344114|nrcam.L	FN#LTQTIHQK	FN(1)LTQTIHQK	186840000	0.0521512
gnl|Xelaev18017613m|PAC4GC:7344114|nrcam.L	VFYENFN#K.T	VFYENFN(0.992)K.T	41822000	0.0116734
gnl|Xelaev18017613m|PAC4GC:7344114|nrcam.L	DSSGN#YTCVATNTFGSVK	DSSGN(1)YTCVATNTFGSVK	12344000	0.00344548
gnl|Xelaev18017663m|PAC4GC:7342054|ptprz1.L	ADSKN#NTSLLITWR	ADSKN(1)NTSLLITWR	39029000	0.0108939
gnl|Xelaev18017675m|PAC4GC:7344667|hyal4.L	YIDGPLGHYLVN#VTAAAK	YIDGPLGHYLVN(1)VTAAAK	52390000	0.0146232
gnl|Xelaev18017675m|PAC4GC:7344667|hyal4.L	HLN#KSEHDINR	HLN(1)KSEHDINR	24988000	0.0069747
gnl|Xelaev18017685m|PAC4GC:7344643|plxnb2.L	MDGLESPLLTNELSSFYIPDPTFEN#FTDGIKK	MDGLESPLLTNELSSFYIPDPTFEN(1)FTDGIKK	131480000	0.036699
gnl|Xelaev18017685m|PAC4GC:7344643|plxnb2.L	FHTGDVFFAN#YSYPFYSCK	FHTGDVFFAN(1)YSYPFYSCK	5960000	0.00166357
gnl|Xelaev18017714m|PAC4GC:7344210|celsr1.L	FFHSEDLQEQIYLN#R.T	FFHSEDLQEQIYLN(1)R.T	34911000	0.00974443
gnl|Xelaev18017714m|PAC4GC:7344210|celsr1.L	LLDKNDNDPVLQDFEIIFNNYVTN#K.S	LLDKNDNDPVLQDFEIIFNNYVTN(0.987)K.S	21386000	0.00596931
gnl|Xelaev18017714m|PAC4GC:7344210|celsr1.L	LHRN#ETTLDGEK	LHRN(1)ETTLDGEK	9356800	0.00261169
gnl|Xelaev18017714m|PAC4GC:7344210|celsr1.L	VLQN#ATN#HTK	VLQN(1)ATN(1)HTK	2264700	0.000632128
gnl|Xelaev18017735m|PAC4GC:7342387|lamb4.L	IILTN#MTK	IILTN(1)MTK	64635000	0.0180411
gnl|Xelaev18017736m|PAC4GC:7342065|lamb1.L	LNAQDVLNKAN#ATK	LNAQDVLNKAN(0.999)ATK	465170000	0.129839
gnl|Xelaev18017736m|PAC4GC:7342065|lamb1.L	LAEIKTN#DTEKLDALQADAESFGQALK	LAEIKTN(1)DTEKLDALQADAESFGQALK	114520000	0.0319651
gnl|Xelaev18017736m|PAC4GC:7342065|lamb1.L	VN#VSVSNPDSVIEHSAATR	VN(1)VSVSNPDSVIEHSAATR	113290000	0.0316217
gnl|Xelaev18017756m|PAC4GC:7342835|sypl1.L	LNVQLFGGIPENFCN#ATWK	LNVQLFGGIPENFCN(0.993)ATWK	54685000	0.0152638
gnl|Xelaev18017773m|PAC4GC:7343478|reln.L	ISAPSN#VSTIIHIIYLPPEAK	ISAPSN(1)VSTIIHIIYLPPEAK	13587000	0.00379243
gnl|Xelaev18017810m|PAC4GC:7345059|kiaa1324l.L	MAVCTDN#ITDVTGK	MAVCTDN(1)ITDVTGK	158800000	0.0443246
gnl|Xelaev18017810m|PAC4GC:7345059|kiaa1324l.L	YYHLFN#MSLCGHGGEK	YYHLFN(1)MSLCGHGGEK	34647000	0.00967074
gnl|Xelaev18017852m|PAC4GC:7344551|itih2.L	GAFINN#FTMNVNGITFSGSIK	GAFINN(0.934)FTMNVNGITFSGSIK	35475000	0.00990186
gnl|Xelaev18017852m|PAC4GC:7344551|itih2.L	NI#TQTILQLSIDHHFVTPFTSLLIESENGNER	N(1)ITQTILQLSIDHHFVTPFTSLLIESENGNER	29675000	0.00828295
gnl|Xelaev18017852m|PAC4GC:7344551|itih2.L	KNSN#VTITVNENMK	KNSN(0.983)VTITVNENMK	5309600	0.00148203
gnl|Xelaev18017875m|PAC4GC:7344544|podxl.L	LTQNALHEALKN#LTDEGGK	LTQNALHEALKN(1)LTDEGGK	23141000	0.00645916
gnl|Xelaev18017887m|PAC4GC:7344127|LOC101732997.L	LQGTAQQELNQILLEN#TTSK	LQGTAQQELNQILLEN(1)TTSK	21633000	0.00603825
gnl|Xelaev18017931m|PAC4GC:7342108|opn1sw.L	N#VSNVSPFDGPQYHIAPK	N(0.992)VSNVSPFDGPQYHIAPK	76444000	0.0213372
gnl|Xelaev18017932m|PAC4GC:7342890|calu.L	N#VTYGTYLDDQDPDNSFNYK	N(1)VTYGTYLDDQDPDNSFNYK	118060000	0.0329532
gnl|Xelaev18017975m|PAC4GC:7343792|tspan3.L	AKVEDEVDNTIANVFNQYN#GTSPDSASR	AKVEDEVDNTIANVFNQYN(1)GTSPDSASR	68006000	0.018982
gnl|Xelaev18018026m|PAC4GC:7344249|neo1.L	GFAAVLN#CSAYADPTPK	GFAAVLN(1)CSAYADPTPK	66677000	0.018611
gnl|Xelaev18018026m|PAC4GC:7344249|neo1.L	MAN#STTLSYLVTGLK	MAN(1)STTLSYLVTGLK	6472300	0.00180656
gnl|Xelaev18018030m|PAC4GC:7344007|nptn.L	IIDGGLMEINN#ATGR	IIDGGLMEINN(1)ATGR	2217000000	0.618814
gnl|Xelaev18018030m|PAC4GC:7344007|nptn.L	NSPPAN#ATIEVK	NSPPAN(1)ATIEVK	661170000	0.184547
gnl|Xelaev18018030m|PAC4GC:7344007|nptn.L	ETSPTPIFLQCN#LTTTPNHVEPDSGFWTK	ETSPTPIFLQCN(0.962)LTTTPNHVEPDSGFWTK	186990000	0.052193
gnl|Xelaev18018030m|PAC4GC:7344007|nptn.L	FFITNKDN#YTELK	FFITNKDN(0.999)YTELK	168680000	0.0470823
gnl|Xelaev18018030m|PAC4GC:7344007|nptn.L	IINLDINNDPGTYLCN#ASNTVGSDN#STTILR	IINLDINNDPGTYLCN(0.91)ASNTVGSDN(0.999)STTILR	27968000	0.00780649
gnl|Xelaev18018031m|PAC4GC:7344765|cd276.L	IGLFHEELSKGN#MSLLLQR	IGLFHEELSKGN(1)MSLLLQR	13353000	0.00372712
gnl|Xelaev18018041m|PAC4GC:7344813|sema7a.L	EAVFQN#SSHYR	EAVFQN(1)SSHYR	19228000	0.00536696
gnl|Xelaev18018048m|PAC4GC:7342702|unnamed.L	FTTIPYN#ASQTYR	FTTIPYN(1)ASQTYR	105310000	0.0293943
gnl|Xelaev18018048m|PAC4GC:7342702|unnamed.L	AVLSN#NTLQISSK	AVLSN(0.93)NTLQISSK	78596000	0.0219379
gnl|Xelaev18018048m|PAC4GC:7342702|unnamed.L	IN#ISVDKSEIQFGVDK	IN(1)ISVDKSEIQFGVDK	68374000	0.0190847
gnl|Xelaev18018048m|PAC4GC:7342702|unnamed.L	MLIILAN#R.T	MLIILAN(1)R.T	16824000	0.00469595
gnl|Xelaev18018099m|PAC4GC:7344304|LOC100497279-like.L	ITSQEFTAN#LSK	ITSQEFTAN(1)LSK	1505600000	0.420246
gnl|Xelaev18018099m|PAC4GC:7344304|LOC100497279-like.L	FTNLNFNAN#LTNPSSDDYK	FTNLNFNAN(1)LTNPSSDDYK	707890000	0.197588
gnl|Xelaev18018099m|PAC4GC:7344304|LOC100497279-like.L	N#VTVTGFR	N(1)VTVTGFR	599570000	0.167353
gnl|Xelaev18018099m|PAC4GC:7344304|LOC100497279-like.L	VLASSIQQN#GSIGGFQVDTSTIK	VLASSIQQN(1)GSIGGFQVDTSTIK	577650000	0.161235
gnl|Xelaev18018099m|PAC4GC:7344304|LOC100497279-like.L	ALVSSIASN#GSFGDFK	ALVSSIASN(1)GSFGDFK	310970000	0.0867986
gnl|Xelaev18018099m|PAC4GC:7344304|LOC100497279-like.L	N#VSYTNSLSDK	N(1)VSYTNSLSDK	94086000	0.0262615
gnl|Xelaev18018099m|PAC4GC:7344304|LOC100497279-like.L	VDTNSIQSGSASVTNLSPEN#ITVGFLIK	VDTNSIQSGSASVTNLSPEN(0.999)ITVGFLIK	33564000	0.00936845
gnl|Xelaev18018099m|PAC4GC:7344304|LOC100497279-like.L	NIDLITN#ITDPTVPYSFTFK	NIDLITN(1)ITDPTVPYSFTFK	16964000	0.00473503
gnl|Xelaev18018108m|PAC4GC:7344457|LOC100496172.L	AVMLN#VTK	AVMLN(1)VTK	329830000	0.0920628
gnl|Xelaev18018113m|PAC4GC:7344873|LOC100485898-like.L	VVVLKN#ETAQVK	VVVLKN(1)ETAQVK	462830000	0.129186
gnl|Xelaev18018153m|PAC4GC:7342741|thsd4.L	IN#VTEMTK	IN(1)VTEMTK	29631000	0.00827067
gnl|Xelaev18018164m|PAC4GC:7344538|adam10.L	IN#VTSDEKDPTNPFR	IN(1)VTSDEKDPTNPFR	189150000	0.0527959
gnl|Xelaev18018164m|PAC4GC:7344538|adam10.L	N#ISQVLEK	N(1)ISQVLEK	3736000	0.0010428
gnl|Xelaev18018164m|PAC4GC:7344538|adam10.L	EN#LTECNR	EN(1)LTECNR	3179000	0.000887329
gnl|Xelaev18018279m|PAC4GC:7342347|adamtsl3.L	IN#FTIGSR	IN(1)FTIGSR	2740100	0.000764822
gnl|Xelaev18018310m|PAC4GC:7342514|rpl37a.L	IVAGGAWTYN#TTSAVTVK	IVAGGAWTYN(1)TTSAVTVK	34846000	0.00972629
gnl|Xelaev18018332m|PAC4GC:7342474|anpep.L	ETALLFDEN#VSSIGNK	ETALLFDEN(1)VSSIGNK	31795000	0.00887469
gnl|Xelaev18018337m|PAC4GC:7342274|cemip.L	GIQIYDGPINIEN#CTFR	GIQIYDGPINIEN(0.908)CTFR	4612000	0.00128731
gnl|Xelaev18018365m|PAC4GC:7342804|acan.L	YSLN#FTEAKK	YSLN(1)FTEAKK	770240000	0.214991
gnl|Xelaev18018365m|PAC4GC:7342804|acan.L	VSMPTYPLAPTDVSLEISNILSN#DSGTYR	VSMPTYPLAPTDVSLEISNILSN(1)DSGTYR	16661000	0.00465045
gnl|Xelaev18018396m|PAC4GC:7342600|igf1r.L	YAN#GTIDTEGVTEPTKPEGNVGEK	YAN(1)GTIDTEGVTEPTKPEGNVGEK	279280000	0.0779532
gnl|Xelaev18018470m|PAC4GC:7343092|glce.L	N#LTEKPPHVEVYER	N(1)LTEKPPHVEVYER	12594000	0.00351526
gnl|Xelaev18018487m|PAC4GC:7343540|casc4.L	NN#NTFLQK	NN(0.977)NTFLQK	31909000	0.00890651
gnl|Xelaev18018534m|PAC4GC:7344576|pcyox1.L	DFTAFLN#TTISETLEK	DFTAFLN(1)TTISETLEK	83997000	0.0234454
gnl|Xelaev18018585m|PAC4GC:7342876|lman2l.L	VFPYISAMVSN#GSITYDHSR	VFPYISAMVSN(1)GSITYDHSR	170050000	0.0474647
gnl|Xelaev18018586m|PAC4GC:7345017|cnnm2.L	LN#VSEEGFGAAALVR	LN(1)VSEEGFGAAALVR	27375000	0.00764097
gnl|Xelaev18018602m|PAC4GC:7344418|ggcx.L	N#ATLLQR	N(1)ATLLQR	66778000	0.0186392
gnl|Xelaev18018608m|PAC4GC:7343045|sftpb.L	QN#MTQAEVEAAVLK	QN(1)MTQAEVEAAVLK	20753000	0.00579262
gnl|Xelaev18018636m|PAC4GC:7343628|tmed4.L	FTFTSHMPGEHQICLHSN#STR	FTFTSHMPGEHQICLHSN(1)STR	539480000	0.150581
gnl|Xelaev18018646m|PAC4GC:7342894|aebp1.L	IYPQTWN#GSQCMR	IYPQTWN(1)GSQCMR	6549700	0.00182817
gnl|Xelaev18018670m|PAC4GC:7344463|Xelaev18018670m	AVLASAGMVQN#GTK	AVLASAGMVQN(1)GTK	3173300	0.000885738
gnl|Xelaev18018810m|PAC4GC:7343549|fgfr1.L	YGTLN#HTYQLDVVER	YGTLN(1)HTYQLDVVER	42424000	0.0118415
gnl|Xelaev18018944m|PAC4GC:7344358|adgre5.L	LQHTAINI#TIDPSK	LQHTAIN(1)ITIDPSK	54733000	0.0152772
gnl|Xelaev18018944m|PAC4GC:7344358|adgre5.L	EN#TSSLN#SSITFR	EN(1)TSSLN(1)SSITFR	7704100	0.00215038
gnl|Xelaev18018944m|PAC4GC:7344358|adgre5.L	NLSLSYGGN#ITAK	NLSLSYGGN(1)ITAK	7011000	0.00195693
gnl|Xelaev18018966m|PAC4GC:7342623|colgalt1.L	ISLWVATDHNLDN#TTEILR	ISLWVATDHNLDN(0.999)TTEILR	106900000	0.0298382
gnl|Xelaev18018966m|PAC4GC:7342623|colgalt1.L	GPPLN#LSSFVTIPEKVPDK	GPPLN(1)LSSFVTIPEKVPDK	95813000	0.0267435
gnl|Xelaev18018983m|PAC4GC:7342375|olfm2.L	VQN#ISQSMEVLDLR	VQN(1)ISQSMEVLDLR	9114400	0.00254403
gnl|Xelaev18018993m|PAC4GC:7344559|col11a1-like.L	VFCN#FTAGGETCLYPDKK	VFCN(1)FTAGGETCLYPDKK	14070000	0.00392725
gnl|Xelaev18019003m|PAC4GC:7343106|LOC100494743.L	VGN#ITQVVTYPITAQR	VGN(1)ITQVVTYPITAQR	217130000	0.0606058
gnl|Xelaev18019003m|PAC4GC:7343106|LOC100494743.L	CLATNQYGN#VSK	CLATNQYGN(1)VSK	10455000	0.00291822
gnl|Xelaev18019023m|PAC4GC:7343278|slc44a2.L	GVVMVGN#STTFDDGRGDKQR	GVVMVGN(1)STTFDDGRGDKQR	1329900000	0.371204
gnl|Xelaev18019023m|PAC4GC:7343278|slc44a2.L	QRN#VTDLLEGAKK	QRN(1)VTDLLEGAKK	513370000	0.143293
gnl|Xelaev18019023m|PAC4GC:7343278|slc44a2.L	DGFNN#FTK	DGFNN(0.987)FTK	143030000	0.0399228
gnl|Xelaev18019023m|PAC4GC:7343278|slc44a2.L	VFN#ETQCDFSGNTCNPETFN#TTN#VTR	VFN(1)ETQCDFSGNTCNPETFN(1)TTN(1)VTR	37714000	0.0105268
gnl|Xelaev18019027m|PAC4GC:7342086|LOC100490105.L	KTWAN#ESLVPGISIK	KTWAN(1)ESLVPGISIK	23759000	0.00663166
gnl|Xelaev18019056m|PAC4GC:7343575|Xelaev18019056m	YAEEYGN#ETWGVTK	YAEEYGN(1)ETWGVTK	40152000	0.0112073
gnl|Xelaev18019078m|PAC4GC:7342563|rtbdn.L	EDLICTLTN#ETIPR	EDLICTLTN(1)ETIPR	2828200	0.000789413
gnl|Xelaev18019093m|PAC4GC:7344772|man2b1.L	ETWKLN#QTEPVAGNYYPVNSR	ETWKLN(1)QTEPVAGNYYPVNSR	687260000	0.191829
gnl|Xelaev18019093m|PAC4GC:7344772|man2b1.L	NGPYGQSN#STVMR	NGPYGQSN(1)STVMR	116030000	0.0323865
gnl|Xelaev18019093m|PAC4GC:7344772|man2b1.L	NVNMQQIN#GSK	NVNMQQIN(1)GSK	42117000	0.0117558
gnl|Xelaev18019129m|PAC4GC:7344853|c3.L	YEDTPQQN#YTINFEVK	YEDTPQQN(1)YTINFEVK	3253100000	0.908012
gnl|Xelaev18019130m|PAC4GC:7342056|LOC100492966.L	YEDTPQQN#YTTNFEVK	YEDTPQQN(0.999)YTTNFEVK	9714800	0.00271162
gnl|Xelaev18019135m|PAC4GC:7344211|LOC101733102.L	LFISNPSLVPDN#R.T	LFISNPSLVPDN(1)R.T	335620000	0.093679
gnl|Xelaev18019147m|PAC4GC:7343112|ache.L	LLN#ITDNVDEAER	LLN(1)ITDNVDEAER	201080000	0.0561259
gnl|Xelaev18019147m|PAC4GC:7343112|ache.L	MGN#DTELLNCLR	MGN(1)DTELLNCLR	52350000	0.014612
gnl|Xelaev18019196m|PAC4GC:7343385|Xelaev18019196m	IEPATN#STGLTSR	IEPATN(1)STGLTSR	134040000	0.0374135
gnl|Xelaev18019196m|PAC4GC:7343385|Xelaev18019196m	NSN#LTYEESEFADLLK	NSN(0.951)LTYEESEFADLLK	27998000	0.00781486
gnl|Xelaev18019196m|PAC4GC:7343385|Xelaev18019196m	LIDWPSPPFSITN#FSLSTNPK	LIDWPSPPFSITN(0.994)FSLSTNPK	1714200	0.000478471
gnl|Xelaev18019198m|PAC4GC:7342044|gpc2.L	IVN#ESLSFPLGALTSGK	IVN(1)ESLSFPLGALTSGK	14222000	0.00396967
gnl|Xelaev18019390m|PAC4GC:7342109|tm4sf5.L	YPFKGQTESYLFN#K.T	YPFKGQTESYLFN(1)K.T	5884100	0.00164238
gnl|Xelaev18019507m|PAC4GC:7343565|plod3.L	LLSTSKYN#TSR	LLSTSKYN(1)TSR	1020900000	0.284956
gnl|Xelaev18019507m|PAC4GC:7343565|plod3.L	YIHEN#YSK	YIHEN(1)YSK	346140000	0.0966153
gnl|Xelaev18019569m|PAC4GC:7342575|tfr2.L	RPSFLEVTVN#GTTK	RPSFLEVTVN(1)GTTK	33947000	0.00947536
gnl|Xelaev18019580m|PAC4GC:7344615|LOC100496720.L	DVN#VTLLEKEPHNTFGASVK	DVN(1)VTLLEKEPHNTFGASVK	214040000	0.0597433
gnl|Xelaev18019580m|PAC4GC:7344615|LOC100496720.L	EMEAPLGHSFSCEN#VTLK	EMEAPLGHSFSCEN(1)VTLK	6295000	0.00175707
gnl|Xelaev18019671m|PAC4GC:7342143|slc2a4.L	IIEQSYN#ESWISR	IIEQSYN(1)ESWISR	173930000	0.0485477
gnl|Xelaev18019679m|PAC4GC:7343146|Xelaev18019679m	IINFLPGVIPSLSN#SSITIN#CTGK	IINFLPGVIPSLSN(1)SSITIN(1)CTGK	57125000	0.0159449
gnl|Xelaev18019679m|PAC4GC:7343146|Xelaev18019679m	RTYYPSN#GTVLGTMDLMYFPYYGK	RTYYPSN(1)GTVLGTMDLMYFPYYGK	27691000	0.00772917
gnl|Xelaev18019862m|PAC4GC:7350453|cecr1.S	DVDENVLDALLLN#TTR	DVDENVLDALLLN(1)TTR	151900000	0.0423986
gnl|Xelaev18019862m|PAC4GC:7350453|cecr1.S	KLEN#VTEFDNSLIR	KLEN(1)VTEFDNSLIR	121330000	0.0338659
gnl|Xelaev18019862m|PAC4GC:7350453|cecr1.S	N#LTLLTDAPETHIPSQDEIWR	N(1)LTLLTDAPETHIPSQDEIWR	16802000	0.00468981
gnl|Xelaev18019904m|PAC4GC:7350071|Xetrov90007272m.S	FQN#VTDTWR	FQN(1)VTDTWR	121670000	0.0339608
gnl|Xelaev18019905m|PAC4GC:7348672|ikbip.S	HQLEGN#VTTLQEAVAQIEHSTATISK	HQLEGN(1)VTTLQEAVAQIEHSTATISK	138640000	0.0386975
gnl|Xelaev18019905m|PAC4GC:7348672|ikbip.S	LYN#LTQIK	LYN(1)LTQIK	58359000	0.0162893
gnl|Xelaev18019973m|PAC4GC:7348637|ckap4.S	EKFTELN#NSLNDGIQEVIEVQK	EKFTELN(0.994)NSLNDGIQEVIEVQK	505390000	0.141066
gnl|Xelaev18019974m|PAC4GC:7349360|sparc.S	VCGTDN#KTYESSCHFFATK	VCGTDN(1)KTYESSCHFFATK	27930000	0.00779588
gnl|Xelaev18019982m|PAC4GC:7350346|gria1.S	RTN#YTLHVLELK	RTN(1)YTLHVLELK	3991500	0.00111412
gnl|Xelaev18020056m|PAC4GC:7349218|pdgfrb.S	LLDN#KTSDLEFR	LLDN(1)KTSDLEFR	31670000	0.0088398
gnl|Xelaev18020058m|PAC4GC:7348556|csf1r.S	QVTLTCSGN#QTVK	QVTLTCSGN(1)QTVK	1475000	0.000411705
gnl|Xelaev18020140m|PAC4GC:7349113|adam9.S	FDLLGRN#ESAVR	FDLLGRN(1)ESAVR	9004300	0.0025133
gnl|Xelaev18020156m|PAC4GC:7349505|fgfr1.S	YGAIN#HTYQLDVVER	YGAIN(1)HTYQLDVVER	8985500	0.00250805
gnl|Xelaev18020192m|PAC4GC:7350122|bmp1.S	IILN#FTSLDLYR	IILN(1)FTSLDLYR	126960000	0.0354373
gnl|Xelaev18020192m|PAC4GC:7350122|bmp1.S	HTIHTVSGAATN#ISRPEK	HTIHTVSGAATN(1)ISRPEK	54489000	0.0152091
gnl|Xelaev18020201m|PAC4GC:7348958|gfra2.S	NAILAFGN#GTDVVHR	NAILAFGN(1)GTDVVHR	84033000	0.0234555
gnl|Xelaev18020230m|PAC4GC:7350226|Xelaev18020230m	AVLAPAGMVQN#GTK	AVLAPAGMVQN(1)GTK	312180000	0.0871363
gnl|Xelaev18020247m|PAC4GC:7349117|LOC100497310-like.S	GIPDPLN#ISVIK	GIPDPLN(1)ISVIK	28546000	0.00796782
gnl|Xelaev18020255m|PAC4GC:7349956|aebp1.S	EGEPIAN#ATISIGEINHDIK	EGEPIAN(1)ATISIGEINHDIK	23889000	0.00666795
gnl|Xelaev18020255m|PAC4GC:7349956|aebp1.S	IYPLTWN#GSLCMR	IYPLTWN(1)GSLCMR	13274000	0.00370507
gnl|Xelaev18020262m|PAC4GC:7348722|npc1l1.S	ELAAN#ITESLR	ELAAN(1)ITESLR	21335000	0.00595507
gnl|Xelaev18020264m|PAC4GC:7350238|tmed4.S	FTFTSHTPGEHQICLHSN#SSR	FTFTSHTPGEHQICLHSN(1)SSR	60245000	0.0168157
gnl|Xelaev18020304m|PAC4GC:7350234|sema4c.S	RGTN#FTTIAVHR	RGTN(1)FTTIAVHR	18898000	0.00527485
gnl|Xelaev18020307m|PAC4GC:7349666|lman2l.S	VFPYISAMVSN#GSVTYDHSR	VFPYISAMVSN(1)GSVTYDHSR	16561000	0.00462254
gnl|Xelaev18020403m|PAC4GC:7348844|casc4.S	LQNN#VSLQMADISR	LQNN(1)VSLQMADISR	204970000	0.0572117
gnl|Xelaev18020440m|PAC4GC:7350365|igdcc3.S	LLAFNQHGDGN#STVR	LLAFNQHGDGN(1)STVR	342530000	0.0956077
gnl|Xelaev18020440m|PAC4GC:7350365|igdcc3.S	VLN#STAIQAAWEPSIK	VLN(1)STAIQAAWEPSIK	117380000	0.0327634
gnl|Xelaev18020442m|PAC4GC:7349787|cilp.S	YSTIIITIPDTN#GTASSIK	YSTIIITIPDTN(1)GTASSIK	21018000	0.00586659
gnl|Xelaev18020465m|PAC4GC:7348820|igf1r.S	YAN#GTIDTEGGTEPTKPEGSVGEK	YAN(1)GTIDTEGGTEPTKPEGSVGEK	62784000	0.0175244
gnl|Xelaev18020503m|PAC4GC:7349384|acan.S	VSMPTYPLAPTDVSLEISTIMSN#DSGTYR	VSMPTYPLAPTDVSLEISTIMSN(1)DSGTYR	17311000	0.00483188
gnl|Xelaev18020504m|PAC4GC:7349037|hapln3.S	GGN#ATLPCTFHYEPK	GGN(1)ATLPCTFHYEPK	19179000	0.00535328
gnl|Xelaev18020602m|PAC4GC:7348884|sppl2a.S	AVVVLFGN#CSILAK	AVVVLFGN(1)CSILAK	30248000	0.00844289
gnl|Xelaev18020602m|PAC4GC:7348884|sppl2a.S	EGLPFLADN#R.S	EGLPFLADN(1)R.S	23021000	0.00642567
gnl|Xelaev18020677m|PAC4GC:7349888|adam10.S	N#ISQVLDK	N(1)ISQVLDK	42137000	0.0117614
gnl|Xelaev18020744m|PAC4GC:7349913|ppib.S	DTN#GSQFFITTVK	DTN(1)GSQFFITTVK	48623000	0.0135718
gnl|Xelaev18020769m|PAC4GC:7350316|lingo1.S	LIPLGVFTGLSN#LTQLDISENK	LIPLGVFTGLSN(1)LTQLDISENK	6870200	0.00191762
gnl|Xelaev18020782m|PAC4GC:7349890|cd276.S	GN#MSVLLQQVR	GN(1)MSVLLQQVR	159440000	0.0445032
gnl|Xelaev18020783m|PAC4GC:7348797|nptn.S	VTDGGLAELNN#GSGR	VTDGGLAELNN(1)GSGR	1407800000	0.392948
gnl|Xelaev18020783m|PAC4GC:7348797|nptn.S	NNSPPAN#ATIEVK	NNSPPAN(1)ATIEVK	747850000	0.208741
gnl|Xelaev18020783m|PAC4GC:7348797|nptn.S	KETSATPIFLHCN#ITVTSSQGGLER	KETSATPIFLHCN(1)ITVTSSQGGLER	256980000	0.0717288
gnl|Xelaev18020783m|PAC4GC:7348797|nptn.S	IINLDITNDPGTYLCN#ASNTIGSDN#TTTILR	IINLDITNDPGTYLCN(0.994)ASNTIGSDN(1)TTTILR	79331000	0.022143
gnl|Xelaev18020783m|PAC4GC:7348797|nptn.S	MFITSKDN#YTELK	MFITSKDN(1)YTELK	29939000	0.00835664
gnl|Xelaev18020787m|PAC4GC:7349349|neo1.S	VAILSN#GSLVIHNANESDAGLYR	VAILSN(0.997)GSLVIHNANESDAGLYR	7341400	0.00204915
gnl|Xelaev18020855m|PAC4GC:7349715|calu.S	N#VTYGTYLDDPDPDNSFNYK	N(1)VTYGTYLDDPDPDNSFNYK	238740000	0.0666376
gnl|Xelaev18020875m|PAC4GC:7349893|smo.S	FN#SSGQCEAPLVR	FN(1)SSGQCEAPLVR	18674000	0.00521233
gnl|Xelaev18020898m|PAC4GC:7349442|podxl.S	LAHNDLHNMLKN#LTDKDGK	LAHNDLHNMLKN(0.948)LTDKDGK	14707000	0.00410505
gnl|Xelaev18020914m|PAC4GC:7349333|itih2.S	N#ITQTILQMSIDHHFVTPFTSLLIESENGNER	N(1)ITQTILQMSIDHHFVTPFTSLLIESENGNER	19981000	0.00557714
gnl|Xelaev18020952m|PAC4GC:7348751|cacna2d1.S	FAFDQLLNHN#VSR	FAFDQLLNHN(0.937)VSR	28217000	0.00787599
gnl|Xelaev18020952m|PAC4GC:7348751|cacna2d1.S	IDVNSWMEN#FTR	IDVNSWMEN(1)FTR	15586000	0.0043504
gnl|Xelaev18020981m|PAC4GC:7349799|sypl1.S	LNVQTFEGIPEHFCN#QTWK	LNVQTFEGIPEHFCN(1)QTWK	228210000	0.0636985
gnl|Xelaev18021004m|PAC4GC:7349752|lamb1.S	GLN#YTIR	GLN(1)YTIR	573420000	0.160054
gnl|Xelaev18021004m|PAC4GC:7349752|lamb1.S	IN#DTEKLDALQTDAESFGK	IN(1)DTEKLDALQTDAESFGK	209610000	0.0585068
gnl|Xelaev18021004m|PAC4GC:7349752|lamb1.S	VN#ASVSNPDSVIEHSAATR	VN(1)ASVSNPDSVIEHSAATR	107670000	0.0300531
gnl|Xelaev18021004m|PAC4GC:7349752|lamb1.S	GTNDLLTSIESETAVSEETLNN#ATKR	GTNDLLTSIESETAVSEETLNN(0.905)ATKR	72325000	0.0201875
gnl|Xelaev18021004m|PAC4GC:7349752|lamb1.S	QSAQDVLNKAN#ATK	QSAQDVLNKAN(0.989)ATK	70111000	0.0195695
gnl|Xelaev18021033m|PAC4GC:7349159|plxnb2.S	AFIRN#DSYEYR	AFIRN(1)DSYEYR	85625000	0.0238998
gnl|Xelaev18021033m|PAC4GC:7349159|plxnb2.S	GKDNVN#ITISLR	GKDNVN(1)ITISLR	54254000	0.0151435
gnl|Xelaev18021033m|PAC4GC:7349159|plxnb2.S	MDGLELPLQANELSFTYILDPVFEN#FTDGIKK	MDGLELPLQANELSFTYILDPVFEN(1)FTDGIKK	7665700	0.00213967
gnl|Xelaev18021033m|PAC4GC:7349159|plxnb2.S	GYN#LSAAMTIEEAEAFVGEGICK	GYN(1)LSAAMTIEEAEAFVGEGICK	7064100	0.00197175
gnl|Xelaev18021108m|PAC4GC:7349936|nrcam.S	DSSGN#YTCIATNR	DSSGN(1)YTCIATNR	9725300	0.00271455
gnl|Xelaev18021109m|PAC4GC:7349428|cntn1.S	AYVYVEGVPEWVEHIN#DTER	AYVYVEGVPEWVEHIN(1)DTER	82337000	0.0229821
gnl|Xelaev18021109m|PAC4GC:7349428|cntn1.S	VEQTDRGN#YSCFVSSPSVTK	VEQTDRGN(1)YSCFVSSPSVTK	61751000	0.0172361
gnl|Xelaev18021109m|PAC4GC:7349428|cntn1.S	ALKDQN#VTLECFALGNPVPVITWR	ALKDQN(1)VTLECFALGNPVPVITWR	24192000	0.00675252
gnl|Xelaev18021109m|PAC4GC:7349428|cntn1.S	VSIWDDGSLEILN#ITK	VSIWDDGSLEILN(1)ITK	14379000	0.0040135
gnl|Xelaev18021109m|PAC4GC:7349428|cntn1.S	YTCTAQTIVDN#SSASADLVVR	YTCTAQTIVDN(1)SSASADLVVR	10796000	0.0030134
gnl|Xelaev18021172m|PAC4GC:7348655|LOC100493461.S	ISN#MSIVGQDFGESILEPGR	ISN(1)MSIVGQDFGESILEPGR	3527300	0.000984547
gnl|Xelaev18021194m|PAC4GC:7350242|gns.S	YYN#YTLSENGRPK	YYN(1)YTLSEN(1)GRPK	31728000	0.00885599
gnl|Xelaev18021199m|PAC4GC:7349032|lemd3.S	CVSDPGSILN#ITSVK	CVSDPGSILN(1)ITSVK	18311000	0.005111
gnl|Xelaev18021241m|PAC4GC:7349346|dcn.S	IADTN#ITNIPK	IADTN(0.999)ITNIPK	570290000	0.159181
gnl|Xelaev18021241m|PAC4GC:7349346|dcn.S	LGLSYNNIITFEN#GTITGVPHLR	LGLSYNNIITFEN(1)GTITGVPHLR	112740000	0.0314682
gnl|Xelaev18021242m|PAC4GC:7350095|lum.S	ITPNILEGLEN#LTHIHLQHNALK	ITPNILEGLEN(1)LTHIHLQHNALK	460420000	0.128513
gnl|Xelaev18021275m|PAC4GC:7349121|tmpo.S	GAAGRPLN#ATDFK	GAAGRPLN(1)ATDFK	19689000	0.00549564
gnl|Xelaev18021349m|PAC4GC:7348939|tmed9.S	FTFTSHTPGEHQICLHSN#STK	FTFTSHTPGEHQICLHSN(1)STK	799860000	0.223259
gnl|Xelaev18021484m|PAC4GC:7349608|p4ha2.S	GFIAN#LTFQK	GFIAN(1)LTFQK	134320000	0.0374917
gnl|Xelaev18021499m|PAC4GC:7349916|tenm2-like.2.S	DSTHIIPGENPFN#SSLVSLIR	DSTHIIPGENPFN(0.998)SSLVSLIR	3239100	0.000904104
gnl|Xelaev18021541m|PAC4GC:7349589|pcdh1.S	FMLNGYN#FSVMENMPR	FMLNGYN(1)FSVMENMPR	8242500	0.00230066
gnl|Xelaev18021626m|PAC4GC:7349398|s1pr2.S	MN#STYQEYLNPR	MN(1)STYQEYLNPR	6850800	0.00191221
gnl|Xelaev18021627m|PAC4GC:7349357|LOC100494743.S	IALN#VTTTK	IALN(1)VTTTK	106470000	0.0297181
gnl|Xelaev18021627m|PAC4GC:7349357|LOC100494743.S	LN#ETVAVSCK	LN(1)ETVAVSCK	45924000	0.0128184
gnl|Xelaev18021627m|PAC4GC:7349357|LOC100494743.S	ASN#ISCTVLSR	ASN(1)ISCTVLSR	40426000	0.0112838
gnl|Xelaev18021627m|PAC4GC:7349357|LOC100494743.S	CLATNDYGTVN#K.S	CLATNDYGTVN(1)K.S	36040000	0.0100596
gnl|Xelaev18021627m|PAC4GC:7349357|LOC100494743.S	N#ITVHYSPLFQDNQCPDQLVLTEGR	N(0.997)ITVHYSPLFQDNQCPDQLVLTEGR	12713000	0.00354848
gnl|Xelaev18021630m|PAC4GC:7349158|icam5.S	GLPYPTYTWETPAPDVTFSPDN#R.T	GLPYPTYTWETPAPDVTFSPDN(1)R.T	49198000	0.0137322
gnl|Xelaev18021630m|PAC4GC:7349158|icam5.S	IIDDESTEITCTLPTN#ETLDVK	IIDDESTEITCTLPTN(1)ETLDVK	23123000	0.00645414
gnl|Xelaev18021734m|PAC4GC:7363392|tmem9b.L	GNIFNKN#VTQK	GNIFNKN(0.97)VTQK	43418000	0.0121189
gnl|Xelaev18021807m|PAC4GC:7362868|ttc17.L	RN#ESLNQLLLELESR	RN(1)ESLNQLLLELESR	16596000	0.00463231
gnl|Xelaev18021807m|PAC4GC:7362868|ttc17.L	LN#LSAPLLPK	LN(1)LSAPLLPK	10732000	0.00299554
gnl|Xelaev18021807m|PAC4GC:7362868|ttc17.L	N#LTGALQVFR	N(1)LTGALQVFR	2665300	0.000743944
gnl|Xelaev18021823m|PAC4GC:7363672|cd82.L	LIVTYDYEDGKN#TSSETTWDYIQR	LIVTYDYEDGKN(1)TSSETTWDYIQR	10230000	0.00285542
gnl|Xelaev18021857m|PAC4GC:7361567|loc100494782.L	KPTCWN#DTLDATEFK	KPTCWN(1)DTLDATEFK	6414300	0.00179037
gnl|Xelaev18021869m|PAC4GC:7362996|f2.L	WVLTAAHCIFYPPWDKN#YTTDDILVR	WVLTAAHCIFYPPWDKN(1)YTTDDILVR	8206500	0.00229062
gnl|Xelaev18022004m|PAC4GC:7362392|ano9.L	DFEN#LTQVLQSPR	DFEN(1)LTQVLQSPR	11127000	0.00310579
gnl|Xelaev18022007m|PAC4GC:7363871|cd81.L	LSFLN#LSEVCPK	LSFLN(1)LSEVCPK	16726000	0.0046686
gnl|Xelaev18022065m|PAC4GC:7362406|slc5a12.L	IWETAMN#GSR	IWETAMN(1)GSR	16032000	0.00447489
gnl|Xelaev18022066m|PAC4GC:7361478|unnamed.L	VYIDN#FSCIPEDPTCVK	VYIDN(1)FSCIPEDPTCVK	3678100	0.00102664
gnl|Xelaev18022083m|PAC4GC:7362535|LOC100493937.L	YVCVMTLPDN#STK	YVCVMTLPDN(1)STK	94954000	0.0265038
gnl|Xelaev18022198m|PAC4GC:7363067|lrrn4cl.L	VLYGTTDSQLESGPILN#NTYR	VLYGTTDSQLESGPILN(0.922)NTYR	42774000	0.0119392
gnl|Xelaev18022243m|PAC4GC:7362332|slc3a2.L	DLPGQPAQSSRPNMQWEEVSVSNNSPQIASDVNAN#ITFK	DLPGQPAQSSRPNMQWEEVSVSNNSPQIASDVNAN(0.946)ITFK	170150000	0.0474926
gnl|Xelaev18022243m|PAC4GC:7362332|slc3a2.L	VLLLSTSSAQNNLTGGFN#ETIDGTLFYR	VLLLSTSSAQNNLTGGFN(0.932)ETIDGTLFYR	7368300	0.00205666
gnl|Xelaev18022257m|PAC4GC:7362979|ganab.L	NQASLLLEVYGLDGN#MTR	NQASLLLEVYGLDGN(1)MTR	465910000	0.130046
gnl|Xelaev18022257m|PAC4GC:7362979|ganab.L	EFN#YSQGK	EFN(1)YSQGK	397000000	0.110811
gnl|Xelaev18022268m|PAC4GC:7362779|lrp5.L	IEVANLN#GTYR	IEVANLN(1)GTYR	11639000	0.0032487
gnl|Xelaev18022268m|PAC4GC:7362779|lrp5.L	LVLVN#SSLGWPNGLALDLQDGK	LVLVN(1)SSLGWPNGLALDLQDGK	3410500	0.000951946
gnl|Xelaev18022292m|PAC4GC:7363400|slc29a2.L	ISELDYSN#TSLANNTSDK	ISELDYSN(1)TSLANNTSDK	235320000	0.065683
gnl|Xelaev18022294m|PAC4GC:7362383|b4gat1.L	VVNYAGN#ASYPNNLLR	VVNYAGN(1)ASYPNNLLR	56640000	0.0158095
gnl|Xelaev18022381m|PAC4GC:7361501|pla2g15.L	VFVITPNKN#YTIK	VFVITPNKN(0.997)YTIK	141450000	0.0394818
gnl|Xelaev18022381m|PAC4GC:7361501|pla2g15.L	VSLVELPGNEHIAMLSN#ISTISYVK	VSLVELPGNEHIAMLSN(0.999)ISTISYVK	13129000	0.00366459
gnl|Xelaev18022524m|PAC4GC:7363324|cetp.L	KPSDIFN#SSLYTPSLLSENR	KPSDIFN(1)SSLYTPSLLSENR	129770000	0.0362217
gnl|Xelaev18022524m|PAC4GC:7363324|cetp.L	LILN#LSDSIVHIK	LILN(1)LSDSIVHIK	16450000	0.00459156
gnl|Xelaev18022555m|PAC4GC:7363105|pkd1l2.L	DTSTLVLN#STFLK	DTSTLVLN(1)STFLK	5486000	0.00153126
gnl|Xelaev18022586m|PAC4GC:7363822|cdh11.L	GLDREESSWHN#ISIIANEIHNR	GLDREESSWHN(1)ISIIANEIHNR	83034000	0.0231766
gnl|Xelaev18022588m|PAC4GC:7361511|cdh5.L	LQLN#SSSLHENAK	LQLN(1)SSSLHENAK	202150000	0.0564245
gnl|Xelaev18022638m|PAC4GC:7363959|cdh3.L	VNEGGFFN#ITTDPESNQGILTTAK	VNEGGFFN(0.972)ITTDPESNQGILTTAK	72947000	0.0203611
gnl|Xelaev18022638m|PAC4GC:7363959|cdh3.L	HSTN#ISVVNKR	HSTN(1)ISVVNKR	5324300	0.00148613
gnl|Xelaev18022658m|PAC4GC:7362084|cdh13.L	ITQLN#NTHAQVR	ITQLN(0.999)NTHAQVR	978700000	0.273177
gnl|Xelaev18022658m|PAC4GC:7362084|cdh13.L	ANYNLPVTVTDSGKPPLTN#STELK	ANYNLPVTVTDSGKPPLTN(1)STELK	347960000	0.0971233
gnl|Xelaev18022658m|PAC4GC:7362084|cdh13.L	ENIQIGSQLFTVN#ATDPDTLQHQSIR	ENIQIGSQLFTVN(1)ATDPDTLQHQSIR	281910000	0.0786873
gnl|Xelaev18022658m|PAC4GC:7362084|cdh13.L	EGVTGVMVN#LTVEDKDDPATGAWK	EGVTGVMVN(1)LTVEDKDDPATGAWK	63908000	0.0178381
gnl|Xelaev18022658m|PAC4GC:7362084|cdh13.L	YSILKDEAGWLYINPLN#GTIN#TTSPLDR	YSILKDEAGWLYINPLN(0.945)GTIN(0.998)TTSPLDR	26124000	0.00729179
gnl|Xelaev18022714m|PAC4GC:7363291|ces1.L	DLIAN#ISECDLPLILNCLK	DLIAN(1)ISECDLPLILNCLK	1826600	0.000509844
gnl|Xelaev18022718m|PAC4GC:7363874|ces2.L	AISESGVAILPGLMAN#KTEK	AISESGVAILPGLMAN(1)KTEK	58705000	0.0163859
gnl|Xelaev18022817m|PAC4GC:7362274|st3gal2.1.L	NLPAN#VSFVLVPFK	NLPAN(1)VSFVLVPFK	9077600	0.00253376
gnl|Xelaev18022851m|PAC4GC:7361815|zpd.L	IRYPIISSGYPN#DTTVAMIQTLDNSLTR	IRYPIISSGYPN(1)DTTVAMIQTLDNSLTR	6001600	0.00167518
gnl|Xelaev18022893m|PAC4GC:7361669|ctbs.L	GDVPLQDIVDPNN#R.T	GDVPLQDIVDPNN(1)R.T	1616000000	0.451061
gnl|Xelaev18022893m|PAC4GC:7361669|ctbs.L	QVN#SSLTGR	QVN(1)SSLTGR	970050000	0.270762
gnl|Xelaev18022993m|PAC4GC:7363715|ror1.L	CYN#NTGVDYR	CYN(1)NTGVDYR	5983500	0.00167013
gnl|Xelaev18023004m|PAC4GC:7362956|angptl3.L	LQANNEELKN#ISR	LQANNEELKN(1)ISR	25682000	0.00716841
gnl|Xelaev18023008m|PAC4GC:7362158|tm2d1.L	LVHLSINN#ETYR	LVHLSIN(1)N(1)ETYR	157210000	0.0438808
gnl|Xelaev18023132m|PAC4GC:7362042|efcab14.L	LWSN#ITETNK	LWSN(0.999)ITETNK	10416000	0.00290734
gnl|Xelaev18023132m|PAC4GC:7362042|efcab14.L	LYSVDTIISN#LTQR	LYSVDTIISN(1)LTQR	7334800	0.0020473
gnl|Xelaev18023203m|PAC4GC:7362774|tmem59.L	LFSICQFVDDGEDLN#R.T	LFSICQFVDDGEDLN(1)R.T	1911300	0.000533486
gnl|Xelaev18023232m|PAC4GC:7363227|serpinc1.L	EIINNWVSN#KTEKR	EIINNWVSN(1)KTEKR	261160000	0.0728955
gnl|Xelaev18023238m|PAC4GC:7361853|tnr.L	NNEGGLTVQLPSSVTSFN#QTGLKPGEEYTVSIISLK	NNEGGLTVQLPSSVTSFN(1)QTGLKPGEEYTVSIISLK	8797500	0.00245558
gnl|Xelaev18023248m|PAC4GC:7361827|Xelaev18023248m	MQILVN#LTHDRLPK	MQILVN(1)LTHDRLPK	13430000	0.00374861
gnl|Xelaev18023263m|PAC4GC:7363783|lamc1.L	MLQN#LTAIK	MLQN(1)LTAIK	605630000	0.169045
gnl|Xelaev18023263m|PAC4GC:7363783|lamc1.L	ALQIYAN#LTSLPNIDTTGLQNEADKIQK	ALQIYAN(1)LTSLPNIDTTGLQNEADKIQK	361010000	0.100766
gnl|Xelaev18023263m|PAC4GC:7363783|lamc1.L	VNDN#KTAAETALR	VNDN(1)KTAAETALR	214700000	0.0599275
gnl|Xelaev18023263m|PAC4GC:7363783|lamc1.L	EAN#DTANEALR	EAN(0.999)DTANEALR	82332000	0.0229807
gnl|Xelaev18023263m|PAC4GC:7363783|lamc1.L	MAEMASN#ATQEAEKYANK	MAEMASN(1)ATQEAEKYANK	59531000	0.0166164
gnl|Xelaev18023263m|PAC4GC:7363783|lamc1.L	VAIANVSITPPETGGDPNN#MTLLAEEAR	VAIAN(1)VSITPPETGGDPNN(1)MTLLAEEAR	25461000	0.00710673
gnl|Xelaev18023263m|PAC4GC:7363783|lamc1.L	LAEIN#TTLSFQLER	LAEIN(1)TTLSFQLER	7140300	0.00199302
gnl|Xelaev18023280m|PAC4GC:7363397|qsox1.L	KGNLPIIGMSSN#NTTQQDNR	KGNLPIIGMSSN(0.9)NTTQQDNR	220920000	0.0616637
gnl|Xelaev18023296m|PAC4GC:7362911|cnn3.L	AVSQPADN#STISLQMGTNK	AVSQPADN(1)STISLQMGTNK	105330000	0.0293999
gnl|Xelaev18023314m|PAC4GC:7362822|abca4.L	VFLGVN#STKK	VFLGVN(1)STKK	40538000	0.0113151
gnl|Xelaev18023366m|PAC4GC:7362518|loc100158554.L	DTVIEDQSLGN#FTR	DTVIEDQSLGN(1)FTR	652280000	0.182066
gnl|Xelaev18023366m|PAC4GC:7362518|loc100158554.L	ILIPNSWTSN#SSYGRPK	ILIPNSWTSN(1)SSYGRPK	144550000	0.0403471
gnl|Xelaev18023366m|PAC4GC:7362518|loc100158554.L	ALYLPGYIVN#GTVFR	ALYLPGYIVN(1)GTVFR	129990000	0.0362831
gnl|Xelaev18023366m|PAC4GC:7362518|loc100158554.L	DLLENFEN#ATTVN#VTHLAPQLAGTR	DLLENFEN(0.999)ATTVN(1)VTHLAPQLAGTR	74178000	0.0207047
gnl|Xelaev18023392m|PAC4GC:7363749|myoc.L	MIPETHLAN#HSSETTR	MIPETHLAN(1)HSSETTR	62374000	0.01741
gnl|Xelaev18023436m|PAC4GC:7363663|col5a3-like.L	VYCN#FTAGGETCIYPDKK	VYCN(1)FTAGGETCIYPDKK	37446000	0.010452
gnl|Xelaev18023537m|PAC4GC:7361507|foxred2.L	YGVN#ISLVR	YGVN(1)ISLVR	16051000	0.00448019
gnl|Xelaev18023562m|PAC4GC:7362610|chadl.L	LN#LTGNAIR	LN(1)LTGNAIR	149220000	0.0416506
gnl|Xelaev18023562m|PAC4GC:7362610|chadl.L	N#LTEVPASIPQYTQK	N(1)LTEVPASIPQYTQK	11287000	0.00315045
gnl|Xelaev18023628m|PAC4GC:7363404|colgalt2.L	ALN#TSQLK	ALN(1)TSQLK	426930000	0.119166
gnl|Xelaev18023763m|PAC4GC:7362259|ogn.L	ILHLQQNN#ITSITDDTFCK	ILHLQQNN(1)ITSITDDTFCK	292120000	0.0815371
gnl|Xelaev18023763m|PAC4GC:7362259|ogn.L	ILHLQQNNITSITDDTFCKSN#DTR	ILHLQQNNITSITDDTFCKSN(1)DTR	51683000	0.0144259
gnl|Xelaev18023798m|PAC4GC:7361700|dag1.L	MWVMLN#STSQVMYGMPDYIHIGDHEYYLK	MWVMLN(1)STSQVMYGMPDYIHIGDHEYYLK	7291700	0.00203527
gnl|Xelaev18023809m|PAC4GC:7362339|mst1.L	LLPWTQN#SSNVLLQR	LLPWTQN(0.999)SSNVLLQR	31295000	0.00873513
gnl|Xelaev18023809m|PAC4GC:7362339|mst1.L	GKAN#TTTSGIPCQR	GKAN(1)TTTSGIPCQR	8952600	0.00249887
gnl|Xelaev18023839m|PAC4GC:7361506|hyal2.L	LGMYPYYDEHGGPVAGGLPQN#ASLR	LGMYPYYDEHGGPVAGGLPQN(1)ASLR	257290000	0.0718153
gnl|Xelaev18023853m|PAC4GC:7363542|cacna2d2.L	ESGYRPSDLEN#NTVGILVSTAVELDVSGKK	ESGYRPSDLEN(0.928)NTVGILVSTAVELDVSGKK	1893000	0.000528378
gnl|Xelaev18023888m|PAC4GC:7363886|fbln2.L	YDPSHIFN#ISR	YDPSHIFN(1)ISR	42767000	0.0119372
gnl|Xelaev18024009m|PAC4GC:7361471|slc26a6.L	LPGN#ESVIDIAAR	LPGN(1)ESVIDIAAR	48418000	0.0135145
gnl|Xelaev18024044m|PAC4GC:7363244|LOC100170549.L	IGN#LSEKAEDLLDKTESNR	IGN(1)LSEKAEDLLDKTESNR	14961000	0.00417595
gnl|Xelaev18024044m|PAC4GC:7363244|LOC100170549.L	EGEVAPGN#HSQIR	EGEVAPGN(1)HSQIR	6493300	0.00181242
gnl|Xelaev18024044m|PAC4GC:7363244|LOC100170549.L	AESVSAN#ISDALALLQEAEAK	AESVSAN(1)ISDALALLQEAEAK	6344400	0.00177086
gnl|Xelaev18024044m|PAC4GC:7363244|LOC100170549.L	MVN#GSVYGPGSPVFQSQQTR	MVN(1)GSVYGPGSPVFQSQQTR	3555300	0.000992363
gnl|Xelaev18024044m|PAC4GC:7363244|LOC100170549.L	QVLN#ISLPASPGDITALVNEIK	QVLN(1)ISLPASPGDITALVNEIK	1368000	0.000381839
gnl|Xelaev18024115m|PAC4GC:7362477|eogt.L	LN#ITQHPATEAK	LN(1)ITQHPATEAK	49234000	0.0137423
gnl|Xelaev18024208m|PAC4GC:7365100|slc3a2.S	N#FSSLGATIK	N(1)FSSLGATIK	819370000	0.228704
gnl|Xelaev18024247m|PAC4GC:7364470|fut6.S	LIN#LTMSYR	LIN(1)LTMSYR	123190000	0.0343851
gnl|Xelaev18024247m|PAC4GC:7364470|fut6.S	HDGKEN#FTMPAK	HDGKEN(1)FTMPAK	5752700	0.00160571
gnl|Xelaev18024266m|PAC4GC:7364805|cdhr5.S	QSAYN#FTVPEDAK	QSAYN(1)FTVPEDAK	5370300	0.00149897
gnl|Xelaev18024298m|PAC4GC:7365400|LOC100498375.S	LMNPGDVLPSMSDN#CTVYK	LMNPGDVLPSMSDN(1)CTVYK	26145000	0.00729765
gnl|Xelaev18024298m|PAC4GC:7365400|LOC100498375.S	VYN#ACGPAIPTTCQTTPTDATALK	VYN(1)ACGPAIPTTCQTTPTDATALK	19136000	0.00534128
gnl|Xelaev18024298m|PAC4GC:7365400|LOC100498375.S	DSN#TTIPGVTPYSDITNTATDR	DSN(1)TTIPGVTPYSDITNTATDR	8515100	0.00237675
gnl|Xelaev18024306m|PAC4GC:7364382|LOC100495470.S	ETEN#VTITLK	ETEN(1)VTITLK	705100000	0.196809
gnl|Xelaev18024306m|PAC4GC:7364382|LOC100495470.S	YIN#STCGLCGNMNQVK	YIN(1)STCGLCGNMNQVK	43020000	0.0120078
gnl|Xelaev18024306m|PAC4GC:7364382|LOC100495470.S	LDGPTEQCEHITPSPPKN#CSDLR	LDGPTEQCEHITPSPPKN(1)CSDLR	11877000	0.00331513
gnl|Xelaev18024367m|PAC4GC:7365000|LOC613063.S	YYTGDFHYLN#VTRK	YYTGDFHYLN(1)VTRK	1035200000	0.288947
gnl|Xelaev18024367m|PAC4GC:7365000|LOC613063.S	N#GTEFAIQYGTGSLSGYLSK	N(1)GTEFAIQYGTGSLSGYLSK	34133000	0.00952727
gnl|Xelaev18024368m|PAC4GC:7365343|ctsd.S	NPDTQPGGELLLGGTDPTYYTGDFSYMN#VTR	NPDTQPGGELLLGGTDPTYYTGDFSYMN(1)VTR	686480000	0.191612
gnl|Xelaev18024377m|PAC4GC:7364536|Xelaev18024377m	NQGN#DSCLDYEIK	NQGN(1)DSCLDYEIK	242080000	0.0675699
gnl|Xelaev18024377m|PAC4GC:7364536|Xelaev18024377m	ILCCTGQLAN#ATESTK	ILCCTGQLAN(1)ATESTK	26904000	0.0075095
gnl|Xelaev18024420m|PAC4GC:7365447|spon1.S	LTFYGN#WSEK	LTFYGN(1)WSEK	103330000	0.0288417
gnl|Xelaev18024443m|PAC4GC:7365921|acp2.S	GFLN#ESYNR	GFLN(1)ESYNR	941830000	0.262886
gnl|Xelaev18024443m|PAC4GC:7365921|acp2.S	QSAEYIN#MTTTYK	QSAEYIN(1)MTTTYK	464510000	0.129655
gnl|Xelaev18024443m|PAC4GC:7365921|acp2.S	AFLQMVAN#K.T	AFLQMVAN(1)K.T	110630000	0.0308793
gnl|Xelaev18024478m|PAC4GC:7365186|mdk.S	YKFENWGECN#ATTGQK	YKFENWGECN(1)ATTGQK	25534000	0.0071271
gnl|Xelaev18024504m|PAC4GC:7365272|cd44.S	FDAYCFN#ASETEDK	FDAYCFN(1)ASETEDK	30891000	0.00862236
gnl|Xelaev18024836m|PAC4GC:7364713|cdh11.S	GLDREESPWHN#ISVIATEVHNR	GLDREESPWHN(1)ISVIATEVHNR	158520000	0.0442464
gnl|Xelaev18024838m|PAC4GC:7364984|cdh5.S	AFN#GSVNEMSDR	AFN(1)GSVNEMSDR	76722000	0.0214148
gnl|Xelaev18024838m|PAC4GC:7364984|cdh5.S	ETADWHN#FTVVAEEVDPSNPPIKK	ETADWHN(1)FTVVAEEVDPSNPPIKK	13754000	0.00383905
gnl|Xelaev18024865m|PAC4GC:7364993|cdh15.S	VN#VTDKDLPGSINWR	VN(1)VTDKDLPGSINWR	41985000	0.0117189
gnl|Xelaev18024918m|PAC4GC:7364808|cdh1.S	FVLN#NTYK	FVLN(0.988)NTYK	1990000000	0.555453
gnl|Xelaev18024918m|PAC4GC:7364808|cdh1.S	EDGWLN#VTRPLDR	EDGWLN(1)VTRPLDR	261490000	0.0729876
gnl|Xelaev18024918m|PAC4GC:7364808|cdh1.S	KELEIGQYDVMITLLDSFGLSN#VTK	KELEIGQYDVMITLLDSFGLSN(1)VTK	16128000	0.00450168
gnl|Xelaev18024938m|PAC4GC:7365258|cdh13.S	ENIQIGSQLFTVN#ATDPDTLQHQSIR	ENIQIGSQLFTVN(1)ATDPDTLQHQSIR	245160000	0.0684296
gnl|Xelaev18024938m|PAC4GC:7365258|cdh13.S	ITQLN#HTHAQVSLLHNLK	ITQLN(1)HTHAQVSLLHNLK	22784000	0.00635952
gnl|Xelaev18025009m|PAC4GC:7365363|glg1.S	VN#ITEYQCHQYITK	VN(1)ITEYQCHQYITK	306300000	0.0854951
gnl|Xelaev18025009m|PAC4GC:7365363|glg1.S	EIVGN#LTELESEDIQIEALLMR	EIVGN(1)LTELESEDIQIEALLMR	50738000	0.0141621
gnl|Xelaev18025026m|PAC4GC:7365082|itfg1.S	DTSGGNQQAVLLENVPCKN#STCTR	DTSGGNQQAVLLENVPCKN(0.975)STCTR	15674000	0.00437496
gnl|Xelaev18025026m|PAC4GC:7365082|itfg1.S	N#VTADVFGSESYGK	N(1)VTADVFGSESYGK	15633000	0.00436352
gnl|Xelaev18025162m|PAC4GC:7364346|tie1.S	QEN#ITSMNVLSR	QEN(1)ITSMNVLSR	10633000	0.00296791
gnl|Xelaev18025168m|PAC4GC:7365071|ptprf.S	KVEVDSVN#STSVR	KVEVDSVN(1)STSVR	240770000	0.0672042
gnl|Xelaev18025168m|PAC4GC:7365071|ptprf.S	ITN#YTVVYR	ITN(1)YTVVYR	135740000	0.037888
gnl|Xelaev18025245m|PAC4GC:7364626|efcab14.S	LYNVDTILTN#LTQR	LYNVDTILTN(1)LTQR	20208000	0.0056405
gnl|Xelaev18025245m|PAC4GC:7364626|efcab14.S	LWSN#ITDMNK	LWSN(0.999)ITDMNK	19726000	0.00550596
gnl|Xelaev18025282m|PAC4GC:7365170|gpx7.S	KN#YSVSFPMFSK	KN(1)YSVSFPMFSK	12400000	0.00346111
gnl|Xelaev18025327m|PAC4GC:7365058|angptl1.S	ILN#VTSEMLR	ILN(1)VTSEMLR	15221000	0.00424852
gnl|Xelaev18025335m|PAC4GC:7365331|lamc1.S	LLQN#LTAIK	LLQN(1)LTAIK	391340000	0.109232
gnl|Xelaev18025335m|PAC4GC:7365331|lamc1.S	VNDN#KTAAEAALR	VNDN(1)KTAAEAALR	235190000	0.0656467
gnl|Xelaev18025335m|PAC4GC:7365331|lamc1.S	MAEMASN#ATQEAESNANR	MAEMASN(1)ATQEAESNANR	13997000	0.00390687
gnl|Xelaev18025354m|PAC4GC:7365131|tor1aip2.S	AYATSLN#SSWNLIDGPSK	AYATSLN(1)SSWNLIDGPSK	48061000	0.0134149
gnl|Xelaev18025378m|PAC4GC:7364277|f3.S	FSN#GSFK	FSN(1)GSFK	30581000	0.00853583
gnl|Xelaev18025399m|PAC4GC:7365618|tgfbr3.S	YEAGN#FSLFSETVEK	YEAGN(1)FSLFSETVEK	24044000	0.00671121
gnl|Xelaev18025419m|PAC4GC:7364843|hs2st1.S	YHVLHIN#TTK	YHVLHIN(1)TTK	181680000	0.0507109
gnl|Xelaev18025476m|PAC4GC:7364172|col5a3-like.S	VYCN#FTAGGETCIYPEKK	VYCN(1)FTAGGETCIYPEKK	14615000	0.00407937
gnl|Xelaev18025520m|PAC4GC:7365812|edem3.S	LLPAFN#TTSGLPYPR	LLPAFN(1)TTSGLPYPR	309850000	0.086486
gnl|Xelaev18025520m|PAC4GC:7365812|edem3.S	FSLTLIDTLDTLVVLN#K.T	FSLTLIDTLDTLVVLN(1)K.T	931720	0.000260064
gnl|Xelaev18025648m|PAC4GC:7365640|mgat3.S	QMLLN#GTFDYIK	QMLLN(1)GTFDYIK	28117000	0.00784808
gnl|Xelaev18025716m|PAC4GC:7364514|elfn2.S	LTN#LSEGMLR	LTN(1)LSEGMLR	16306000	0.00455136
gnl|Xelaev18025773m|PAC4GC:7364050|sema3f.S	LIQPWN#R.T	LIQPWN(1)R.T	35927000	0.010028
gnl|Xelaev18025773m|PAC4GC:7364050|sema3f.S	ASGTAHFLSFLLN#TTDYR	ASGTAHFLSFLLN(1)TTDYR	5894600	0.00164531
gnl|Xelaev18025781m|PAC4GC:7365672|hyal2.S	LGMYPYYDEHGAPVSGGLPQN#ASLR	LGMYPYYDEHGAPVSGGLPQN(1)ASLR	215210000	0.0600699
gnl|Xelaev18025781m|PAC4GC:7365672|hyal2.S	QDN#ITDAFLHLNSANFQIVSAPK	QDN(1)ITDAFLHLNSANFQIVSAPK	6341100	0.00176994
gnl|Xelaev18025781m|PAC4GC:7365672|hyal2.S	LFDLNASPNEGFVDQN#LTIFYK	LFDLNASPNEGFVDQN(1)LTIFYK	3849500	0.00107448
gnl|Xelaev18025796m|PAC4GC:7364745|cacna2d2.S	VNYN#YTAVQIPTDIYK	VNYN(0.999)YTAVQIPTDIYK	209250000	0.0584063
gnl|Xelaev18025796m|PAC4GC:7364745|cacna2d2.S	AGFEYAFSQLQN#TSITR	AGFEYAFSQLQN(1)TSITR	111590000	0.0311472
gnl|Xelaev18025796m|PAC4GC:7364745|cacna2d2.S	GSTVILNELN#WTDALEDVFIQNR	GSTVILNELN(0.99)WTDALEDVFIQNR	54874000	0.0153165
gnl|Xelaev18025796m|PAC4GC:7364745|cacna2d2.S	YNWPN#KTVR	YNWPN(1)KTVR	45534000	0.0127095
gnl|Xelaev18025796m|PAC4GC:7364745|cacna2d2.S	VLASN#QSERHPQGPHK	VLASN(1)QSERHPQGPHK	37364000	0.0104291
gnl|Xelaev18025796m|PAC4GC:7364745|cacna2d2.S	AADDWMEDLEPHN#ATYYR	AADDWMEDLEPHN(1)ATYYR	5758200	0.00160724
gnl|Xelaev18025805m|PAC4GC:7364959|abhd14a.S	ESESLSSDPQSN#ITVR	ESESLSSDPQSN(1)ITVR	53131000	0.01483
gnl|Xelaev18025820m|PAC4GC:7364792|itih4.S	FLEAHGTFITNELTDVVQIN#RTEK	FLEAHGTFITNELTDVVQIN(1)RTEK	101410000	0.0283058
gnl|Xelaev18025821m|PAC4GC:7364733|fbln2.S	YNAPHIFN#ISR	YNAPHIFN(1)ISR	68983000	0.0192547
gnl|Xelaev18025838m|PAC4GC:7365715|lrrn1.S	VN#GTLLDGTQALR	VN(1)GTLLDGTQALR	63858000	0.0178242
gnl|Xelaev18025863m|PAC4GC:7364345|Xelaev18025863m	MN#GTEGPNFYVPMSN#K.T	MN(1)GTEGPNFYVPMSN(1)K.T	1297600000	0.362189
gnl|Xelaev18025865m|PAC4GC:7364535|plxnd1.S	ALN#LTSSEK	ALN(1)LTSSEK	39439000	0.0110083
gnl|Xelaev18025888m|PAC4GC:7364971|plxna1.S	ATLYNSEVHYN#YTEDPTVQK	ATLYNSEVHYN(0.991)YTEDPTVQK	21926000	0.00612003
gnl|Xelaev18025985m|PAC4GC:7365781|gxylt2.S	RFN#DTQLAAMAPEHEISK	RFN(1)DTQLAAMAPEHEISK	15232000	0.00425159
gnl|Xelaev18026036m|PAC4GC:7364935|ptprg.S	VEFHWGQSN#ASAGSEHSINGR	VEFHWGQSN(1)ASAGSEHSINGR	57677000	0.0160989
gnl|Xelaev18026042m|PAC4GC:7365019|fam3d.S	GLNIALIN#ASTGALIK	GLNIALIN(1)ASTGALIK	123880000	0.0345776
gnl|Xelaev18026103m|PAC4GC:7327808|nrxn1.L	N#TTLILDKESK	N(1)TTLILDKESK	5208600	0.00145384
gnl|Xelaev18026124m|PAC4GC:7329112|epcam.L	RN#NSDSVNDDVLIQALK	RN(0.961)NSDSVNDDVLIQALK	1065700000	0.29746
gnl|Xelaev18026124m|PAC4GC:7329112|epcam.L	QN#GTQKLPGEVDIIDVGYYMEK	QN(1)GTQKLPGEVDIIDVGYYMEK	290460000	0.0810738
gnl|Xelaev18026155m|PAC4GC:7327364|slc3a1.L	LQNPDTISN#YSELFHDYTTTQVGMHDIIR	LQNPDTISN(0.99)YSELFHDYTTTQVGMHDIIR	23070000	0.00643935
gnl|Xelaev18026253m|PAC4GC:7328295|mia3-like.1.L	VTLPEAIQLLTSLLN#TTK	VTLPEAIQLLTSLLN(1)TTK	9055100	0.00252748
gnl|Xelaev18026259m|PAC4GC:7326891|tlr5.L	FSSALN#GTK	FSSALN(1)GTK	17571000	0.00490445
gnl|Xelaev18026376m|PAC4GC:7328881|naglu.L	AWMFMHN#ASSSLGK	AWMFMHN(1)ASSSLGK	102130000	0.0285067
gnl|Xelaev18026376m|PAC4GC:7328881|naglu.L	ASEFSVTVN#SSLAEEGLDTYK	ASEFSVTVN(1)SSLAEEGLDTYK	37753000	0.0105377
gnl|Xelaev18026427m|PAC4GC:7328799|ptk7.L	IQVMPN#GSLVIYR	IQVMPN(1)GSLVIYR	120330000	0.0335868
gnl|Xelaev18026427m|PAC4GC:7328799|ptk7.L	FEVFPN#GTLK	FEVFPN(1)GTLK	101890000	0.0284398
gnl|Xelaev18026427m|PAC4GC:7328799|ptk7.L	ASLEPN#ITWYR	ASLEPN(1)ITWYR	56954000	0.0158971
gnl|Xelaev18026446m|PAC4GC:7327791|cnpy3.L	VVMDIPYELWN#ETSAEVADMKK	VVMDIPYELWN(1)ETSAEVADMKK	317310000	0.0885682
gnl|Xelaev18026574m|PAC4GC:7327150|LOC100485177.L	VSPN#GTLYVADAYQGIFEVNPVTGAVK	VSPN(1)GTLYVADAYQGIFEVNPVTGAVK	199790000	0.0557658
gnl|Xelaev18026589m|PAC4GC:7328670|tmem87b.L	KTLYN#STNIK	KTLYN(1)STNIK	136710000	0.0381588
gnl|Xelaev18026599m|PAC4GC:7327595|mertk.L	VYGRDEVEYVEYSN#STAAFLPIK	VYGRDEVEYVEYSN(1)STAAFLPIK	3530000	0.000985301
gnl|Xelaev18026614m|PAC4GC:7328494|LOC100135146.L	QNSEDLVIN#MTVPVR	QNSEDLVIN(1)MTVPVR	1112900000	0.310635
gnl|Xelaev18026614m|PAC4GC:7328494|LOC100135146.L	IYN#ATNWVTTSLK	IYN(1)ATNWVTTSLK	891000000	0.248698
gnl|Xelaev18026614m|PAC4GC:7328494|LOC100135146.L	LLNYINKQNSEDLVIN#MTVPVR	LLNYINKQNSEDLVIN(0.999)MTVPVR	23063000	0.00643739
gnl|Xelaev18026686m|PAC4GC:7327926|igf2r.L	GAGSYQN#QTLR	GAGSYQN(1)QTLR	291050000	0.0812385
gnl|Xelaev18026686m|PAC4GC:7327926|igf2r.L	LILEYTN#GSECTDSSGAK	LILEYTN(1)GSECTDSSGAK	185540000	0.0517883
gnl|Xelaev18026686m|PAC4GC:7327926|igf2r.L	DYLESNSCN#LTSK	DYLESNSCN(0.998)LTSK	176500000	0.0492651
gnl|Xelaev18026686m|PAC4GC:7327926|igf2r.L	WEN#GTSILEYK	WEN(1)GTSILEYK	161890000	0.0451871
gnl|Xelaev18026686m|PAC4GC:7327926|igf2r.L	ISPSVCPSAQN#VSSCQVK	ISPSVCPSAQN(1)VSSCQVK	72894000	0.0203463
gnl|Xelaev18026686m|PAC4GC:7327926|igf2r.L	LIFENGLIMIN#YTDGER	LIFENGLIMIN(1)YTDGER	59742000	0.0166753
gnl|Xelaev18026686m|PAC4GC:7327926|igf2r.L	NGILSLDDGVNVN#LTDIYFK	NGILSLDDGVNVN(0.989)LTDIYFK	46785000	0.0130587
gnl|Xelaev18026686m|PAC4GC:7327926|igf2r.L	CFVNN#GTSLIDLTPLIK	CFVNN(1)GTSLIDLTPLIK	45914000	0.0128156
gnl|Xelaev18026686m|PAC4GC:7327926|igf2r.L	N#TSQQVGLSGDSSAQISK	N(1)TSQQVGLSGDSSAQISK	37141000	0.0103669
gnl|Xelaev18026686m|PAC4GC:7327926|igf2r.L	LSYYDGILQLHYTN#GTPYQDPGKTPR	LSYYDGILQLHYTN(1)GTPYQDPGKTPR	30966000	0.00864329
gnl|Xelaev18026686m|PAC4GC:7327926|igf2r.L	NLLLFN#ATQQCSGSEHHVQSSINLICGK	NLLLFN(0.945)ATQQCSGSEHHVQSSINLICGK	7159000	0.00199824
gnl|Xelaev18026780m|PAC4GC:7328484|thbs2.L	VVN#STTGTGEHLR	VVN(1)STTGTGEHLR	502180000	0.14017
gnl|Xelaev18026911m|PAC4GC:7326836|ero1b.L	LGAVN#STLSNQSK	LGAVN(1)STLSNQSK	5367000	0.00149805
gnl|Xelaev18026968m|PAC4GC:7327947|enpp3.L	LYN#NSVVYEER	LYN(0.952)NSVVYEER	16503000	0.00460635
gnl|Xelaev18026968m|PAC4GC:7327947|enpp3.L	AGTFFWPGSDVAIN#GSFPSLYK	AGTFFWPGSDVAIN(1)GSFPSLYK	2222800	0.000620433
gnl|Xelaev18026982m|PAC4GC:7328461|lama2.L	AADDLSVVNQQN#MTGLER	AADDLSVVNQQN(0.991)MTGLER	85440000	0.0238482
gnl|Xelaev18026982m|PAC4GC:7328461|lama2.L	WNPN#ISTITFK	WNPN(1)ISTITFK	28227000	0.00787878
gnl|Xelaev18026982m|PAC4GC:7328461|lama2.L	MLFNFGN#QTQELK	MLFNFGN(0.998)QTQELK	18995000	0.00530192
gnl|Xelaev18026982m|PAC4GC:7328461|lama2.L	QTAYLFVDNISN#STVSPK	QTAYLFVDNISN(0.993)STVSPK	9660100	0.00269635
gnl|Xelaev18026985m|PAC4GC:7327636|LOC100487326.L	GPLANPIWN#VTGSTGK	GPLANPIWN(0.999)VTGSTGK	14344000	0.00400373
gnl|Xelaev18026987m|PAC4GC:7328602|ptprk.L	APQHIVDNLPPYTN#VSLK	APQHIVDNLPPYTN(1)VSLK	49548000	0.0138299
gnl|Xelaev18027017m|PAC4GC:7328742|smpdl3a.L	VTVN#MTDPANQFEWLEDTLK	VTVN(1)MTDPANQFEWLEDTLK	22563000	0.00629783
gnl|Xelaev18027035m|PAC4GC:7327300|fuca2.L	RDLVGELALAIKN#TTK	RDLVGELALAIKN(1)TTK	30899000	0.00862459
gnl|Xelaev18027146m|PAC4GC:7328435|fam26d.L	FLSQFPCAQFVPAN#LTR	FLSQFPCAQFVPAN(1)LTR	9463400	0.00264144
gnl|Xelaev18027173m|PAC4GC:7326858|lama4.L	WPTNN#ISSSILR	WPTNN(1)ISSSILR	81605000	0.0227778
gnl|Xelaev18027173m|PAC4GC:7326858|lama4.L	N#LTEVVPLLLNK	N(1)LTEVVPLLLNK	24944000	0.00696242
gnl|Xelaev18027173m|PAC4GC:7326858|lama4.L	LAN#LSHNVENIVEEAVTHSLNLQR	LAN(0.94)LSHNVENIVEEAVTHSLNLQR	16932000	0.0047261
gnl|Xelaev18027208m|PAC4GC:7328395|ostm1.L	ALCIDLEDAMN#STR	ALCIDLEDAMN(1)STR	62774000	0.0175216
gnl|Xelaev18027208m|PAC4GC:7328395|ostm1.L	LLAEFAN#HSAALSSCLVSNAR	LLAEFAN(1)HSAALSSCLVSNAR	42555000	0.011878
gnl|Xelaev18027304m|PAC4GC:7328203|nt5e.L	EAIKN#YSAQSIGK	EAIKN(1)YSAQSIGK	48315000	0.0134858
gnl|Xelaev18027304m|PAC4GC:7328203|nt5e.L	ISN#GTITTEDLISVLPFEGTYDLIEIK	ISN(1)GTITTEDLISVLPFEGTYDLIEIK	9054200	0.00252723
gnl|Xelaev18027319m|PAC4GC:7328838|prss35.L	NLPSPSLADLEEYLSYETIFDN#GTR	NLPSPSLADLEEYLSYETIFDN(1)GTR	37204000	0.0103845
gnl|Xelaev18027319m|PAC4GC:7328838|prss35.L	DVSHN#MSLDYDYAVLELK	DVSHN(1)MSLDYDYAVLELK	14071000	0.00392753
gnl|Xelaev18027329m|PAC4GC:7327683|tpbg.L	HLDLSN#NSLTSLSADIFK	HLDLSN(0.974)NSLTSLSADIFK	33480000	0.00934501
gnl|Xelaev18027359m|PAC4GC:7328645|LOC100497103.L	VGLQFHN#DTK	VGLQFHN(1)DTK	162290000	0.0452987
gnl|Xelaev18027449m|PAC4GC:7328926|LOC100485319.L	YLN#RTEGLLGLYNGDPSDDLVSADGQTLPYN#TSTK	YLN(0.999)RTEGLLGLYNGDPSDDLVSADGQTLPYN(0.998)TSTK	2239900	0.000625206
gnl|Xelaev18027450m|PAC4GC:7328770|Xelaev18027450m	LASECGYN#QTTTVK	LASECGYN(1)QTTTVK	34531000	0.00963837
gnl|Xelaev18027450m|PAC4GC:7328770|Xelaev18027450m	IYFNPYGPTNEKEATGN#VSQYIN#STR	IYFNPYGPTNEKEATGN(0.97)VSQYIN(0.999)STR	11888000	0.0033182
gnl|Xelaev18027484m|PAC4GC:7326899|p3h2.L	LVHSSDFLN#GTQR	LVHSSDFLN(1)GTQR	141060000	0.039373
gnl|Xelaev18027495m|PAC4GC:7327272|zan.L	VYN#HTIIFSQK	VYN(1)HTIIFSQK	19512000	0.00544623
gnl|Xelaev18027495m|PAC4GC:7327272|zan.L	LCANDSN#LTDFNVEAANDLR	LCANDSN(0.905)LTDFNVEAANDLR	5670900	0.00158287
gnl|Xelaev18027495m|PAC4GC:7327272|zan.L	LCEVN#SSLTDFNVEVAHEYR	LCEVN(0.998)SSLTDFNVEVAHEYR	4954800	0.00138299
gnl|Xelaev18027495m|PAC4GC:7327272|zan.L	QDDEYLLPNGLQAIN#VTHFGNSWK	QDDEYLLPNGLQAIN(0.996)VTHFGNSWK	4635000	0.00129373
gnl|Xelaev18027495m|PAC4GC:7327272|zan.L	NNMVLIN#GTSVTLPVTVSGISIVQNGQYVK	NNMVLIN(0.98)GTSVTLPVTVSGISIVQNGQYVK	4042100	0.00112824
gnl|Xelaev18027495m|PAC4GC:7327272|zan.L	LCTTDAN#LTDFTVEAANDLR	LCTTDAN(1)LTDFTVEAANDLR	2931600	0.000818274
gnl|Xelaev18027495m|PAC4GC:7327272|zan.L	NDVN#LTDFNVEAANDLR	NDVN(1)LTDFNVEAANDLR	1903900	0.000531421
gnl|Xelaev18027506m|PAC4GC:7327897|fetub.L	LIADYNKDSN#NTR	LIADYNKDSN(1)NTR	8618900000	2.40573
gnl|Xelaev18027506m|PAC4GC:7327897|fetub.L	LIYYN#CTITTVHPR	LIYYN(1)CTITTVHPR	6803200000	1.89892
gnl|Xelaev18027506m|PAC4GC:7327897|fetub.L	TQENVILSN#CSFVDDR	TQENVILSN(1)CSFVDDR	6297400	0.00175774
gnl|Xelaev18027507m|PAC4GC:7328372|fetub.L	RIAHLHTYN#CTLR	RIAHLHTYN(1)CTLR	7531400000	2.10218
gnl|Xelaev18027507m|PAC4GC:7328372|fetub.L	ITDAKEEFNIEN#GTVYQLTLDVVETECHVLSR	ITDAKEEFNIEN(1)GTVYQLTLDVVETECHVLSR	577060000	0.16107
gnl|Xelaev18027507m|PAC4GC:7328372|fetub.L	KYNSENNFNSYFSLAN#ITR	KYNSENNFNSYFSLAN(1)ITR	429710000	0.119942
gnl|Xelaev18027507m|PAC4GC:7328372|fetub.L	QPESSAVACN#DSVVEAAADLSLR	QPESSAVACN(1)DSVVEAAADLSLR	393910000	0.109949
gnl|Xelaev18027507m|PAC4GC:7328372|fetub.L	YNSENNFNSYFSLAN#ITR	YNSENNFNSYFSLAN(1)ITR	7521300	0.00209936
gnl|Xelaev18027585m|PAC4GC:7328550|slc2a2.L	VLLEGSAN#ETDTK	VLLEGSAN(1)ETDTK	60987000	0.0170228
gnl|Xelaev18027628m|PAC4GC:7328341|mgam.L	FIILLDPAIAGN#ETKPYPAFTR	FIILLDPAIAGN(1)ETKPYPAFTR	120440000	0.0336175
gnl|Xelaev18027628m|PAC4GC:7328341|mgam.L	HQDPASYGADSLLVN#SSR	HQDPASYGADSLLVN(1)SSR	85726000	0.023928
gnl|Xelaev18027628m|PAC4GC:7328341|mgam.L	VIIILDPAIAVN#ETKDYPPYR	VIIILDPAIAVN(1)ETKDYPPYR	25268000	0.00705286
gnl|Xelaev18027628m|PAC4GC:7328341|mgam.L	YKN#GSSPIQTLR	YKN(1)GSSPIQTLR	22801000	0.00636426
gnl|Xelaev18027628m|PAC4GC:7328341|mgam.L	QMDFTLGQN#FSGLPAVVDK	QMDFTLGQN(1)FSGLPAVVDK	22692000	0.00633384
gnl|Xelaev18027628m|PAC4GC:7328341|mgam.L	KN#GTVQPSNHQVIYDSNTQIAK	KN(0.977)GTVQPSNHQVIYDSNTQIAK	11268000	0.00314515
gnl|Xelaev18027665m|PAC4GC:7327295|ptx3.L	KENDLENAVLLNFN#ISER	KENDLENAVLLNFN(0.99)ISER	15640000	0.00436547
gnl|Xelaev18027696m|PAC4GC:7326919|aadac.L	YVN#WSTLLPDHLKK	YVN(1)WSTLLPDHLKK	50554000	0.0141107
gnl|Xelaev18027697m|PAC4GC:7327632|igsf10.L	LLDN#GTLVIQETAIHDR	LLDN(1)GTLVIQETAIHDR	13559000	0.00378462
gnl|Xelaev18027734m|PAC4GC:7326886|plod2.L	LTHLHEGLPVTN#GTR	LTHLHEGLPVTN(1)GTR	6777300000	1.89169
gnl|Xelaev18027734m|PAC4GC:7326886|plod2.L	GNIN#ITLDHK	GNIN(1)ITLDHK	2196500000	0.613092
gnl|Xelaev18027734m|PAC4GC:7326886|plod2.L	YISAN#YSK	YISAN(1)YSK	115490000	0.0322358
gnl|Xelaev18027734m|PAC4GC:7326886|plod2.L	YN#CSIDSPR	YN(1)CSIDSPR	70429000	0.0196583
gnl|Xelaev18027770m|PAC4GC:7328168|pxylp1.L	YALMATHPLLN#QTANR	YALMATHPLLN(0.975)QTANR	42535000	0.0118725
gnl|Xelaev18027773m|PAC4GC:7329131|loc100145763.L	AQVN#FSEYLEVVQLALALN#HSDCPEAIK	AQVN(1)FSEYLEVVQLALALN(1)HSDCPEAIK	121020000	0.0337794
gnl|Xelaev18027773m|PAC4GC:7329131|loc100145763.L	YFVN#DTYMQSGGPVFLMIGGEGPANPAWMNSGAWLSYAEK	YFVN(0.947)DTYMQSGGPVFLMIGGEGPANPAWMNSGAWLSYAEK	25740000	0.0071846
gnl|Xelaev18027827m|PAC4GC:7327689|sned1.L	IAN#TTNVGVPGR	IAN(0.998)TTNVGVPGR	77032000	0.0215013
gnl|Xelaev18027923m|PAC4GC:7328249|atp1b3.L	ISPSN#FTSEEISVECK	ISPSN(1)FTSEEISVECK	555590000	0.155077
gnl|Xelaev18027923m|PAC4GC:7328249|atp1b3.L	FTQNKPQSYMEYVQVLNTFLAPYN#DSLQAK	FTQNKPQSYMEYVQVLNTFLAPYN(1)DSLQAK	321520000	0.0897433
gnl|Xelaev18028005m|PAC4GC:7328140|pxdn.L	VFCN#LSTVQTFEDLR	VFCN(1)LSTVQTFEDLR	28740000	0.00802197
gnl|Xelaev18028032m|PAC4GC:7326832|adam17.L	GYGVQIEQIIVHKEPEN#VTQGQK	GYGVQIEQIIVHKEPEN(1)VTQGQK	115490000	0.0322358
gnl|Xelaev18028086m|PAC4GC:7328886|zpax.L	IGYGIN#TTESR	IGYGIN(1)TTESR	148060000	0.0413268
gnl|Xelaev18028086m|PAC4GC:7328886|zpax.L	LIDCFPN#GTIAVTVLK	LIDCFPN(1)GTIAVTVLK	2309200	0.000644549
gnl|Xelaev18028109m|PAC4GC:7329038|apob.L	MTN#DSNSFVASLDASSSSTLR	MTN(1)DSNSFVASLDASSSSTLR	200330000	0.0559165
gnl|Xelaev18028109m|PAC4GC:7329038|apob.L	LKLPSGPYTISIPAMGN#LTYDFSFK	LKLPSGPYTISIPAMGN(1)LTYDFSFK	8402700	0.00234538
gnl|Xelaev18028143m|PAC4GC:7328740|adgrf1.L	ITSIAPFEITN#K.T	ITSIAPFEITN(1)K.T	54347000	0.0151694
gnl|Xelaev18028144m|PAC4GC:7327182|Xelaev18028144m	LMPAFIESLSN#NSVTNK	LMPAFIESLSN(0.916)NSVTNK	25477000	0.00711119
gnl|Xelaev18028157m|PAC4GC:7327333|enpp4.L	YGPDDYGN#MSGVLK	YGPDDYGN(1)MSGVLK	86314000	0.0240921
gnl|Xelaev18028157m|PAC4GC:7327333|enpp4.L	LNDCIGPGN#YTLVDDNPVASILPISDTK	LNDCIGPGN(0.986)YTLVDDNPVASILPISDTK	4186200	0.00116846
gnl|Xelaev18028158m|PAC4GC:7327280|LOC100487005.L	IN#LTGTIAIVR	IN(1)LTGTIAIVR	5247600	0.00146472
gnl|Xelaev18028158m|PAC4GC:7327280|LOC100487005.L	RAESEITQDQKDPDILQPFLAFAPN#GTAK	RAESEITQDQKDPDILQPFLAFAPN(1)GTAK	2198600	0.000613678
gnl|Xelaev18028377m|PAC4GC:7326990|clu.L	MFN#TTGILEQLNK	MFN(1)TTGILEQLNK	36783000	0.0102669
gnl|Xelaev18028428m|PAC4GC:7327916|pigx.L	HHN#LTEVLLLTAVDVEAPEYLSK	HHN(1)LTEVLLLTAVDVEAPEYLSK	5157300	0.00143952
gnl|Xelaev18028481m|PAC4GC:7324286|b3gnt2.S	DSFFN#LTLK	DSFFN(1)LTLK	12534000	0.00349852
gnl|Xelaev18028511m|PAC4GC:7323186|pcsk2.S	RGDLNIN#MTSPMGTK	RGDLNIN(0.945)MTSPMGTK	95636000	0.0266941
gnl|Xelaev18028511m|PAC4GC:7323186|pcsk2.S	YLEHVQAVITVN#STR	YLEHVQAVITVN(1)STR	25585000	0.00714134
gnl|Xelaev18028511m|PAC4GC:7323186|pcsk2.S	KRNPEAGVATTDLYGN#CTLR	KRNPEAGVATTDLYGN(1)CTLR	11377000	0.00317557
gnl|Xelaev18028517m|PAC4GC:7323943|flrt3.S	VFMNLIN#LTELSLVR	VFMNLIN(1)LTELSLVR	34188000	0.00954263
gnl|Xelaev18028545m|PAC4GC:7322754|ptk7.S	IQIMPN#GSLVIYHVTNEDAGK	IQIMPN(0.999)GSLVIYHVTNEDAGK	9305600	0.0025974
gnl|Xelaev18028661m|PAC4GC:7322601|mia3-like.1.S	LEDSQGGNFAN#DSK	LEDSQGGNFAN(0.999)DSK	21135000	0.00589925
gnl|Xelaev18028769m|PAC4GC:7322904|epcam.S	QN#GSQKLPGEVDITDVAYYMEK	QN(1)GSQKLPGEVDITDVAYYMEK	210620000	0.0587887
gnl|Xelaev18028769m|PAC4GC:7322904|epcam.S	RN#NTDSVNDDDLK	RN(0.907)NTDSVNDDDLK	203790000	0.0568823
gnl|Xelaev18028812m|PAC4GC:7324241|lrrn4.S	KYQLIYHPEGDKN#QTVVDNIYITSR	KYQLIYHPEGDKN(0.995)QTVVDNIYITSR	14443000	0.00403136
gnl|Xelaev18028915m|PAC4GC:7322532|LOC100216148.S	YVSN#ETLFR	YVSN(1)ETLFR	1023300000	0.285626
gnl|Xelaev18028915m|PAC4GC:7322532|LOC100216148.S	GGN#ITVLSDPYPR	GGN(1)ITVLSDPYPR	940740000	0.262581
gnl|Xelaev18028944m|PAC4GC:7323495|LOC101733258.S	LWDTAFDSVALSN#LSCDQK	LWDTAFDSVALSN(1)LSCDQK	1861700	0.000519642
gnl|Xelaev18028979m|PAC4GC:7322516|ltbp1.S	GN#TTTLISENGHSADTLTSSNFR	GN(1)TTTLISENGHSADTLTSSNFR	6001700	0.00167521
gnl|Xelaev18029055m|PAC4GC:7323657|agt.S	QN#HTIEVFFTPVSVETNISPEEETLGSTGALETK	QN(1)HTIEVFFTPVSVETNISPEEETLGSTGALETK	10175000	0.00284007
gnl|Xelaev18029246m|PAC4GC:7323800|dse.S	FLEVIAN#ASANMYETSFR	FLEVIAN(0.996)ASANMYETSFR	4755400	0.00132734
gnl|Xelaev18029418m|PAC4GC:7323076|prss35.S	NLPLPSLADLEEYLSYETIYDN#GTR	NLPLPSLADLEEYLSYETIYDN(1)GTR	1517300	0.000423512
gnl|Xelaev18029423m|PAC4GC:7323806|tpbg.S	DLGHLETLDLSN#NSLKR	DLGHLETLDLSN(0.98)NSLKR	101110000	0.028222
gnl|Xelaev18029423m|PAC4GC:7323806|tpbg.S	MSN#LSFQGAGSGIIPLKELK	MSN(1)LSFQGAGSGIIPLKELK	40321000	0.0112545
gnl|Xelaev18029459m|PAC4GC:7323365|col12a1.S	NLQVFN#ATSNSLTVR	NLQVFN(0.999)ATSNSLTVR	20357000	0.00568209
gnl|Xelaev18029460m|PAC4GC:7324165|slc17a5.S	ENTTANVCPDHTTAPTILHN#STGR	ENTTANVCPDHTTAPTILHN(1)STGR	31095000	0.0086793
gnl|Xelaev18029544m|PAC4GC:7324204|ece2.S	IGGWN#ISGNWR	IGGWN(1)ISGNWR	28708000	0.00801304
gnl|Xelaev18029551m|PAC4GC:7324100|alg3.S	AYMDEVEGVLN#GTYDYTQLK	AYMDEVEGVLN(1)GTYDYTQLK	157280000	0.0439003
gnl|Xelaev18029597m|PAC4GC:7323587|il1rap.S	YPQGLN#LTFLVVR	YPQGLN(1)LTFLVVR	3011600	0.000840604
gnl|Xelaev18029617m|PAC4GC:7323296|LOC101732807.S	FGYLLHTDN#R.T	FGYLLHTDN(1)R.T	15984000	0.00446149
gnl|Xelaev18029625m|PAC4GC:7323230|slc51a.S	QLVDLLIAN#YSVPK	QLVDLLIAN(1)YSVPK	21654000	0.00604411
gnl|Xelaev18029626m|PAC4GC:7322965|tfrc.S	HIIYGTGN#HTVAALMDHLR	HIIYGTGN(1)HTVAALMDHLR	15359000	0.00428704
gnl|Xelaev18029632m|PAC4GC:7322720|muc4.S	LSN#FTAPR	LSN(1)FTAPR	464600000	0.12968
gnl|Xelaev18029632m|PAC4GC:7322720|muc4.S	YVTN#RTDVEYLNNNLVK	YVTN(1)RTDVEYLNNNLVK	59924000	0.0167261
gnl|Xelaev18029632m|PAC4GC:7322720|muc4.S	IFFNSNGPTNEEEAKGN#VSQK	IFFNSNGPTNEEEAKGN(1)VSQK	35938000	0.0100311
gnl|Xelaev18029632m|PAC4GC:7322720|muc4.S	NDN#GTIFR	NDN(1)GTIFR	23049000	0.00643349
gnl|Xelaev18029645m|PAC4GC:7323111|b3gnt5.S	FKDLIQQDFSDTFHN#LTLK	FKDLIQQDFSDTFHN(1)LTLK	22815000	0.00636817
gnl|Xelaev18029648m|PAC4GC:7324149|Xelaev18029648m	EAHVGFCSGSMMN#STFDGTEHK	EAHVGFCSGSMMN(1)STFDGTEHK	4895000000	1.3663
gnl|Xelaev18029653m|PAC4GC:7323945|mfi2.S	AIAN#QTYQAWLADEYLQAVK	AIAN(1)QTYQAWLADEYLQAVK	23295000	0.00650215
gnl|Xelaev18029653m|PAC4GC:7323945|mfi2.S	KN#STYTINNLK	KN(1)STYTINNLK	13007000	0.00363054
gnl|Xelaev18029666m|PAC4GC:7323168|lrrc15.S	LQN#ISLHSNK	LQN(1)ISLHSNK	35097000	0.00979635
gnl|Xelaev18029674m|PAC4GC:7324083|lamp3-like.S	AMMGLELELTN#SSK	AMMGLELELTN(1)SSK	625490000	0.174588
gnl|Xelaev18029674m|PAC4GC:7324083|lamp3-like.S	IQLGDTINLVMTN#VTLQAFNIK	IQLGDTINLVMTN(1)VTLQAFNIK	13131000	0.00366515
gnl|Xelaev18029714m|PAC4GC:7323962|slc2a2.S	VLLEGSEN#ETDTK	VLLEGSEN(1)ETDTK	57453000	0.0160364
gnl|Xelaev18029773m|PAC4GC:7323346|vn2r1p.S	AVEGTLSFLTGQN#ETHPNFR	AVEGTLSFLTGQN(1)ETHPNFR	17191000	0.00479839
gnl|Xelaev18029825m|PAC4GC:7323085|plod2.S	EKYINAN#YSK	EKYINAN(0.95)YSK	42614000	0.0118945
gnl|Xelaev18029825m|PAC4GC:7323085|plod2.S	YN#CSIESTR	YN(1)CSIESTR	12929000	0.00360877
gnl|Xelaev18029917m|PAC4GC:7323763|gpc1.S	NFDSYFQDLLN#TSER	NFDSYFQDLLN(1)TSER	97035000	0.0270846
gnl|Xelaev18029950m|PAC4GC:7323193|dner.S	LVSFEVAEN#TSVK	LVSFEVAEN(1)TSVK	18234000	0.00508951
gnl|Xelaev18029958m|PAC4GC:7323194|atp1b3.S	ISPSN#FTSEEIAVECK	ISPSN(1)FTSEEIAVECK	351460000	0.0981003
gnl|Xelaev18029958m|PAC4GC:7323194|atp1b3.S	IIGLKPEGNPKIN#CTSK	IIGLKPEGNPKIN(0.995)CTSK	10428000	0.00291069
gnl|Xelaev18030121m|PAC4GC:7323123|apob.S	GLNN#DSLGPLVPR	GLNN(1)DSLGPLVPR	4877300000	1.36136
gnl|Xelaev18030121m|PAC4GC:7323123|apob.S	MTN#NSNNFVASLDASSSSTLR	MTN(0.97)NSNNFVASLDASSSSTLR	134390000	0.0375112
gnl|Xelaev18030121m|PAC4GC:7323123|apob.S	LPSGPHTISIPAMGN#LTYDFSFK	LPSGPHTISIPAMGN(1)LTYDFSFK	127460000	0.0355769
gnl|Xelaev18030121m|PAC4GC:7323123|apob.S	QYLN#VSTSVTYTK	QYLN(1)VSTSVTYTK	13818000	0.00385691
gnl|Xelaev18030174m|PAC4GC:7322594|crisp2.S	DAAQNAGN#WSATCSMSHSTSDKR	DAAQNAGN(0.998)WSATCSMSHSTSDKR	55005000	0.0153531
gnl|Xelaev18030302m|PAC4GC:7323472|tmem214.S	VSN#YSLQGQSWLER	VSN(1)YSLQGQSWLER	45663000	0.0127456
gnl|Xelaev18030317m|PAC4GC:7324314|loc100036907.S	VALVN#GTTACSGR	VALVN(1)GTTACSGR	29156000	0.00813808
gnl|Xelaev18030317m|PAC4GC:7324314|loc100036907.S	VELLYN#QTWGWLSDEK	VELLYN(1)QTWGWLSDEK	3066400	0.0008559
gnl|Xelaev18030542m|PAC4GC:7324670|ngfr.L	RTEGGEN#GTAAGSPHFIPQDNSK	RTEGGEN(1)GTAAGSPHFIPQDNSK	56586000	0.0157944
gnl|Xelaev18030614m|PAC4GC:7326151|sepn1.L	N#WTTAMLPENVFYAGQFK	N(0.999)WTTAMLPENVFYAGQFK	7273900	0.00203031
gnl|Xelaev18030636m|PAC4GC:7325192|LOC100497570.L	LVQN#SSQTGINWLSDGK	LVQN(1)SSQTGINWLSDGK	1263300000	0.352615
gnl|Xelaev18030636m|PAC4GC:7325192|LOC100497570.L	GDPGPMGPTGPSGTPGIN#GTK	GDPGPMGPTGPSGTPGIN(1)GTK	146120000	0.0407853
gnl|Xelaev18030637m|PAC4GC:7325958|LOC101733516-like.L	VLPESDN#YTLIIGK	VLPESDN(1)YTLIIGK	132580000	0.037006
gnl|Xelaev18030637m|PAC4GC:7325958|LOC101733516-like.L	YVAGDAGDSMIYSN#NSK	YVAGDAGDSMIYSN(0.982)NSK	120820000	0.0337235
gnl|Xelaev18030638m|PAC4GC:7325568|LOC100485621.L	DFN#NSAYYAK	DFN(0.984)NSAYYAK	44128000	0.0123171
gnl|Xelaev18030664m|PAC4GC:7324767|dpp6.L	VPIVTIYN#TTNR	VPIVTIYN(0.912)TTNR	34303000	0.00957473
gnl|Xelaev18030727m|PAC4GC:7325118|itgb1.L	LINPCTSDQN#CTSPFSYK	LINPCTSDQN(1)CTSPFSYK	39984000	0.0111604
gnl|Xelaev18030818m|PAC4GC:7326356|cubn.L	FTTDSTVSGTGFN#ASYHK	FTTDSTVSGTGFN(1)ASYHK	47345000	0.013215
gnl|Xelaev18030818m|PAC4GC:7326356|cubn.L	ILGVFCN#NTVPR	ILGVFCN(0.905)NTVPR	29233000	0.00815958
gnl|Xelaev18030818m|PAC4GC:7326356|cubn.L	EYN#QTFGYLK	EYN(1)QTFGYLK	20834000	0.00581523
gnl|Xelaev18030818m|PAC4GC:7326356|cubn.L	VIPCGGTFN#ASYGTLR	VIPCGGTFN(1)ASYGTLR	18674000	0.00521233
gnl|Xelaev18030818m|PAC4GC:7326356|cubn.L	EQFYIEPSEN#CSSSYLELR	EQFYIEPSEN(1)CSSSYLELR	9072500	0.00253234
gnl|Xelaev18030838m|PAC4GC:7326442|itga8.L	LVVCDLGNPMVAGTN#LSVGLR	LVVCDLGNPMVAGTN(1)LSVGLR	34354000	0.00958896
gnl|Xelaev18030838m|PAC4GC:7326442|itga8.L	LN#GTKQPVEFK	LN(1)GTKQPVEFK	17468000	0.0048757
gnl|Xelaev18030876m|PAC4GC:7325060|col1a2.L	LLANHASQN#ITYHCK	LLANHASQN(1)ITYHCK	390130000	0.108894
gnl|Xelaev18030881m|PAC4GC:7325164|pon2.L	VQNIHSDNPIVTQVYVNN#GSVIQASSSAAVYEGK	VQNIHSDNPIVTQVYVNN(1)GSVIQASSSAAVYEGK	178520000	0.0498289
gnl|Xelaev18030932m|PAC4GC:7326185|gpnmb.L	GHRQHYPVTKASLLYVVTDQIPFYVN#ISQK	GHRQHYPVTKASLLYVVTDQIPFYVN(1)ISQK	636110000	0.177552
gnl|Xelaev18031011m|PAC4GC:7325356|cpvl.L	KSIHVGN#LTFHDGSEVEK	KSIHVGN(1)LTFHDGSEVEK	200760000	0.0560366
gnl|Xelaev18031018m|PAC4GC:7325308|fkbp14.L	HGTDVN#ETHHEVLVESIFEKEDEDSDGFISAR	HGTDVN(1)ETHHEVLVESIFEKEDEDSDGFISAR	130950000	0.036551
gnl|Xelaev18031018m|PAC4GC:7325308|fkbp14.L	NGDLLLVHAEGFLEKN#GSR	NGDLLLVHAEGFLEKN(1)GSR	51657000	0.0144186
gnl|Xelaev18031022m|PAC4GC:7324745|btd.L	GAQIIVFPEDGIHGFN#YTR	GAQIIVFPEDGIHGFN(1)YTR	59689000	0.0166605
gnl|Xelaev18031064m|PAC4GC:7325263|slc4a7.L	AN#ITSSEVPWNNLTVTECVR	AN(1)ITSSEVPWNNLTVTECVR	4660200	0.00130076
gnl|Xelaev18031121m|PAC4GC:7326103|col6a3.L	FVEAVVN#DSLVGK	FVEAVVN(1)DSLVGK	63550000	0.0177382
gnl|Xelaev18031121m|PAC4GC:7326103|col6a3.L	AHEGVQQIAVIMTNGQSMDN#VTKPAAK	AHEGVQQIAVIMTNGQSMDN(1)VTKPAAK	23322000	0.00650969
gnl|Xelaev18031121m|PAC4GC:7326103|col6a3.L	ALEFVN#TTYFTQTAGSR	ALEFVN(1)TTYFTQTAGSR	4880800	0.00136234
gnl|Xelaev18031130m|PAC4GC:7326690|acpp.L	RYDTFLN#ESYR	RYDTFLN(1)ESYR	26288000	0.00733756
gnl|Xelaev18031130m|PAC4GC:7326690|acpp.L	LQGGVLLNSIIQN#ITYIK	LQGGVLLNSIIQN(1)ITYIK	20738000	0.00578843
gnl|Xelaev18031163m|PAC4GC:7325628|cdcp1.L	VQLEPPGLTGLN#R.T	VQLEPPGLTGLN(1)R.T	9744800	0.00271999
gnl|Xelaev18031198m|PAC4GC:7326670|glb1l.L	NILTTTQINN#ITVLELENSPCNSGK	NILTTTQINN(1)ITVLELENSPCNSGK	46606000	0.0130088
gnl|Xelaev18031198m|PAC4GC:7326670|glb1l.L	DKQTAIN#VTGAAGAELDLLVESMGR	DKQTAIN(1)VTGAAGAELDLLVESMGR	28925000	0.00807361
gnl|Xelaev18031198m|PAC4GC:7326670|glb1l.L	CGTIQGLYTTVDFGPGSN#ITETFLVQR	CGTIQGLYTTVDFGPGSN(1)ITETFLVQR	7523600	0.0021
gnl|Xelaev18031235m|PAC4GC:7325092|itga9.L	VLN#LTDNKYFK	VLN(1)LTDNKYFK	31488000	0.008789
gnl|Xelaev18031235m|PAC4GC:7325092|itga9.L	GPN#GSFFGYSVLEHYHDETR	GPN(1)GSFFGYSVLEHYHDETR	18576000	0.00518497
gnl|Xelaev18031235m|PAC4GC:7325092|itga9.L	QVPGEIELYYN#LSADVAKK	QVPGEIELYYN(1)LSADVAKK	5855700	0.00163446
gnl|Xelaev18031274m|PAC4GC:7325226|epdr1.L	DCYPVQETYTKN#DSMTTSTR	DCYPVQETYTKN(1)DSMTTSTR	8225100	0.00229581
gnl|Xelaev18031363m|PAC4GC:7325515|LOC733507.L	LLQYN#KSVYK	LLQYN(1)KSVYK	35870000	0.0100121
gnl|Xelaev18031616m|PAC4GC:7326494|ssr1.L	YPQDYQFYIQN#FTALPLNTVVPPQK	YPQDYQFYIQN(1)FTALPLNTVVPPQK	891010000	0.248701
gnl|Xelaev18031616m|PAC4GC:7326494|ssr1.L	DANGNAFQDAVFN#QTVTIIEK	DANGNAFQDAVFN(1)QTVTIIEK	38287000	0.0106867
gnl|Xelaev18031777m|PAC4GC:7325856|darmin.L	ILVPGIYEAVAPVGEN#ETDLYK	ILVPGIYEAVAPVGEN(1)ETDLYK	4917800000	1.37267
gnl|Xelaev18031856m|PAC4GC:7325272|lama1.L	ISEAMN#SSLLDIR	ISEAMN(1)SSLLDIR	108310000	0.0302317
gnl|Xelaev18031856m|PAC4GC:7325272|lama1.L	QDHFDGPHQISVN#NSEAR	QDHFDGPHQISVN(0.908)NSEAR	79933000	0.0223111
gnl|Xelaev18031856m|PAC4GC:7325272|lama1.L	FNEEVLN#TTSELSK	FNEEVLN(1)TTSELSK	48049000	0.0134115
gnl|Xelaev18031856m|PAC4GC:7325272|lama1.L	QLLALTMLPN#DTSEK	QLLALTMLPN(1)DTSEK	33791000	0.00943181
gnl|Xelaev18031856m|PAC4GC:7325272|lama1.L	QGNLMIMDSYN#SSTR	QGNLMIMDSYN(1)SSTR	31255000	0.00872396
gnl|Xelaev18031893m|PAC4GC:7324888|colec12.L	DRVQNLQNIAAN#NTAFVK	DRVQNLQNIAAN(0.99)NTAFVK	226650000	0.063263
gnl|Xelaev18031893m|PAC4GC:7324888|colec12.L	HTDDLVNLN#NSLGNMQIDTTSLR	HTDDLVNLN(0.999)NSLGNMQIDTTSLR	119470000	0.0333467
gnl|Xelaev18031912m|PAC4GC:7325345|npc1.L	YLHTGPPVYFVVEEGHN#YTTK	YLHTGPPVYFVVEEGHN(1)YTTK	993140000	0.277207
gnl|Xelaev18031912m|PAC4GC:7325345|npc1.L	MIAQN#ITDNMDIPEKK	MIAQN(1)ITDNMDIPEKK	864430000	0.241282
gnl|Xelaev18031912m|PAC4GC:7325345|npc1.L	FANAMYN#ACMNVEAPSSNVK	FANAMYN(1)ACMNVEAPSSNVK	208240000	0.0581244
gnl|Xelaev18031912m|PAC4GC:7325345|npc1.L	QSEFLN#VTNTEPYVDPSPQR	QSEFLN(1)VTNTEPYVDPSPQR	142350000	0.039733
gnl|Xelaev18031912m|PAC4GC:7325345|npc1.L	AYYNN#ETVMLK	AYYNN(1)ETVMLK	109500000	0.0305639
gnl|Xelaev18031912m|PAC4GC:7325345|npc1.L	AN#ESIVAMEYYIGER	AN(1)ESIVAMEYYIGER	85820000	0.0239543
gnl|Xelaev18031912m|PAC4GC:7325345|npc1.L	FVEN#YSNPN#LSISFSAER	FVEN(1)YSNPN(0.998)LSISFSAER	68594000	0.0191461
gnl|Xelaev18031912m|PAC4GC:7325345|npc1.L	N#STDFIDAMR	N(1)STDFIDAMR	8057400	0.002249
gnl|Xelaev18031914m|PAC4GC:7325903|lama3.L	INSLMPLAN#ISESVSR	INSLMPLAN(1)ISESVSR	9507700	0.00265381
gnl|Xelaev18031953m|PAC4GC:7324812|cdh2.L	IGSLDYGIYNIPIQITDSGNPAMSN#TSYLR	IGSLDYGIYNIPIQITDSGNPAMSN(0.999)TSYLR	52823000	0.0147441
gnl|Xelaev18031953m|PAC4GC:7324812|cdh2.L	VDVVVAN#LTVTDKDQPHTPAWNAVYR	VDVVVAN(1)LTVTDKDQPHTPAWNAVYR	28074000	0.00783607
gnl|Xelaev18031957m|PAC4GC:7325993|dsg2.L	LN#ATDADDPNTVNAK	LN(1)ATDADDPNTVNAK	211010000	0.0588976
gnl|Xelaev18031957m|PAC4GC:7325993|dsg2.L	LPDRESIYVVN#GSYVAK	LPDRESIYVVN(1)GSYVAK	121420000	0.033891
gnl|Xelaev18031970m|PAC4GC:7325525|mep1b.L	VGTSTTFPN#GTEYFR	VGTSTTFPN(1)GTEYFR	17014000	0.00474898
gnl|Xelaev18031970m|PAC4GC:7325525|mep1b.L	EYTEASPN#GTLTFITSIK	EYTEASPN(1)GTLTFITSIK	9267600	0.00258679
gnl|Xelaev18032055m|PAC4GC:7326001|Xetrov90016849m.L	YN#LSEALQGK	YN(1)LSEALQGK	6084400	0.00169829
gnl|Xelaev18032062m|PAC4GC:7325774|ggh.L	KASN#ISHSSEAVR	KASN(1)ISHSSEAVR	36347000	0.0101453
gnl|Xelaev18032197m|PAC4GC:7326201|cdh17.L	IN#VTENIWVAPPPQTIK	IN(1)VTENIWVAPPPQTIK	306430000	0.0855314
gnl|Xelaev18032197m|PAC4GC:7326201|cdh17.L	INVTENIWVAPPPQTIKEN#STEPHPMK	INVTENIWVAPPPQTIKEN(1)STEPHPMK	144560000	0.0403499
gnl|Xelaev18032197m|PAC4GC:7326201|cdh17.L	KVN#STFTLDGETDGVIEVDPHDGWLK	KVN(1)STFTLDGETDGVIEVDPHDGWLK	9340500	0.00260714
gnl|Xelaev18032197m|PAC4GC:7326201|cdh17.L	YFQINNSTGGISVTLN#GSQLITAGK	YFQINNSTGGISVTLN(1)GSQLITAGK	3067100	0.000856095
gnl|Xelaev18032295m|PAC4GC:7325995|Xelaev18032295m	VFSVSDPAN#VTYDGK	VFSVSDPAN(1)VTYDGK	436310000	0.121784
gnl|Xelaev18032295m|PAC4GC:7325995|Xelaev18032295m	VQYAN#STHIICVTGAQSPSQHTK	VQYAN(1)STHIICVTGAQSPSQHTK	224010000	0.0625261
gnl|Xelaev18032295m|PAC4GC:7325995|Xelaev18032295m	FALLPHIDSVTPNN#GSTTGFTR	FALLPHIDSVTPNN(1)GSTTGFTR	206500000	0.0576387
gnl|Xelaev18032295m|PAC4GC:7325995|Xelaev18032295m	QTITLQN#WSR	QTITLQN(1)WSR	99366000	0.0277352
gnl|Xelaev18032295m|PAC4GC:7325995|Xelaev18032295m	GDLWPN#GTVININR	GDLWPN(1)GTVININR	30869000	0.00861622
gnl|Xelaev18032295m|PAC4GC:7325995|Xelaev18032295m	ISESVFVDNGMGIFNIIYTPAATSHELSN#K.T	ISESVFVDNGMGIFNIIYTPAATSHELSN(1)K.T	8764300	0.00244631
gnl|Xelaev18032321m|PAC4GC:7326086|mal2.L	KGN#TTVINLDNR	KGN(1)TTVINLDNR	18528000	0.00517157
gnl|Xelaev18032332m|PAC4GC:7326642|col14a1.L	QVGEKPINAAGN#ITTDGLEVLGR	QVGEKPINAAGN(1)ITTDGLEVLGR	822920000	0.229695
gnl|Xelaev18032372m|PAC4GC:7326327|oc90.L	RIDVVHQPQLQQN#R.S	RIDVVHQPQLQQN(1)R.S	181080000	0.0505434
gnl|Xelaev18032388m|PAC4GC:7326559|st3gal1.L	VTGVHDGDFEASILAN#LTSINK	VTGVHDGDFEASILAN(1)LTSINK	81691000	0.0228018
gnl|Xelaev18032388m|PAC4GC:7326559|st3gal1.L	LN#LSISPLLTK	LN(1)LSISPLLTK	57745000	0.0161179
gnl|Xelaev18032388m|PAC4GC:7326559|st3gal1.L	DLQAN#VSMILIPFK	DLQAN(1)VSMILIPFK	25176000	0.00702718
gnl|Xelaev18032482m|PAC4GC:7326010|gpaa1.L	DLIFLVNEHDLIGMEAWLEGYHDVN#VTEIK	DLIFLVNEHDLIGMEAWLEGYHDVN(1)VTEIK	2681300	0.00074841
gnl|Xelaev18032495m|PAC4GC:7326255|LOC100498546.L	VIFQGTIN#GSSR	VIFQGTIN(1)GSSR	15995000	0.00446456
gnl|Xelaev18032676m|PAC4GC:7333546|Xelaev18032676m	KNPVN#LTEAPDKQDNNK	KNPVN(1)LTEAPDKQDNNK	11447000	0.00319511
gnl|Xelaev18032728m|PAC4GC:7334142|scap.S	YN#ATFLDSLR	YN(1)ATFLDSLR	2121000	0.000592018
gnl|Xelaev18032746m|PAC4GC:7333411|ngfr.S	GEN#GTTAGSPHFIPPADNSK	GEN(1)GTTAGSPHFIPPADNSK	135660000	0.0378657
gnl|Xelaev18032868m|PAC4GC:7334161|itgb1.S	NVLN#LTK	NVLN(1)LTK	3714800000	1.03688
gnl|Xelaev18032868m|PAC4GC:7334161|itgb1.S	MDPAN#ITQLRPQQLVFELR	MDPAN(1)ITQLRPQQLVFELR	161080000	0.044961
gnl|Xelaev18032868m|PAC4GC:7334161|itgb1.S	GTPNSPECHFGN#GTFECGACR	GTPNSPECHFGN(1)GTFECGACR	59784000	0.016687
gnl|Xelaev18032868m|PAC4GC:7334161|itgb1.S	LLNPCTNDQN#CTSPFSYK	LLNPCTNDQN(1)CTSPFSYK	46325000	0.0129303
gnl|Xelaev18032924m|PAC4GC:7333948|mrc1.S	YREPFWIGLNSN#K.T	YREPFWIGLNSN(0.997)K.T	35725000	0.00997164
gnl|Xelaev18032939m|PAC4GC:7334723|Xelaev18032939m	LIFSNEEDN#QTTQGLLSTR	LIFSNEEDN(0.996)QTTQGLLSTR	2854200	0.00079667
gnl|Xelaev18032945m|PAC4GC:7334519|fam171a1.S	ALNLPGN#ATYK	ALNLPGN(1)ATYK	14726000	0.00411035
gnl|Xelaev18032977m|PAC4GC:7333527|casd1.S	IDAYNDIAAGILN#GTTR	IDAYNDIAAGILN(1)GTTR	14811000	0.00413408
gnl|Xelaev18032978m|PAC4GC:7333746|sgce.S	LNAIN#ITSALDR	LNAIN(1)ITSALDR	6808700	0.00190046
gnl|Xelaev18033018m|PAC4GC:7334432|tspan13.S	QLLEVGWN#HTNGAHTDIER	QLLEVGWN(1)HTNGAHTDIER	10013000	0.00279485
gnl|Xelaev18033141m|PAC4GC:7334692|stt3b.S	AMSSN#ETAAYEIMK	AMSSN(1)ETAAYEIMK	488370000	0.136315
gnl|Xelaev18033141m|PAC4GC:7334692|stt3b.S	VMSWWDYGYQIAGMAN#R.T	VMSWWDYGYQIAGMAN(1)R.T	18317000	0.00511268
gnl|Xelaev18033163m|PAC4GC:7334571|pomgnt2.S	VN#ISSLIQVIK	VN(1)ISSLIQVIK	17223000	0.00480732
gnl|Xelaev18033179m|PAC4GC:7333504|col6a3.S	AHQGIQQIAVIMTNGQSMDN#VTKPAAK	AHQGIQQIAVIMTNGQSMDN(1)VTKPAAK	457630000	0.127735
gnl|Xelaev18033179m|PAC4GC:7333504|col6a3.S	FVEAVVN#DSLVGKK	FVEAVVN(1)DSLVGKK	144720000	0.0403946
gnl|Xelaev18033179m|PAC4GC:7333504|col6a3.S	FFYQLDDFDDSEN#VTELLLK	FFYQLDDFDDSEN(1)VTELLLK	21594000	0.00602736
gnl|Xelaev18033179m|PAC4GC:7333504|col6a3.S	KNAGVPQYLIVMTDGMSN#DSVEEDSAALR	KNAGVPQYLIVMTDGMSN(1)DSVEEDSAALR	18201000	0.0050803
gnl|Xelaev18033251m|PAC4GC:7334032|inhba.S	DRPN#ITQTVPK	DRPN(1)ITQTVPK	4601800	0.00128446
gnl|Xelaev18033345m|PAC4GC:7333425|slc39a6.S	YGENN#QTLTLSGFR	YGENN(0.996)QTLTLSGFR	114210000	0.0318785
gnl|Xelaev18033350m|PAC4GC:7333855|gabbr2.S	VGEYNAVADSLELIN#DTIR	VGEYNAVADSLELIN(1)DTIR	18179000	0.00507416
gnl|Xelaev18033350m|PAC4GC:7333855|gabbr2.S	IQDFN#YTDHK	IQDFN(1)YTDHK	8073000	0.00225335
gnl|Xelaev18033465m|PAC4GC:7334702|pign.S	ADTFFELVEN#GTSR	ADTFFELVEN(1)GTSR	22088000	0.00616525
gnl|Xelaev18033473m|PAC4GC:7333393|cdh6.S	IN#TTIGTVLAQDPDAVR	IN(1)TTIGTVLAQDPDAVR	53762000	0.0150062
gnl|Xelaev18033473m|PAC4GC:7333393|cdh6.S	ETQLWHN#ITVIATEMNNPK	ETQLWHN(1)ITVIATEMNNPK	6692200	0.00186794
gnl|Xelaev18033541m|PAC4GC:7333216|darmin.S	ILVPGIYEAVAALGEN#ETNLYK	ILVPGIYEAVAALGEN(0.989)ETNLYK	46311000	0.0129264
gnl|Xelaev18033564m|PAC4GC:7333654|tmx3.S	LVAVAVIDEKN#NSIEHTR	LVAVAVIDEKN(0.999)NSIEHTR	855990000	0.238926
gnl|Xelaev18033636m|PAC4GC:7333647|colec12.S	HTDDLVNLN#SSLSNMQTDTTFLR	HTDDLVNLN(1)SSLSNMQTDTTFLR	55472000	0.0154835
gnl|Xelaev18033676m|PAC4GC:7333743|dsc3.S	HQHN#VTIIGVDQSGK	HQHN(1)VTIIGVDQSGK	203700000	0.0568572
gnl|Xelaev18033676m|PAC4GC:7333743|dsc3.S	IN#DTAIYIR	IN(1)DTAIYIR	47099000	0.0131464
gnl|Xelaev18033679m|PAC4GC:7334651|dsg2.S	FIN#VTAVDRDDFPFGAPFK	FIN(1)VTAVDRDDFPFGAPFK	77302000	0.0215767
gnl|Xelaev18033679m|PAC4GC:7334651|dsg2.S	LN#ATDADDPNTINAK	LN(1)ATDADDPNTINAK	43639000	0.0121806
gnl|Xelaev18033679m|PAC4GC:7334651|dsg2.S	IPDRESIYVVN#GTYVVK	IPDRESIYVVN(1)GTYVVK	9786300	0.00273157
gnl|Xelaev18033783m|PAC4GC:7334567|sulf1.S	YLNEYN#GSYIPPGWR	YLNEYN(1)GSYIPPGWR	5855800	0.00163448
gnl|Xelaev18033971m|PAC4GC:7334352|mal2.S	KEN#ATVINLDNR	KEN(1)ATVINLDNR	75260000	0.0210067
gnl|Xelaev18033978m|PAC4GC:7334350|col14a1.S	QVAEKPINAAGN#ITTDGLEVLGR	QVAEKPINAAGN(1)ITTDGLEVLGR	177480000	0.0495386
gnl|Xelaev18034013m|PAC4GC:7333619|oc90.S	AAAECMAAAPYN#ETAR	AAAECMAAAPYN(1)ETAR	214340000	0.059827
gnl|Xelaev18034013m|PAC4GC:7333619|oc90.S	RIDIVHQPQLQQN#R.S	RIDIVHQPQLQQN(1)R.S	175000000	0.0488464
gnl|Xelaev18034013m|PAC4GC:7333619|oc90.S	ELNN#FTFNGVFK	ELNN(1)FTFNGVFK	130050000	0.0362998
gnl|Xelaev18034013m|PAC4GC:7333619|oc90.S	LCDCDKEAIECFVNSHIN#SSVK	LCDCDKEAIECFVNSHIN(0.99)SSVK	7422800	0.00207187
gnl|Xelaev18034034m|PAC4GC:7333289|st3gal1.S	DLHVN#VSMILIPFK	DLHVN(1)VSMILIPFK	7885500	0.00220102
gnl|Xelaev18034230m|PAC4GC:7367980|habp2.L	GATSQLLEATVQLISEAN#CSQSK	GATSQLLEATVQLISEAN(1)CSQSK	3423600	0.000955602
gnl|Xelaev18034260m|PAC4GC:7367743|Xelaev18034260m	NAIQAFGN#GTDVR	NAIQAFGN(1)GTDVR	174280000	0.0486454
gnl|Xelaev18034261m|PAC4GC:7367586|Xelaev18034261m	VIGLEAKDECKN#VTEALK	VIGLEAKDECKN(1)VTEALK	11723000	0.00327215
gnl|Xelaev18034311m|PAC4GC:7367982|pzp.L	ASNLGEVN#VTVK	ASNLGEVN(1)VTVK	1542800000	0.43063
gnl|Xelaev18034311m|PAC4GC:7367982|pzp.L	HPVYLIDTDGIVN#MTLMTDK	HPVYLIDTDGIVN(1)MTLMTDK	96652000	0.0269777
gnl|Xelaev18034320m|PAC4GC:7366739|pzp-like.2.L	FTPIIYISEYLN#K.T	FTPIIYISEYLN(1)K.T	113440000	0.0316636
gnl|Xelaev18034320m|PAC4GC:7366739|pzp-like.2.L	GGIAGHGKNEVEISPNQN#ASGTFK	GGIAGHGKNEVEISPNQN(0.993)ASGTFK	109640000	0.0306029
gnl|Xelaev18034320m|PAC4GC:7366739|pzp-like.2.L	QN#HTLLEK	QN(1)HTLLEK	60704000	0.0169438
gnl|Xelaev18034322m|PAC4GC:7366409|ovos2.L	KN#FSETFLWR	KN(1)FSETFLWR	30791000	0.00859445
gnl|Xelaev18034322m|PAC4GC:7366409|ovos2.L	DVHLN#QSK	DVHLN(1)QSK	2545600	0.000710533
gnl|Xelaev18034325m|PAC4GC:7367760|Xelaev18034325m	LAGNFLQN#LTTDSAGK	LAGNFLQN(1)LTTDSAGK	63519000	0.0177296
gnl|Xelaev18034366m|PAC4GC:7367310|lipa.L	GNMIHYN#QTTPPFYNVK	GNMIHYN(0.997)QTTPPFYNVK	368090000	0.102742
gnl|Xelaev18034366m|PAC4GC:7367310|lipa.L	QGFASDLLYSADPEAFMN#ISELIR	QGFASDLLYSADPEAFMN(1)ISELIR	5781300	0.00161369
gnl|Xelaev18034645m|PAC4GC:7366576|sema4g.L	VSN#YSTLLLEDER	VSN(1)YSTLLLEDER	27984000	0.00781095
gnl|Xelaev18034645m|PAC4GC:7366576|sema4g.L	NGFN#TSQDLPNNVLDFVK	NGFN(1)TSQDLPNNVLDFVK	7223300	0.00201618
gnl|Xelaev18034674m|PAC4GC:7367194|Xetrov90017730m.L	NLN#ITQYTDEVQK	NLN(1)ITQYTDEVQK	221550000	0.0618395
gnl|Xelaev18034674m|PAC4GC:7367194|Xetrov90017730m.L	KIDNTN#ITIK	KIDNTN(0.986)ITIK	199930000	0.0558049
gnl|Xelaev18034674m|PAC4GC:7367194|Xetrov90017730m.L	NVN#ISTLYR	NVN(1)ISTLYR	136410000	0.038075
gnl|Xelaev18034674m|PAC4GC:7367194|Xetrov90017730m.L	VAN#STLDSIVNTVNAVN#DTAK	VAN(1)STLDSIVNTVNAVN(0.993)DTAK	96798000	0.0270185
gnl|Xelaev18034674m|PAC4GC:7367194|Xetrov90017730m.L	FVDTQASGVVKN#ATTAYATK	FVDTQASGVVKN(1)ATTAYATK	80622000	0.0225034
gnl|Xelaev18034674m|PAC4GC:7367194|Xetrov90017730m.L	MEFAN#ITTPNYKPEADPENGVYK	MEFAN(1)ITTPNYKPEADPENGVYK	58110000	0.0162198
gnl|Xelaev18034674m|PAC4GC:7367194|Xetrov90017730m.L	KAINDIPQTVKN#ETK	KAINDIPQTVKN(1)ETK	46254000	0.0129105
gnl|Xelaev18034674m|PAC4GC:7367194|Xetrov90017730m.L	EQIKN#VSTSGINTLN#FTDFNSSLGR	EQIKN(1)VSTSGINTLN(0.999)FTDFNSSLGR	35358000	0.0098692
gnl|Xelaev18034674m|PAC4GC:7367194|Xetrov90017730m.L	EQIKNVSTSGINTLN#FTDFN#SSLGR	EQIKNVSTSGINTLN(0.992)FTDFN(1)SSLGR	18835000	0.00525726
gnl|Xelaev18034674m|PAC4GC:7367194|Xetrov90017730m.L	LLVATN#DSFNALLAEQEIIR	LLVATN(1)DSFNALLAEQEIIR	12583000	0.00351219
gnl|Xelaev18034680m|PAC4GC:7367103|slit1.L	VSCVHN#DSFTGLR	VSCVHN(1)DSFTGLR	69960000	0.0195274
gnl|Xelaev18034680m|PAC4GC:7367103|slit1.L	N#VTELYLDGNQFTMVPGQLSSFK	N(1)VTELYLDGNQFTMVPGQLSSFK	3166100	0.000883728
gnl|Xelaev18034729m|PAC4GC:7366382|entpd1.L	LNN#ATMAEEVLSSVENMLR	LNN(0.914)ATMAEEVLSSVENMLR	22194000	0.00619484
gnl|Xelaev18034729m|PAC4GC:7366382|entpd1.L	N#TSTSDLYSSPCISNLR	N(1)TSTSDLYSSPCISNLR	9441700	0.00263539
gnl|Xelaev18034809m|PAC4GC:7366275|tm9sf3.L	IVDVN#LTSEGKVK	IVDVN(1)LTSEGKVK	4217400000	1.17717
gnl|Xelaev18034811m|PAC4GC:7367499|tll2.L	IILN#FTTMDLFK	IILN(1)FTTMDLFK	2787900	0.000778165
gnl|Xelaev18034880m|PAC4GC:7367894|elovl3.L	GELDGHN#LSVILLQEYDFERR	GELDGHN(1)LSVILLQEYDFERR	29216000	0.00815483
gnl|Xelaev18034893m|PAC4GC:7367544|ndst2.L	AHNDPVAMN#YTFAQVVSAGPHAPLELR	AHNDPVAMN(0.985)YTFAQVVSAGPHAPLELR	9798800	0.00273506
gnl|Xelaev18034893m|PAC4GC:7367544|ndst2.L	FLGVTPHYN#YTQALK	FLGVTPHYN(1)YTQALK	4510700	0.00125904
gnl|Xelaev18034910m|PAC4GC:7367992|psap.L	YVDELLEKN#ATEIR	YVDELLEKN(1)ATEIR	5203400000	1.45238
gnl|Xelaev18034910m|PAC4GC:7367992|psap.L	EVVTVLGNYLKDN#ITQDEIK	EVVTVLGNYLKDN(1)ITQDEIK	3970900000	1.10837
gnl|Xelaev18034917m|PAC4GC:7366604|unc5b.L	LSDTAN#YTCVSK	LSDTAN(1)YTCVSK	8966800	0.00250283
gnl|Xelaev18034924m|PAC4GC:7367859|mttp.2.L	YGFQTDNSVFGVSLN#STSK	YGFQTDNSVFGVSLN(1)STSK	20100000	0.00561035
gnl|Xelaev18034924m|PAC4GC:7367859|mttp.2.L	ETYVVSESLPEKN#ITYTK	ETYVVSESLPEKN(1)ITYTK	14419000	0.00402466
gnl|Xelaev18034946m|PAC4GC:7367303|mmrn2.L	IFSNYETLIATN#TTLNVAK	IFSNYETLIATN(0.992)TTLNVAK	15367000	0.00428927
gnl|Xelaev18034946m|PAC4GC:7367303|mmrn2.L	EQFNPMWDSFN#K.S	EQFNPMWDSFN(0.998)K.S	4154000	0.00115947
gnl|Xelaev18034980m|PAC4GC:7367034|LOC100496372.L	AVDFHAEN#ITESLTEK	AVDFHAEN(1)ITESLTEK	14697000	0.00410226
gnl|Xelaev18034983m|PAC4GC:7367712|fam213a.L	EKEFGDKAN#LTAVLDAAR	EKEFGDKAN(1)LTAVLDAAR	219550000	0.0612813
gnl|Xelaev18035107m|PAC4GC:7367601|ssh3.L	ESDLEN#ITSKEVR	ESDLEN(1)ITSKEVR	10196000	0.00284593
gnl|Xelaev18035194m|PAC4GC:7366078|angptl7.L	LFLGN#YSGNAGR	LFLGN(1)YSGNAGR	184640000	0.0515371
gnl|Xelaev18035194m|PAC4GC:7366078|angptl7.L	VQISN#LSSLLGELSK	VQISN(1)LSSLLGELSK	45315000	0.0126484
gnl|Xelaev18035194m|PAC4GC:7366078|angptl7.L	YHN#NTAFSTK	YHN(0.986)NTAFSTK	20060000	0.00559919
gnl|Xelaev18035200m|PAC4GC:7367421|plod1.L	GKVN#ITLDHR	GKVN(1)ITLDHR	356250000	0.0994372
gnl|Xelaev18035200m|PAC4GC:7367421|plod1.L	YIHPN#YSEALK	YIHPN(1)YSEALK	59133000	0.0165053
gnl|Xelaev18035215m|PAC4GC:7367190|clmp.L	HSLGHLGTQSLDIEWLSN#ISDYGK	HSLGHLGTQSLDIEWLSN(1)ISDYGK	2618100	0.00073077
gnl|Xelaev18035255m|PAC4GC:7367127|st14.L	LYTGYLTIANTPFIDAYEN#STTAEFSDLSAK	LYTGYLTIANTPFIDAYEN(1)STTAEFSDLSAK	92264000	0.0257529
gnl|Xelaev18035255m|PAC4GC:7367127|st14.L	IIN#QTECNK	IIN(1)QTECNK	32292000	0.00901341
gnl|Xelaev18035290m|PAC4GC:7367556|siae.L	ESYVN#ITYDQK	ESYVN(1)ITYDQK	400840000	0.111883
gnl|Xelaev18035292m|PAC4GC:7368120|cdon.L	YLILPSGNLHILN#VSVEDR	YLILPSGNLHILN(1)VSVEDR	14751000	0.00411733
gnl|Xelaev18035325m|PAC4GC:7368191|LOC101732086.L	NQGFDNILYTGN#FTSATEYVNR	NQGFDNILYTGN(0.999)FTSATEYVNR	2280900	0.00063665
gnl|Xelaev18035364m|PAC4GC:7366389|sorl1.L	MGHN#YTFIVQAK	MGHN(1)YTFIVQAK	60933000	0.0170077
gnl|Xelaev18035382m|PAC4GC:7366755|pvrl1-like.2.L	NDN#GTVTVISR	NDN(1)GTVTVISR	204000000	0.0569409
gnl|Xelaev18035382m|PAC4GC:7366755|pvrl1-like.2.L	ESQLN#LTVLSKPVNHMEGTSNQLIAVPGSTK	ESQLN(0.98)LTVLSKPVNHMEGTSNQLIAVPGSTK	55277000	0.015429
gnl|Xelaev18035382m|PAC4GC:7366755|pvrl1-like.2.L	MAN#GSLPDNAVVNNNTLHFR	MAN(1)GSLPDNAVVNNNTLHFR	34538000	0.00964032
gnl|Xelaev18035385m|PAC4GC:7366838|thy1.L	YQN#ITNNPMR	YQN(1)ITNNPMR	15362000	0.00428787
gnl|Xelaev18035391m|PAC4GC:7368307|mcam.L	YTCAISLPSVPGLN#VSK	YTCAISLPSVPGLN(1)VSK	19318000	0.00539208
gnl|Xelaev18035420m|PAC4GC:7367249|treh.L	LIAFVN#SSFSPPGQEFEPWSPSDWK	LIAFVN(1)SSFSPPGQEFEPWSPSDWK	1802400	0.00050309
gnl|Xelaev18035426m|PAC4GC:7367207|hyou1.L	VFGSLN#LTTVK	VFGSLN(1)LTTVK	2992600000	0.835301
gnl|Xelaev18035426m|PAC4GC:7367207|hyou1.L	LAALDSLLN#HSSIFLK	LAALDSLLN(1)HSSIFLK	1830900000	0.511045
gnl|Xelaev18035426m|PAC4GC:7367207|hyou1.L	LITDTWTWKN#ETLAEQAK	LITDTWTWKN(1)ETLAEQAK	560820000	0.156537
gnl|Xelaev18035426m|PAC4GC:7367207|hyou1.L	LSEDLIYSPEELLGMILN#YSR	LSEDLIYSPEELLGMILN(1)YSR	242730000	0.0677513
gnl|Xelaev18035426m|PAC4GC:7367207|hyou1.L	DIN#ATAQNIMFYDMGAR	DIN(1)ATAQNIMFYDMGAR	130840000	0.0365203
gnl|Xelaev18035426m|PAC4GC:7367207|hyou1.L	IIPPKEESTQEN#ASNPEPVK	IIPPKEESTQEN(0.994)ASNPEPVK	48295000	0.0134802
gnl|Xelaev18035439m|PAC4GC:7366080|scn4b.L	GATHN#ATIILK	GATHN(1)ATIILK	69542000	0.0194107
gnl|Xelaev18035451m|PAC4GC:7366805|pcsk7.L	NPGMDIN#VTGVWER	NPGMDIN(0.999)VTGVWER	19786000	0.00552271
gnl|Xelaev18035475m|PAC4GC:7366475|cadm1.L	VSLSN#VTLEDEGR	VSLSN(1)VTLEDEGR	931140000	0.259902
gnl|Xelaev18035475m|PAC4GC:7366475|cadm1.L	FQLVN#FSSNELR	FQLVN(1)FSSNELR	413720000	0.115478
gnl|Xelaev18035475m|PAC4GC:7366475|cadm1.L	VEEDLPEHVLILGDNLLFGNLN#K.T	VEEDLPEHVLILGDNLLFGNLN(0.992)K.T	61515000	0.0171702
gnl|Xelaev18035475m|PAC4GC:7366475|cadm1.L	VEEDLPEHVLILGDNLLFGNLNKTDN#GTYR	VEEDLPEHVLILGDNLLFGNLN(0.829)KTDN(1)GTYR	30815000	0.00860115
gnl|Xelaev18035536m|PAC4GC:7366982|htr3a.L	EFEN#VSQISIPTEK	EFEN(1)VSQISIPTEK	32613000	0.00910301
gnl|Xelaev18035552m|PAC4GC:7367511|ncam1.L	DGQLLPSSN#FSNIK	DGQLLPSSN(0.961)FSNIK	972090000	0.271332
gnl|Xelaev18035552m|PAC4GC:7367511|ncam1.L	NDEYTSTLTIYN#VSSQDAGIYK	NDEYTSTLTIYN(1)VSSQDAGIYK	89945000	0.0251056
gnl|Xelaev18035569m|PAC4GC:7368320|Xelaev18035569m	NELMLN#SSLMR	NELMLN(1)SSLMR	92017000	0.025684
gnl|Xelaev18035589m|PAC4GC:7368039|h6pd.L	DVIQNHLTEILTSLSMEVPLN#YSK	DVIQNHLTEILTSLSMEVPLN(1)YSK	454480000	0.126855
gnl|Xelaev18035607m|PAC4GC:7366216|ski.L	N#LSNTNKNTGYVHPR	N(0.993)LSNTNKNTGYVHPR	16838000	0.00469986
gnl|Xelaev18035689m|PAC4GC:7367559|p3h1.L	VPLNSALLYYN#VTDKVR	VPLNSALLYYN(1)VTDKVR	945860000	0.26401
gnl|Xelaev18035689m|PAC4GC:7367559|p3h1.L	LHCAN#HTGGFSDLPLNWGPVQDLTFFQR	LHCAN(0.947)HTGGFSDLPLNWGPVQDLTFFQR	19167000	0.00534993
gnl|Xelaev18035915m|PAC4GC:7367816|cd37.L	LGTIVESVIKDYGLYGN#QTDLEEGWDFAQEK	LGTIVESVIKDYGLYGN(1)QTDLEEGWDFAQEK	39862000	0.0111264
gnl|Xelaev18036003m|PAC4GC:7367874|LOC101730343-like.L	GHMYFTEAEGLAN#GSLLIK	GHMYFTEAEGLAN(1)GSLLIK	2720600	0.00075938
gnl|Xelaev18036015m|PAC4GC:7366619|LOC100493733.L	FSHDN#SSMTIPR	FSHDN(1)SSMTIPR	4937300	0.00137811
gnl|Xelaev18036020m|PAC4GC:7366636|bcam.L	AFN#LTLHFYTEDVKFELLSATPIKEGDDVK	AFN(1)LTLHFYTEDVKFELLSATPIKEGDDVK	45315000	0.0126484
gnl|Xelaev18036021m|PAC4GC:7366040|pvrl2.L	VN#TTIVCEVTNALGSR	VN(1)TTIVCEVTNALGSR	8757600	0.00244444
gnl|Xelaev18036044m|PAC4GC:7367247|rcn3.L	N#TSYGYIPGEEFYDVADKDKER	N(1)TSYGYIPGEEFYDVADKDKER	219230000	0.0611919
gnl|Xelaev18036072m|PAC4GC:7367987|napsa.L	DPMATVGGELILGGTDPNYYTGDFHYLN#VTR	DPMATVGGELILGGTDPNYYTGDFHYLN(1)VTR	7475900	0.00208669
gnl|Xelaev18036111m|PAC4GC:7367494|Xelaev18036111m	GQYLSFN#NTNK	GQYLSFN(1)NTNK	4764300000	1.32982
gnl|Xelaev18036111m|PAC4GC:7367494|Xelaev18036111m	IGEN#ITFSNGQSCACER	IGEN(1)ITFSNGQSCACER	1187100000	0.331346
gnl|Xelaev18036111m|PAC4GC:7367494|Xelaev18036111m	N#GSTLVSVK	N(1)GSTLVSVK	94981000	0.0265113
gnl|Xelaev18036133m|PAC4GC:7368107|ptprh.L	ATTKPSPVQN#VTITGR	ATTKPSPVQN(1)VTITGR	59989000	0.0167443
gnl|Xelaev18036133m|PAC4GC:7368107|ptprh.L	N#VTVTNLQPAR	N(1)VTVTNLQPAR	10182000	0.00284202
gnl|Xelaev18036177m|PAC4GC:7366328|cacng6.L	ATCGPAELPGESN#CSYFK	ATCGPAELPGESN(1)CSYFK	8099400	0.00226072
gnl|Xelaev18036216m|PAC4GC:7367492|loc100492168.L	ENVN#QTVCQGSSWTR	ENVN(1)QTVCQGSSWTR	6985100	0.0019497
gnl|Xelaev18036315m|PAC4GC:7366230|iglon5.L	LGSFN#SSLR	LGSFN(1)SSLR	174530000	0.0487152
gnl|Xelaev18036315m|PAC4GC:7366230|iglon5.L	HYGN#YTCLASNK	HYGN(1)YTCLASNK	44248000	0.0123506
gnl|Xelaev18036350m|PAC4GC:7367612|alpl.L	EN#VSTVDFSHPNYLAQSAVPLR	EN(1)VSTVDFSHPNYLAQSAVPLR	791500000	0.220925
gnl|Xelaev18036350m|PAC4GC:7367612|alpl.L	LVNGQREN#VSTVDFSHPNYLAQSAVPLR	LVNGQREN(1)VSTVDFSHPNYLAQSAVPLR	387880000	0.108266
gnl|Xelaev18036350m|PAC4GC:7367612|alpl.L	LDGLN#LTQIWLDQKPNKK	LDGLN(1)LTQIWLDQKPNKK	198990000	0.0555425
gnl|Xelaev18036350m|PAC4GC:7367612|alpl.L	KYMFPKN#TSDVEYPNDDK	KYMFPKN(1)TSDVEYPNDDK	44178000	0.0123311
gnl|Xelaev18036350m|PAC4GC:7367612|alpl.L	N#TTMDPSLSEMVEAAIK	N(1)TTMDPSLSEMVEAAIK	39846000	0.0111219
gnl|Xelaev18036351m|PAC4GC:7366086|ece1.L	LAN#ITIPQEKR	LAN(1)ITIPQEKR	413910000	0.115531
gnl|Xelaev18036351m|PAC4GC:7366086|ece1.L	EYLVEVSSLIN#STDKR	EYLVEVSSLIN(1)STDKR	361300000	0.100847
gnl|Xelaev18036351m|PAC4GC:7366086|ece1.L	HLLEN#STMN#TSSTAEHK	HLLEN(1)STMN(1)TSSTAEHK	337260000	0.0941367
gnl|Xelaev18036351m|PAC4GC:7366086|ece1.L	AQSYFQACMN#ESKIEELGAKPLQDLIQK	AQSYFQACMN(1)ESKIEELGAKPLQDLIQK	73090000	0.020401
gnl|Xelaev18036351m|PAC4GC:7366086|ece1.L	QTECITEQYGN#YTVNGEAVNGK	QTECITEQYGN(1)YTVNGEAVNGK	22018000	0.00614571
gnl|Xelaev18036351m|PAC4GC:7366086|ece1.L	NSNSNVIQIDQSGLGLPSMEYYLN#K.T	NSNSNVIQIDQSGLGLPSMEYYLN(1)K.T	5660900	0.00158008
gnl|Xelaev18036358m|PAC4GC:7366690|hspg2.L	LRAPLPWQHEVVN#DTLIIPK	LRAPLPWQHEVVN(1)DTLIIPK	27456000	0.00766358
gnl|Xelaev18036358m|PAC4GC:7366690|hspg2.L	HNQPMEDNVHISPN#GSIITIVGAHHK	HNQPMEDNVHISPN(0.94)GSIITIVGAHHK	13324000	0.00371902
gnl|Xelaev18036392m|PAC4GC:7366660|clcnkb.L	ELLTSLFDN#R.T	ELLTSLFDN(1)R.T	3660300	0.00102167
gnl|Xelaev18036473m|PAC4GC:7367974|aplp1.L	VN#QSLSLLYR	VN(1)QSLSLLYR	34208000	0.00954821
gnl|Xelaev18036484m|PAC4GC:7367470|fcgbp.L	VVAYTTTVN#VTLCDLEIGITR	VVAYTTTVN(1)VTLCDLEIGITR	7656900	0.00213721
gnl|Xelaev18036509m|PAC4GC:7366152|loc100492852.L	VADLPGCSGGAPENCN#LTALVK	VADLPGCSGGAPENCN(1)LTALVK	671960000	0.187559
gnl|Xelaev18036509m|PAC4GC:7366152|loc100492852.L	ALTLQVYGQN#ITLTR	ALTLQVYGQN(1)ITLTR	540470000	0.150857
gnl|Xelaev18036509m|PAC4GC:7366152|loc100492852.L	YSQEDSCGLLN#NTINGPFR	YSQEDSCGLLN(1)NTINGPFR	404060000	0.112782
gnl|Xelaev18036509m|PAC4GC:7366152|loc100492852.L	GDLALAN#FSITVENEKNK	GDLALAN(1)FSITVENEKNK	189910000	0.0530081
gnl|Xelaev18036509m|PAC4GC:7366152|loc100492852.L	N#ATGCNLECQPNSVYK	N(1)ATGCNLECQPNSVYK	99020000	0.0276387
gnl|Xelaev18036509m|PAC4GC:7366152|loc100492852.L	FEFYGN#CSYILSK	FEFYGN(1)CSYILSK	50220000	0.0140175
gnl|Xelaev18036509m|PAC4GC:7366152|loc100492852.L	ENCGCFYQGHFVAPN#QTFWADTGCK	ENCGCFYQGHFVAPN(0.998)QTFWADTGCK	23875000	0.00666404
gnl|Xelaev18036509m|PAC4GC:7366152|loc100492852.L	AVSYITAVN#LTIYSMEIQMR	AVSYITAVN(1)LTIYSMEIQMR	4720400	0.00131757
gnl|Xelaev18036541m|PAC4GC:7366160|LOC101734126.L	ISLSN#VSVDDGGR	ISLSN(1)VSVDDGGR	12061000	0.00336649
gnl|Xelaev18036560m|PAC4GC:7367447|b4galt3.L	ELQPLYTN#ISVDIGTNK	ELQPLYTN(1)ISVDIGTNK	57333000	0.0160029
gnl|Xelaev18036568m|PAC4GC:7366542|Xelaev18036568m	FYN#ETIDYK	FYN(1)ETIDYK	630800000	0.17607
gnl|Xelaev18036684m|PAC4GC:7357531|Xelaev18036684m	IN#ITAEYTGSR	IN(1)ITAEYTGSR	827550000	0.230987
gnl|Xelaev18036713m|PAC4GC:7357329|p3h3.S	QALQMASSGSVN#SSQAQLFYQTSER	QALQMASSGSVN(1)SSQAQLFYQTSER	24119000	0.00673215
gnl|Xelaev18036732m|PAC4GC:7357394|scnn1a.S	YN#STGVQGWIPNNQR	YN(1)STGVQGWIPNNQR	9517400	0.00265652
gnl|Xelaev18036769m|PAC4GC:7356963|minpp1.S	FPQTPESGLKDLPGMEPVIN#DTLMR	FPQTPESGLKDLPGMEPVIN(1)DTLMR	175560000	0.0490027
gnl|Xelaev18036769m|PAC4GC:7356963|minpp1.S	FLVEVEDN#DTALHEVDKFK	FLVEVEDN(1)DTALHEVDKFK	55155000	0.015395
gnl|Xelaev18036922m|PAC4GC:7356092|LOC101730994.S	VYGQNINN#ETWSR	VYGQNINN(0.988)ETWSR	62188000	0.017358
gnl|Xelaev18036961m|PAC4GC:7356309|Xetrov90017730m.S	EFTN#ITTPNYK	EFTN(0.966)ITTPNYK	15246000	0.0042555
gnl|Xelaev18037047m|PAC4GC:7356650|entpd1.S	LNN#VTMAEEVLSSVENTLR	LNN(0.923)VTMAEEVLSSVENTLR	22352000	0.00623894
gnl|Xelaev18037093m|PAC4GC:7357427|p4ha1.S	DISDGFISN#LTIQR	DISDGFISN(1)LTIQR	1610200000	0.449442
gnl|Xelaev18037093m|PAC4GC:7357427|p4ha1.S	ESN#KSSSSLSEGEEVR	ESN(1)KSSSSLSEGEEVR	20376000	0.00568739
gnl|Xelaev18037137m|PAC4GC:7357220|elovl3.S	GEPDGHN#LSVILQEYDFER	GEPDGHN(1)LSVILQEYDFER	59022000	0.0164743
gnl|Xelaev18037163m|PAC4GC:7356922|chst3.S	LANDLETLTN#R.S	LANDLETLTN(1)R.S	57839000	0.0161441
gnl|Xelaev18037174m|PAC4GC:7356539|psap.S	YVDELLEKN#ATESR	YVDELLEKN(1)ATESR	3971300000	1.10848
gnl|Xelaev18037174m|PAC4GC:7356539|psap.S	DN#ITQGEIK	DN(1)ITQGEIK	1363900000	0.380695
gnl|Xelaev18037174m|PAC4GC:7356539|psap.S	EIITVLGNFMKDN#ITQGEIKDYLNK	EIITVLGNFMKDN(1)ITQGEIKDYLNK	284640000	0.0794493
gnl|Xelaev18037274m|PAC4GC:7356859|jam3.S	FQN#SSFTLDPK	FQN(1)SSFTLDPK	80822000	0.0225592
gnl|Xelaev18037284m|PAC4GC:7356677|clmp.S	IGPENQLLFHN#LSK	IGPENQLLFHN(1)LSK	13036000	0.00363864
gnl|Xelaev18037289m|PAC4GC:7356690|plod1.S	YIHHN#HSEALK	YIHHN(1)HSEALK	32186000	0.00898382
gnl|Xelaev18037289m|PAC4GC:7356690|plod1.S	GKIN#ITLDHR	GKIN(1)ITLDHR	28178000	0.0078651
gnl|Xelaev18037307m|PAC4GC:7356537|angptl7.S	AQISN#LSSLLGELSK	AQISN(1)LSSLLGELSK	13013000	0.00363222
gnl|Xelaev18037313m|PAC4GC:7356651|Xelaev18037313m	AEILISN#YSR	AEILISN(1)YSR	12910000	0.00360347
gnl|Xelaev18037313m|PAC4GC:7356651|Xelaev18037313m	LLQQGIISN#LTYF	LLQQGIISN(1)LTYF	9597500	0.00267887
gnl|Xelaev18037344m|PAC4GC:7357298|aplp2.S	MN#QSLSLLYK	MN(1)QSLSLLYK	49251000	0.013747
gnl|Xelaev18037352m|PAC4GC:7357001|stt3a.S	VMSWWDYGYQITAMAN#R	VMSWWDYGYQITAMAN(1)R	40683000	0.0113555
gnl|Xelaev18037374m|PAC4GC:7357540|cadm1.S	VDDDLPEHVLILGDNLLFGNLN#KTDN#GTYR	VDDDLPEHVLILGDNLLFGNLN(0.961)KTDN(0.999)GTYR	70417000	0.0196549
gnl|Xelaev18037414m|PAC4GC:7356195|pvrl1-like.2.S	NEN#GTVTVISR	NEN(1)GTVTVISR	103210000	0.0288082
gnl|Xelaev18037418m|PAC4GC:7357466|oaf.S	GTDTLQMDVAIN#FTK	GTDTLQMDVAIN(1)FTK	16113000	0.00449749
gnl|Xelaev18037482m|PAC4GC:7356547|h6pd.S	DVIQNHLTEILTSVSMEVPLN#YSK	DVIQNHLTEILTSVSMEVPLN(1)YSK	116010000	0.032381
gnl|Xelaev18037507m|PAC4GC:7357511|mxra8.S	VQLN#ITK	VQLN(1)ITK	11772000	0.00328583
gnl|Xelaev18037522m|PAC4GC:7357294|mmp23b.S	WDHYN#LTYR	WDHYN(1)LTYR	16557000	0.00462142
gnl|Xelaev18037749m|PAC4GC:7356861|ceacam8.S	DGAPVPPGLILSADN#R.T	DGAPVPPGLILSADN(1)R.T	11569000	0.00322916
gnl|Xelaev18037751m|PAC4GC:7357196|LOC101730343-like.S	GHMYFDQAEALAN#GSLLIK	GHMYFDQAEALAN(1)GSLLIK	28244000	0.00788352
gnl|Xelaev18037753m|PAC4GC:7357115|Xelaev18037753m	N#VTLSVSEINGMLK	N(1)VTLSVSEINGMLK	67703000	0.0188974
gnl|Xelaev18037832m|PAC4GC:7356664|otog.S	IGEN#ITFSNGQECACER	IGEN(1)ITFSNGQECACER	232770000	0.0649713
gnl|Xelaev18037872m|PAC4GC:7356285|tlr13.S	IGSAN#LSVIGR	IGSAN(1)LSVIGR	17454000	0.0048718
gnl|Xelaev18037944m|PAC4GC:7356321|ece1.S	FYN#FSAR	FYN(1)FSAR	1698400000	0.474061
gnl|Xelaev18037944m|PAC4GC:7356321|ece1.S	ELYLN#KTENEK	ELYLN(1)KTENEK	535450000	0.149456
gnl|Xelaev18037944m|PAC4GC:7356321|ece1.S	HLLEN#STMN#TSSSAER	HLLEN(1)STMN(1)TSSSAER	160120000	0.044693
gnl|Xelaev18037944m|PAC4GC:7356321|ece1.S	EYLVEISSLIN#STDKR	EYLVEISSLIN(1)STDKR	149420000	0.0417064
gnl|Xelaev18037944m|PAC4GC:7356321|ece1.S	YFQACMN#ETKIEELGAKPLQDLIQK	YFQACMN(1)ETKIEELGAKPLQDLIQK	134690000	0.037595
gnl|Xelaev18037944m|PAC4GC:7356321|ece1.S	EQMQEILDFETSLAN#ITIPQEK	EQMQEILDFETSLAN(1)ITIPQEK	40238000	0.0112313
gnl|Xelaev18037982m|PAC4GC:7356648|emc1.S	FINYN#QTISR	FINYN(1)QTISR	1771800000	0.494549
gnl|Xelaev18038037m|PAC4GC:7356273|loc100492852.S	VADLPGCSGGVPENCN#LTALEKEQR	VADLPGCSGGVPENCN(0.972)LTALEKEQR	71841000	0.0200524
gnl|Xelaev18038037m|PAC4GC:7356273|loc100492852.S	ALTLQVYGQN#FTLTR	ALTLQVYGQN(1)FTLTR	38158000	0.0106507
gnl|Xelaev18038037m|PAC4GC:7356273|loc100492852.S	DDSCGLLN#NTINGPFR	DDSCGLLN(0.99)NTINGPFR	34824000	0.00972015
gnl|Xelaev18038037m|PAC4GC:7356273|loc100492852.S	VNTN#DSFCWDTCEGK	VNTN(0.998)DSFCWDTCEGK	25052000	0.00699257
gnl|Xelaev18038069m|PAC4GC:7356721|b4galt3.S	ELQPLYTN#ITVDIGTDK	ELQPLYTN(1)ITVDIGTDK	17502000	0.0048852
gnl|Xelaev18038087m|PAC4GC:7347651|atp6ap1.2.L	LN#ESVPSLLVVR	LN(1)ESVPSLLVVR	345680000	0.0964869
gnl|Xelaev18038087m|PAC4GC:7347651|atp6ap1.2.L	QLLATAQPTPDYPPVAFN#SSR	QLLATAQPTPDYPPVAFN(1)SSR	40182000	0.0112157
gnl|Xelaev18038091m|PAC4GC:7347865|plxna3.L	LSEN#LTELR	LSEN(1)LTELR	92816000	0.025907
gnl|Xelaev18038091m|PAC4GC:7347865|plxna3.L	APGIYSPNGEAIPEEGLQPDEFGFILDN#VTSLR	APGIYSPNGEAIPEEGLQPDEFGFILDN(1)VTSLR	9895100	0.00276194
gnl|Xelaev18038091m|PAC4GC:7347865|plxna3.L	VN#STEGCPEIIPTGEILIPVGVVQPITLK	VN(1)STEGCPEIIPTGEILIPVGVVQPITLK	8522800	0.0023789
gnl|Xelaev18038227m|PAC4GC:7346247|abca2.L	LRLDEVN#ATVTQR	LRLDEVN(1)ATVTQR	12530000	0.0034974
gnl|Xelaev18038235m|PAC4GC:7346645|entpd2.L	LLN#WTDPTSSDKVLAAVSTTIK	LLN(1)WTDPTSSDKVLAAVSTTIK	579370000	0.161715
gnl|Xelaev18038275m|PAC4GC:7347188|angptl2.L	VLN#QTAEMLQLTNK	VLN(1)QTAEMLQLTNK	88631000	0.0247389
gnl|Xelaev18038275m|PAC4GC:7347188|angptl2.L	YQHLASLASN#QSIVISQLEEHCR	YQHLASLASN(1)QSIVISQLEEHCR	21287000	0.00594167
gnl|Xelaev18038282m|PAC4GC:7348150|adamts13.L	GSISLN#VTHPSVLEDK	GSISLN(1)VTHPSVLEDK	35709000	0.00996717
gnl|Xelaev18038282m|PAC4GC:7348150|adamts13.L	KDGN#ISYPLPHSK	KDGN(1)ISYPLPHSK	3956400	0.00110432
gnl|Xelaev18038329m|PAC4GC:7347258|col5a1.L	VFCN#FTAGGESCIFPDKK	VFCN(1)FTAGGESCIFPDKK	17447000	0.00486984
gnl|Xelaev18038377m|PAC4GC:7348208|LOC549858.L	ANDIPN#ITVAEGR	ANDIPN(1)ITVAEGR	73760000	0.020588
gnl|Xelaev18038379m|PAC4GC:7347591|loc100497509.L	HIHIIN#VTGYQR	HIHIIN(1)VTGYQR	54536000	0.0152222
gnl|Xelaev18038379m|PAC4GC:7347591|loc100497509.L	AHEIPN#ITIGEGR	AHEIPN(1)ITIGEGR	51752000	0.0144451
gnl|Xelaev18038379m|PAC4GC:7347591|loc100497509.L	LTN#FCHSAMMTDK	LTN(1)FCHSAMMTDK	8926900	0.0024917
gnl|Xelaev18038473m|PAC4GC:7346830|tnc.L	LFEPMTLN#VSGK	LFEPMTLN(1)VSGK	350110000	0.0977234
gnl|Xelaev18038623m|PAC4GC:7347820|efnb1.L	RNQDYYITSTSN#STLQGLENR	RNQDYYITSTSN(1)STLQGLENR	331910000	0.0926434
gnl|Xelaev18038714m|PAC4GC:7345901|atp1b4.L	LTHVN#YTSPLIAMQFTEVK	LTHVN(1)YTSPLIAMQFTEVK	249270000	0.0695768
gnl|Xelaev18038715m|PAC4GC:7347128|lamp2.L	KGLLSSPATFLGPVPLN#STYK	KGLLSSPATFLGPVPLN(1)STYK	1127400000	0.314682
gnl|Xelaev18038715m|PAC4GC:7347128|lamp2.L	LEAFVPN#GTLGK	LEAFVPN(1)GTLGK	1043000000	0.291124
gnl|Xelaev18038715m|PAC4GC:7347128|lamp2.L	N#VTQIIYDVK	N(1)VTQIIYDVK	642630000	0.179372
gnl|Xelaev18038715m|PAC4GC:7347128|lamp2.L	DDKN#ATCIYAK	DDKN(1)ATCIYAK	20618000	0.00575494
gnl|Xelaev18038715m|PAC4GC:7347128|lamp2.L	QNQN#LSDWEASVGSSYMCHK	QNQN(0.909)LSDWEASVGSSYMCHK	7129200	0.00198992
gnl|Xelaev18038822m|PAC4GC:7346743|vsig1.L	GSLIIGN#LTDFEEGYYR	GSLIIGN(1)LTDFEEGYYR	54191000	0.0151259
gnl|Xelaev18038826m|PAC4GC:7347524|Xelaev18038826m	VIVVDVNDNTPVITAPPLVN#GTSEVSIPR	VIVVDVNDNTPVITAPPLVN(1)GTSEVSIPR	14276000	0.00398475
gnl|Xelaev18038841m|PAC4GC:7346718|tspan6.L	NSFQQGYLQALQQYN#STGDPR	NSFQQGYLQALQQYN(1)STGDPR	283170000	0.079039
gnl|Xelaev18038846m|PAC4GC:7346922|slitrk2.L	IATIQEGAFSN#LTSLR	IATIQEGAFSN(1)LTSLR	1895000	0.000528936
gnl|Xelaev18038851m|PAC4GC:7345781|ids.L	LYPIEN#ISLAPDPDIPK	LYPIEN(1)ISLAPDPDIPK	17655000	0.0049279
gnl|Xelaev18038901m|PAC4GC:7347059|Xelaev18038901m	VHAIDN#DTGINADLR	VHAIDN(1)DTGINADLR	9720800	0.00271329
gnl|Xelaev18038901m|PAC4GC:7347059|Xelaev18038901m	ATVTIN#ITDINDNIPSIDTR	ATVTIN(0.988)ITDINDNIPSIDTR	1223900	0.000341618
gnl|Xelaev18039030m|PAC4GC:7347782|LOC100489507.L	FYFNKN#QTCK	FYFNKN(1)QTCK	20241000	0.00564971
gnl|Xelaev18039083m|PAC4GC:7347964|clptm1.L	DYIPIN#TSVSTLPLR	DYIPIN(1)TSVSTLPLR	1656200000	0.462282
gnl|Xelaev18039083m|PAC4GC:7347964|clptm1.L	ESFTEFN#STSAVFWEQR	ESFTEFN(1)STSAVFWEQR	13959000	0.00389627
gnl|Xelaev18039109m|PAC4GC:7346065|gabbr1.L	GISN#MTSQEFMEK	GISN(1)MTSQEFMEK	11100000	0.00309826
gnl|Xelaev18039156m|PAC4GC:7348278|c4a.L	VTMDSSMNTIN#NSLGADGISK	VTMDSSMNTIN(0.928)NSLGADGISK	9356800	0.00261169
gnl|Xelaev18039161m|PAC4GC:7346043|atf6b.L	MSLVMPAMSVNDSVYN#TTR	MSLVMPAMSVNDSVYN(0.999)TTR	18725000	0.00522656
gnl|Xelaev18039165m|PAC4GC:7348161|ppt2.L	NLLQYIN#ESHPGTN#VTVLDLFDNK	NLLQYIN(1)ESHPGTN(1)VTVLDLFDNK	167400000	0.046725
gnl|Xelaev18039178m|PAC4GC:7348189|neu1.L	N#LSHEIGTK	N(1)LSHEIGTK	65658000	0.0183266
gnl|Xelaev18039178m|PAC4GC:7348189|neu1.L	CSVSSLMITN#SSDDGLTWSPPR	CSVSSLMITN(1)SSDDGLTWSPPR	4153100	0.00115922
gnl|Xelaev18039203m|PAC4GC:7345849|ly6g6c.L	QACDTNCVSN#TTTQTDAIFNLDYQK	QACDTNCVSN(0.999)TTTQTDAIFNLDYQK	37520000	0.0104727
gnl|Xelaev18039284m|PAC4GC:7347936|kcnk6.L	YGVSVLHNASN#DSK	YGVSVLHNASN(0.968)DSK	24144000	0.00673912
gnl|Xelaev18039284m|PAC4GC:7347936|kcnk6.L	NIFLNESPCVN#VSSLEAFLEK	NIFLNESPCVN(0.97)VSSLEAFLEK	2378900	0.000664004
gnl|Xelaev18039299m|PAC4GC:7347040|pld3.L	ELGATIYN#CSCLAQDLKK	ELGATIYN(1)CSCLAQDLKK	304280000	0.0849313
gnl|Xelaev18039299m|PAC4GC:7347040|pld3.L	DTPMQVMLN#STASQVYLSSSPPPLSATGR	DTPMQVMLN(1)STASQVYLSSSPPPLSATGR	221970000	0.0619567
gnl|Xelaev18039339m|PAC4GC:7347828|olfm4.L	LN#STTLTVEK	LN(1)STTLTVEK	595950000	0.166343
gnl|Xelaev18039344m|PAC4GC:7345923|tgfb1.L	MTVPSEAIFLYN#STLEVIR	MTVPSEAIFLYN(1)STLEVIR	3802300	0.00106131
gnl|Xelaev18039436m|PAC4GC:7346202|entpd5.L	LLPVN#QSDALLSEVR	LLPVN(1)QSDALLSEVR	288060000	0.0804039
gnl|Xelaev18039436m|PAC4GC:7346202|entpd5.L	NTLDQTPHDFLASVELFN#STYR	NTLDQTPHDFLASVELFN(1)STYR	75302000	0.0210185
gnl|Xelaev18039444m|PAC4GC:7345960|npc2.L	RGDVYTIN#TTFVSNVNSK	RGDVYTIN(1)TTFVSNVNSK	340570000	0.0950606
gnl|Xelaev18039504m|PAC4GC:7347747|sel1l.L	EAAIFGEN#ETFPR	EAAIFGEN(1)ETFPR	287670000	0.0802951
gnl|Xelaev18039504m|PAC4GC:7347747|sel1l.L	MYSEGSDSVTQSN#ETALQYFR	MYSEGSDSVTQSN(1)ETALQYFR	9711400	0.00271067
gnl|Xelaev18039504m|PAC4GC:7347747|sel1l.L	GQMALGFLYASGLGLN#SSQAK	GQMALGFLYASGLGLN(1)SSQAK	1937700	0.000540855
gnl|Xelaev18039504m|PAC4GC:7347747|sel1l.L	MLN#ESSKR	MLN(1)ESSKR	1406300	0.000392529
gnl|Xelaev18039510m|PAC4GC:7347766|flrt2.L	LDENRIDTISDQAFQN#LTNVER	LDENRIDTISDQAFQN(0.999)LTNVER	20973000	0.00585403
gnl|Xelaev18039551m|PAC4GC:7347715|lgmn.L	GVIINRPN#GTDVYAGVLK	GVIINRPN(0.995)GTDVYAGVLK	513850000	0.143427
gnl|Xelaev18039571m|PAC4GC:7348045|serpina10.L	AN#LTDLTEER	AN(1)LTDLTEER	161960000	0.0452066
gnl|Xelaev18039573m|PAC4GC:7348058|serpina6.L	N#DTAMLLVVPQLGK	N(1)DTAMLLVVPQLGK	4566600000	1.27464
gnl|Xelaev18039575m|PAC4GC:7347216|serpina3k.L	GN#ATALFILPDEGK	GN(1)ATALFILPDEGK	4374100	0.00122091
gnl|Xelaev18039576m|PAC4GC:7345951|serpina1.L	GQTLNQIVEGLDFN#TTEISEEDIHK	GQTLNQIVEGLDFN(1)TTEISEEDIHK	896720000	0.250294
gnl|Xelaev18039576m|PAC4GC:7345951|serpina1.L	LGCTVVQIPYKGN#ASALFILPDEGK	LGCTVVQIPYKGN(1)ASALFILPDEGK	609500000	0.170125
gnl|Xelaev18039576m|PAC4GC:7345951|serpina1.L	GKWDKPFDEELTQDGIFYVDENTN#VTVPMMR	GKWDKPFDEELTQDGIFYVDENTN(0.962)VTVPMMR	149910000	0.0418432
gnl|Xelaev18039667m|PAC4GC:7346506|nid2.L	LRQN#VTYQECSHSQK	LRQN(1)VTYQECSHSQK	70098000	0.0195659
gnl|Xelaev18039678m|PAC4GC:7347081|nin.L	QQKHQN#QSSMVKVLEQEK	QQKHQN(1)QSSMVKVLEQEK	10370000	0.0028945
gnl|Xelaev18039841m|PAC4GC:7346239|tmem260.L	NLYN#WTEEHGR	NLYN(1)WTEEHGR	116810000	0.0326043
gnl|Xelaev18039841m|PAC4GC:7346239|tmem260.L	NLLFSMPN#DSIILLR	NLLFSMPN(1)DSIILLR	32018000	0.00893693
gnl|Xelaev18039861m|PAC4GC:7347071|tyro3.L	LISAPPFAVLLDELQPLTN#HSVR	LISAPPFAVLLDELQPLTN(1)HSVR	48079000	0.0134199
gnl|Xelaev18039875m|PAC4GC:7346281|sil1.L	MLLYKEN#NTEQYEQK	MLLYKEN(0.984)NTEQYEQK	82854000	0.0231264
gnl|Xelaev18039875m|PAC4GC:7346281|sil1.L	IVNRFN#SSSSTTEK	IVNRFN(0.996)SSSSTTEK	10255000	0.0028624
gnl|Xelaev18040031m|PAC4GC:7347248|tmem87a.L	ILFQN#STIYIK	ILFQN(1)STIYIK	23308000	0.00650578
gnl|Xelaev18040093m|PAC4GC:7348008|mmp19-like.2.L	ILN#TTAQLPEKLVKDELSK	ILN(1)TTAQLPEKLVKDELSK	898430000	0.250772
gnl|Xelaev18040093m|PAC4GC:7348008|mmp19-like.2.L	LN#QTTATN#TTDIK	LN(1)QTTATN(1)TTDIK	101870000	0.0284342
gnl|Xelaev18040093m|PAC4GC:7348008|mmp19-like.2.L	NFIVYNPGTGN#STSAQSLQDDWVGVK	NFIVYNPGTGN(0.979)STSAQSLQDDWVGVK	14663000	0.00409277
gnl|Xelaev18040146m|PAC4GC:7345669|thbs1.L	VVN#STSGPGEHLR	VVN(1)STSGPGEHLR	1383100000	0.386054
gnl|Xelaev18040146m|PAC4GC:7345669|thbs1.L	N#ITLFVQEDR	N(1)ITLFVQEDR	15112000	0.00421809
gnl|Xelaev18040146m|PAC4GC:7345669|thbs1.L	NKGCPSMTNSVITLDNAVN#GSSPAIR	NKGCPSMTNSVITLDNAVN(0.975)GSSPAIR	11931000	0.00333021
gnl|Xelaev18040333m|PAC4GC:7346728|crp.1.L	VFLFPEESN#SSYVK	VFLFPEESN(1)SSYVK	685070000	0.191218
gnl|Xelaev18040345m|PAC4GC:7346837|cers2.L	LWLPIN#LTWADLEDKDDR	LWLPIN(1)LTWADLEDKDDR	21663000	0.00604662
gnl|Xelaev18040353m|PAC4GC:7348170|ctsk.L	AYPYVGEDQECMYN#VSGR	AYPYVGEDQECMYN(1)VSGR	36081000	0.010071
gnl|Xelaev18040479m|PAC4GC:7346821|Xelaev18040479m	LEGSNN#GTSLQIR	LEGSNN(0.977)GTSLQIR	17693000	0.00493851
gnl|Xelaev18040479m|PAC4GC:7346821|Xelaev18040479m	DKDTDILYAN#GSTISVSLK	DKDTDILYAN(1)GSTISVSLK	3364200	0.000939023
gnl|Xelaev18040490m|PAC4GC:7345888|Xetrov90022233m.L	DN#GTDILYANGNTISISLR	DN(1)GTDILYANGNTISISLR	3204300	0.000894391
gnl|Xelaev18040491m|PAC4GC:7346290|LOC100486501.L	HLHCSVPSN#STK	HLHCSVPSN(1)STK	2172100	0.000606281
gnl|Xelaev18040538m|PAC4GC:7346457|bcan.L	VAFIPQN#K.S	VAFIPQN(1)K.S	330650000	0.0922917
gnl|Xelaev18040538m|PAC4GC:7346457|bcan.L	ALMPHYAESVNDATLILNSLITN#DSGIYR	ALMPHYAESVNDATLILNSLITN(1)DSGIYR	327660000	0.0914571
gnl|Xelaev18040538m|PAC4GC:7346457|bcan.L	N#QTGFPDSMAK	N(1)QTGFPDSMAK	25845000	0.00721391
gnl|Xelaev18040551m|PAC4GC:7347525|fkbp9.L	YHYN#GSLMDGTLFDSSHNR	YHYN(1)GSLMDGTLFDSSHNR	3171500000	0.885236
gnl|Xelaev18040551m|PAC4GC:7347525|fkbp9.L	YHYN#ATLMDGTVLDSTHQYGK	YHYN(1)ATLMDGTVLDSTHQYGK	2660000000	0.742465
gnl|Xelaev18040551m|PAC4GC:7347525|fkbp9.L	YHYN#GSLLDGTFFDSSYSR	YHYN(1)GSLLDGTFFDSSYSR	770710000	0.215122
gnl|Xelaev18040556m|PAC4GC:7346099|kirrel.L	AGTPTN#LTCR	AGTPTN(1)LTCR	34945000	0.00975392
gnl|Xelaev18040621m|PAC4GC:7346924|f13b.L	VIEYICHEHYVPLN#K.T	VIEYICHEHYVPLN(1)K.T	269940000	0.0753462
gnl|Xelaev18040622m|PAC4GC:7347447|Xelaev18040622m	AYEISN#SSLLR	AYEISN(1)SSLLR	139440000	0.0389208
gnl|Xelaev18040622m|PAC4GC:7347447|Xelaev18040622m	CLHGYGISN#SSLLDVK	CLHGYGISN(1)SSLLDVK	12290000	0.00343041
gnl|Xelaev18040622m|PAC4GC:7347447|Xelaev18040622m	CHQN#YTLVGEK	CHQN(1)YTLVGEK	7863400	0.00219485
gnl|Xelaev18040625m|PAC4GC:7347554|LOC100497957-like.L	LEGNQN#ITCR	LEGNQN(0.998)ITCR	241940000	0.0675308
gnl|Xelaev18040629m|PAC4GC:7345525|LOC100498477.L	VYKPLEAEDILIHHN#ITGK	VYKPLEAEDILIHHN(1)ITGK	6638500	0.00185295
gnl|Xelaev18040642m|PAC4GC:7346196|ncstn.L	MSN#NSWFQSIIK	MSN(0.994)NSWFQSIIK	229910000	0.064173
gnl|Xelaev18040642m|PAC4GC:7346196|ncstn.L	KIYISLN#STSPCVR	KIYISLN(1)STSPCVR	204090000	0.056966
gnl|Xelaev18040647m|PAC4GC:7348047|sema6c.L	VLSSTTEN#STVETLLLEDINVYNPAK	VLSSTTEN(0.999)STVETLLLEDINVYNPAK	3715400	0.00103705
gnl|Xelaev18040680m|PAC4GC:7345696|vsig8.L	N#ISDVYGGQYR	N(1)ISDVYGGQYR	50874000	0.0142001
gnl|Xelaev18040803m|PAC4GC:7346121|sema4a.L	EHFLMDEVVSPN#GSEPVLVK	EHFLMDEVVSPN(1)GSEPVLVK	34583000	0.00965288
gnl|Xelaev18040934m|PAC4GC:7346461|gba.L	DFIASDLGPAFAN#SSHK	DFIASDLGPAFAN(1)SSHK	242410000	0.067662
gnl|Xelaev18041093m|PAC4GC:7340878|tyro3.S	LISVPPFAVALDDLQPLTN#HSVR	LISVPPFAVALDDLQPLTN(1)HSVR	3512200	0.000980333
gnl|Xelaev18041213m|PAC4GC:7341336|nid2.S	QN#VTYQECSHSR	QN(1)VTYQECSHSR	48888000	0.0136457
gnl|Xelaev18041262m|PAC4GC:7341817|hhipl1.S	LATPFLN#ISK	LATPFLN(1)ISK	48778000	0.013615
gnl|Xelaev18041293m|PAC4GC:7341134|serpina1.S	LGCTVVQIPYKGN#ATSLFILPDEGK	LGCTVVQIPYKGN(1)ATSLFILPDEGK	665860000	0.185856
gnl|Xelaev18041344m|PAC4GC:7340140|flrt2.S	IATISDQAFQN#LTNVER	IATISDQAFQN(1)LTNVER	17079000	0.00476713
gnl|Xelaev18041346m|PAC4GC:7340739|sel1l.S	ILN#ESSKR	ILN(1)ESSKR	26373000	0.00736129
gnl|Xelaev18041377m|PAC4GC:7340238|npc2.S	RGDTYTIN#ATFISNVNSK	RGDTYTIN(1)ATFISNVNSK	260790000	0.0727923
gnl|Xelaev18041445m|PAC4GC:7341549|mamdc4.S	LLIN#YTDAKK	LLIN(1)YTDAKK	73028000	0.0203837
gnl|Xelaev18041445m|PAC4GC:7341549|mamdc4.S	WGTDN#GTLTGGDTK	WGTDN(1)GTLTGGDTK	28452000	0.00794158
gnl|Xelaev18041445m|PAC4GC:7341549|mamdc4.S	VQLPDTEHN#VTIEGIAGAGPDSVVALDDVILSPGCR	VQLPDTEHN(1)VTIEGIAGAGPDSVVALDDVILSPGCR	1948000	0.00054373
gnl|Xelaev18041477m|PAC4GC:7341703|entpd2.S	LLN#WTDQASSDKVLDAVSATIK	LLN(1)WTDQASSDKVLDAVSATIK	234000000	0.0653146
gnl|Xelaev18041477m|PAC4GC:7341703|entpd2.S	FTEDSFPN#ISFQK	FTEDSFPN(1)ISFQK	22584000	0.00630369
gnl|Xelaev18041552m|PAC4GC:7340271|olfm1.S	VQN#MSQSIEVLDRR	VQN(1)MSQSIEVLDRR	61155000	0.0170697
gnl|Xelaev18041554m|PAC4GC:7341525|col5a1.S	VFCN#FTAGGESCIIPDKK	VFCN(1)FTAGGESCIIPDKK	7027800	0.00196161
gnl|Xelaev18041652m|PAC4GC:7340035|gpr107.S	GPIEYN#ATMHVEK	GPIEYN(1)ATMHVEK	853700000	0.238287
gnl|Xelaev18041652m|PAC4GC:7340035|gpr107.S	HDMPLVSISEKTEEPPKN#ITK	HDMPLVSISEKTEEPPKN(1)ITK	22712000	0.00633942
gnl|Xelaev18041712m|PAC4GC:7341933|eng.S	VTLEAN#DTCK	VTLEAN(1)DTCK	10023000	0.00279764
gnl|Xelaev18041731m|PAC4GC:7341908|plxnb3.S	LLTGDLIN#VTVGDIPCK	LLTGDLIN(1)VTVGDIPCK	29587000	0.00825839
gnl|Xelaev18041731m|PAC4GC:7341908|plxnb3.S	LSN#ITDIIFQTIDPGDNQFVAANDPK	LSN(1)ITDIIFQTIDPGDNQFVAANDPK	1167700	0.000325931
gnl|Xelaev18041745m|PAC4GC:7340261|bgn.S	MIEN#GSLSYMPVLR	MIEN(1)GSLSYMPVLR	36444000	0.0101723
gnl|Xelaev18041783m|PAC4GC:7340719|l1cam.S	VIAVNEVGPSN#GSNPSDR	VIAVNEVGPSN(1)GSNPSDR	1449700000	0.404643
gnl|Xelaev18041783m|PAC4GC:7340719|l1cam.S	LSEGSLVLNNMQLN#DTSVVQCEAR	LSEGSLVLNNMQLN(1)DTSVVQCEAR	92944000	0.0259427
gnl|Xelaev18041783m|PAC4GC:7340719|l1cam.S	ASEPKPIIGHSGEDFPDISPENVGLEAMN#ESAIK	ASEPKPIIGHSGEDFPDISPENVGLEAMN(0.998)ESAIK	74511000	0.0207977
gnl|Xelaev18041783m|PAC4GC:7340719|l1cam.S	LMALN#HTQHVEIWSK	LMALN(1)HTQHVEIWSK	44445000	0.0124056
gnl|Xelaev18041783m|PAC4GC:7340719|l1cam.S	YFSETINDPTQQN#WTLSNISSK	YFSETINDPTQQN(0.999)WTLSNISSK	37572000	0.0104872
gnl|Xelaev18041783m|PAC4GC:7340719|l1cam.S	VIWMN#SSLLHITQDKR	VIWMN(1)SSLLHITQDKR	29369000	0.00819754
gnl|Xelaev18041783m|PAC4GC:7340719|l1cam.S	VHGN#TTHALITGLKPFSN#YSVEVAIMNGK	VHGN(1)TTHALITGLKPFSN(1)YSVEVAIMNGK	20392000	0.00569186
gnl|Xelaev18041783m|PAC4GC:7340719|l1cam.S	QSDTSLTLIWGPPETPNGILTGYEIYHQIVN#K.T	QSDTSLTLIWGPPETPNGILTGYEIYHQIVN(1)K.T	8472900	0.00236497
gnl|Xelaev18041846m|PAC4GC:7340098|crb2.S	EGN#VTVTEPQQELYLGK	EGN(1)VTVTEPQQELYLGK	13915000	0.00388398
gnl|Xelaev18042091m|PAC4GC:7341752|lamp2.S	LEAFMAN#GTLGK	LEAFMAN(1)GTLGK	549320000	0.153327
gnl|Xelaev18042091m|PAC4GC:7341752|lamp2.S	EVVVSEN#VTQIIYDVK	EVVVSEN(1)VTQIIYDVK	125440000	0.0350131
gnl|Xelaev18042091m|PAC4GC:7341752|lamp2.S	KGLISSTAMFLGPVPLN#STYK	KGLISSTAMFLGPVPLN(1)STYK	97805000	0.0272995
gnl|Xelaev18042168m|PAC4GC:7340018|tspan6.S	VLGN#CTEADMIDIVK	VLGN(1)CTEADMIDIVK	351020000	0.0979774
gnl|Xelaev18042168m|PAC4GC:7340018|tspan6.S	NSFEQGYFEALQQYN#STGDPR	NSFEQGYFEALQQYN(1)STGDPR	278060000	0.0776127
gnl|Xelaev18042352m|PAC4GC:7340869|slc1a5.S	LEHVN#SSVLGDMN#STWVK	LEHVN(1)SSVLGDMN(1)STWVK	4773100	0.00133228
gnl|Xelaev18042379m|PAC4GC:7340094|clptm1.S	DYIPIN#TSVSALPLR	DYIPIN(1)TSVSALPLR	856000000	0.238929
gnl|Xelaev18042392m|PAC4GC:7341736|LOC100492536.S	YTEYQIGN#MSLIITVPHGGSLQPSSIPSR	YTEYQIGN(1)MSLIITVPHGGSLQPSSIPSR	38959000	0.0108743
gnl|Xelaev18042448m|PAC4GC:7341801|slc44a4.S	AN#ISEAASQILDSFNFQNVGK	AN(1)ISEAASQILDSFNFQNVGK	4400900	0.00122839
gnl|Xelaev18042453m|PAC4GC:7341442|cfb.S	VPIIGGN#YTVSNGGNVGSK	VPIIGGN(1)YTVSNGGNVGSK	10961000	0.00305946
gnl|Xelaev18042468m|PAC4GC:7340647|clic1.S	GVTFN#VTTVDMK	GVTFN(1)VTTVDMK	14156000	0.00395125
gnl|Xelaev18042518m|PAC4GC:7341571|pld3.S	FVLVESIPEGLVYDAN#STINPSIFK	FVLVESIPEGLVYDAN(0.999)STINPSIFK	18646000	0.00520451
gnl|Xelaev18042546m|PAC4GC:7340205|tgfb1.S	FIFN#ASNVR	FIFN(1)ASNVR	28813000	0.00804235
gnl|Xelaev18042546m|PAC4GC:7340205|tgfb1.S	MELFWENKEN#VSR	MELFWENKEN(0.992)VSR	3899200	0.00108835
gnl|Xelaev18042546m|PAC4GC:7340205|tgfb1.S	MTMPSEAIFLYN#STLEVIR	MTMPSEAIFLYN(1)STLEVIR	2814700	0.000785645
gnl|Xelaev18042636m|PAC4GC:7341400|tmem87a.S	ILFQN#STIFIK	ILFQN(1)STIFIK	135200000	0.0377373
gnl|Xelaev18042684m|PAC4GC:7341263|LOC100490432-like.S	INEN#FTFPESTR	INEN(1)FTFPESTR	23800000	0.00664311
gnl|Xelaev18042717m|PAC4GC:7340101|cers2.S	LWLPVN#LTWADLEDKEGR	LWLPVN(1)LTWADLEDKEGR	28185000	0.00786706
gnl|Xelaev18042740m|PAC4GC:7341047|LOC101732455-like.S	VMDPVSVSN#ITTNR	VMDPVSVSN(0.984)ITTNR	22493000	0.00627829
gnl|Xelaev18042747m|PAC4GC:7340377|sv2a.S	FTN#STFLHSK	FTN(1)STFLHSK	842770000	0.235236
gnl|Xelaev18042770m|PAC4GC:7341204|LOC100492862.S	N#GSTINVALR	N(1)GSTINVALR	74083000	0.0206782
gnl|Xelaev18042770m|PAC4GC:7341204|LOC100492862.S	EIVFN#LTVYEPLPTPN#ITSTLR	EIVFN(1)LTVYEPLPTPN(1)ITSTLR	16127000	0.0045014
gnl|Xelaev18042776m|PAC4GC:7341992|bcan.S	ELMLPEANAENEAQGFVDSIPLN#K.T	ELMLPEANAENEAQGFVDSIPLN(1)K.T	6093900	0.00170094
gnl|Xelaev18042802m|PAC4GC:7341697|ncstn.S	LLN#ATHQVGCQSSK	LLN(1)ATHQVGCQSSK	736930000	0.205693
gnl|Xelaev18042802m|PAC4GC:7341697|ncstn.S	KIYIPLN#STAPCVR	KIYIPLN(1)STAPCVR	357600000	0.0998141
gnl|Xelaev18042802m|PAC4GC:7341697|ncstn.S	MSN#NSWFQSIIK	MSN(0.994)NSWFQSIIK	239360000	0.0668107
gnl|Xelaev18042802m|PAC4GC:7341697|ncstn.S	LN#GTQDLPR	LN(1)GTQDLPR	55644000	0.0155315
gnl|Xelaev18042802m|PAC4GC:7341697|ncstn.S	ELYSYTWVQGPIESN#TTSR	ELYSYTWVQGPIESN(1)TTSR	24083000	0.0067221
gnl|Xelaev18042889m|PAC4GC:7342011|glmp.S	IFEYQDVN#NTAN#FSGTDEK	IFEYQDVN(0.992)NTAN(1)FSGTDEK	46171000	0.0128873
gnl|Xelaev18042917m|PAC4GC:7341010|sema4a.S	NSN#GTIITMDGR	NSN(0.992)GTIITMDGR	24751000	0.00690855
gnl|Xelaev18042917m|PAC4GC:7341010|sema4a.S	LLHQAPWPAN#DTSIINCVNK	LLHQAPWPAN(1)DTSIINCVNK	17732000	0.00494939
gnl|Xelaev18043036m|PAC4GC:7341448|f11r.S	NKSPMQIAPQN#STYTIDPK	NKSPMQIAPQN(1)STYTIDPK	480810000	0.134205
gnl|Xelaev18043096m|PAC4GC:7360088|fkbp10.L	DSVDIEVMHKPDSCN#TTSK	DSVDIEVMHKPDSCN(1)TTSK	1298700000	0.362496
gnl|Xelaev18043098m|PAC4GC:7358684|p3h4.L	AYN#SCLTACEGAYQMR	AYN(1)SCLTACEGAYQMR	20106000	0.00561203
gnl|Xelaev18043163m|PAC4GC:7360802|erbb2.L	MRN#LTEILK	MRN(1)LTEILK	33177000	0.00926043
gnl|Xelaev18043272m|PAC4GC:7361191|itga3.L	EIYYPTN#K.T	EIYYPTN(1)K.T	98258000	0.027426
gnl|Xelaev18043272m|PAC4GC:7361191|itga3.L	ECHPSGNVINPLN#LTVSDTSVK	ECHPSGNVINPLN(0.999)LTVSDTSVK	27851000	0.00777383
gnl|Xelaev18043297m|PAC4GC:7360564|sgca.L	LTVIN#ISSALDKGGR	LTVIN(1)ISSALDKGGR	217580000	0.0607314
gnl|Xelaev18043354m|PAC4GC:7361233|Xelaev18043354m	AFADDYN#STAETILFK	AFADDYN(1)STAETILFK	94437000	0.0263595
gnl|Xelaev18043355m|PAC4GC:7360687|Xelaev18043355m	EADTFLSNYN#K.S	EADTFLSNYN(0.991)K.S	53216000	0.0148538
gnl|Xelaev18043355m|PAC4GC:7360687|Xelaev18043355m	GWN#ATHMFR	GWN(1)ATHMFR	9148000	0.00255341
gnl|Xelaev18043375m|PAC4GC:7360433|itgb3.L	NAVN#CTYKDENDCVVR	NAVN(0.957)CTYKDENDCVVR	52536000	0.014664
gnl|Xelaev18043375m|PAC4GC:7360433|itgb3.L	IGWRN#ESSHLLVFTTDAR	IGWRN(1)ESSHLLVFTTDAR	1352100	0.000377401
gnl|Xelaev18043381m|PAC4GC:7360327|crtap.L	FYN#VTTLQR	FYN(1)VTTLQR	495050000	0.138179
gnl|Xelaev18043428m|PAC4GC:7359810|sulf2.L	YLNEYN#GTYVPPGWK	YLNEYN(0.999)GTYVPPGWK	17923000	0.00500271
gnl|Xelaev18043428m|PAC4GC:7359810|sulf2.L	HGFDYAQDYLTDLITN#DSISFFR	HGFDYAQDYLTDLITN(1)DSISFFR	15138000	0.00422535
gnl|Xelaev18043477m|PAC4GC:7360158|znf217.L	QTISN#PTKKDFVK	QTISN(1)PTKKDFVK	756650000	0.211198
gnl|Xelaev18043519m|PAC4GC:7359906|lama5.L	QTQN#NSISDSITR	QTQN(1)NSISDSITR	55100000	0.0153796
gnl|Xelaev18043519m|PAC4GC:7359906|lama5.L	AIN#ASDAYSTIIDAVK	AIN(1)ASDAYSTIIDAVK	48422000	0.0135157
gnl|Xelaev18043519m|PAC4GC:7359906|lama5.L	VVLTIN#VTSPDLFR	VVLTIN(1)VTSPDLFR	35038000	0.00977988
gnl|Xelaev18043519m|PAC4GC:7359906|lama5.L	ISMTHDN#VTDDITSAK	ISMTHDN(1)VTDDITSAK	23252000	0.00649015
gnl|Xelaev18043533m|PAC4GC:7359275|LOC100492690.L	GN#HTLHLEIYDR	GN(1)HTLHLEIYDR	186260000	0.0519893
gnl|Xelaev18043548m|PAC4GC:7361289|ctsz.L	NVN#GTNYVSTTR	NVN(1)GTNYVSTTR	21278000	0.00593916
gnl|Xelaev18043730m|PAC4GC:7360944|nptx1.L	VNNLEEGKLTQKN#DTEQR	VNNLEEGKLTQKN(1)DTEQR	18041000	0.00503564
gnl|Xelaev18043820m|PAC4GC:7359940|cant1.L	MVHQVAGELYN#DTYPLTPPLR	MVHQVAGELYN(1)DTYPLTPPLR	192930000	0.053851
gnl|Xelaev18043832m|PAC4GC:7359823|Xelaev18043832m	VLENEN#QTAFELHGSMPR	VLENEN(0.961)QTAFELHGSMPR	170790000	0.0476713
gnl|Xelaev18043872m|PAC4GC:7361008|ctsa.L	QYSGFLN#VSDGK	QYSGFLN(1)VSDGK	1404100000	0.391915
gnl|Xelaev18043872m|PAC4GC:7361008|ctsa.L	LDPPCVN#STASR	LDPPCVN(1)STASR	69779000	0.0194769
gnl|Xelaev18043873m|PAC4GC:7360086|pltp.L	ITN#MTCDASIER	ITN(1)MTCDASIER	31605000	0.00882165
gnl|Xelaev18043873m|PAC4GC:7360086|pltp.L	FVEEELEN#ITIPDLSGK	FVEEELEN(1)ITIPDLSGK	26448000	0.00738222
gnl|Xelaev18043959m|PAC4GC:7358814|st3gal2.2.L	FN#GTVEPLLLGK	FN(1)GTVEPLLLGK	1493800	0.000416953
gnl|Xelaev18043979m|PAC4GC:7360078|pigt.L	PLGVAN#ITDHR	PLGVAN(1)ITDHR	21218000	0.00592241
gnl|Xelaev18044127m|PAC4GC:7360896|ogfod3.L	FVFIDESAN#R.T	FVFIDESAN(1)R.T	82102000	0.0229165
gnl|Xelaev18044276m|PAC4GC:7359218|pecam1.L	DSQHVYN#VTSNSR	DSQHVYN(1)VTSNSR	107390000	0.0299749
gnl|Xelaev18044276m|PAC4GC:7359218|pecam1.L	LIIDIAGLSKPTVSVSTN#STK	LIIDIAGLSKPTVSVSTN(1)STK	45047000	0.0125736
gnl|Xelaev18044276m|PAC4GC:7359218|pecam1.L	N#QSISMAVQGSTIDLR	N(1)QSISMAVQGSTIDLR	13653000	0.00381085
gnl|Xelaev18044276m|PAC4GC:7359218|pecam1.L	IEVLPSVN#FTEGEN#ITVK	IEVLPSVN(1)FTEGEN(1)ITVK	2832000	0.000790474
gnl|Xelaev18044344m|PAC4GC:7361021|lmln.L	YINGLPFFN#ESR	YINGLPFFN(1)ESR	4779300	0.00133401
gnl|Xelaev18044436m|PAC4GC:7359290|chpf.L	EIQN#TSSLSVEGEHSATWPLGINSPFQPR	EIQN(1)TSSLSVEGEHSATWPLGINSPFQPR	23079000	0.00644186
gnl|Xelaev18044449m|PAC4GC:7361061|mgat5.L	RQN#QSLVYGK	RQN(1)QSLVYGK	33131000	0.00924759
gnl|Xelaev18044461m|PAC4GC:7359900|lct.2.L	FGHENMAAQN#STANVASDSYHK	FGHENMAAQN(0.978)STANVASDSYHK	61318000	0.0171152
gnl|Xelaev18044471m|PAC4GC:7360353|glb1.L	ELQCGSLQDLYTTVDFGPGDN#ATK	ELQCGSLQDLYTTVDFGPGDN(1)ATK	22699000	0.00633579
gnl|Xelaev18044476m|PAC4GC:7360409|dnajb2.L	N#ATQDDIKR	N(1)ATQDDIKR	14438000	0.00402996
gnl|Xelaev18044492m|PAC4GC:7359521|abcb6.L	LGSYCEHN#GSISQAWLDR	LGSYCEHN(1)GSISQAWLDR	7897900	0.00220448
gnl|Xelaev18044591m|PAC4GC:7358808|galnt5.L	KSQQFN#YTWLR	KSQQFN(1)YTWLR	23226000	0.00648289
gnl|Xelaev18044618m|PAC4GC:7361164|itgb6.L	NKPLTEGAQEN#SSDATQISPQK	NKPLTEGAQEN(1)SSDATQISPQK	22790000	0.00636119
gnl|Xelaev18044625m|PAC4GC:7360674|dpp4.L	VLLDEVQMPTKEN#K.S	VLLDEVQMPTKEN(1)K.S	112560000	0.031418
gnl|Xelaev18044655m|PAC4GC:7361118|lrp2.L	NQIIADN#ITTQAHNIYPVIR	NQIIADN(1)ITTQAHNIYPVIR	231120000	0.0645107
gnl|Xelaev18044655m|PAC4GC:7361118|lrp2.L	FTDN#STQVVYR	FTDN(1)STQVVYR	126200000	0.0352252
gnl|Xelaev18044655m|PAC4GC:7361118|lrp2.L	AN#STTGSPSIIFSNGR	AN(1)STTGSPSIIFSNGR	36060000	0.0100651
gnl|Xelaev18044655m|PAC4GC:7361118|lrp2.L	MFLN#GTNK	MFLN(1)GTNK	35762000	0.00998196
gnl|Xelaev18044655m|PAC4GC:7361118|lrp2.L	EVLN#ISIETPENLAVDWVSNK	EVLN(1)ISIETPENLAVDWVSNK	35218000	0.00983012
gnl|Xelaev18044655m|PAC4GC:7361118|lrp2.L	VYYSDYLN#QTISSMAVDGSDR	VYYSDYLN(1)QTISSMAVDGSDR	31885000	0.00889981
gnl|Xelaev18044700m|PAC4GC:7359840|itga6.L	AN#HSGAVVLMR	AN(1)HSGAVVLMR	556600000	0.155359
gnl|Xelaev18044756m|PAC4GC:7358567|fkbp7.L	RGDLVNAHYDAYLAQN#MTK	RGDLVNAHYDAYLAQN(1)MTK	1292100000	0.360654
gnl|Xelaev18044800m|PAC4GC:7358677|col6a1.L	RN#FTATSAVGLTDDEIDNTIDTIIDMIK	RN(1)FTATSAVGLTDDEIDNTIDTIIDMIK	17420000	0.00486231
gnl|Xelaev18044852m|PAC4GC:7359585|abca12.L	LN#ASIVTEPFR	LN(1)ASIVTEPFR	4198900	0.00117201
gnl|Xelaev18044886m|PAC4GC:7360526|itgb2.L	HILN#LTANGK	HILN(1)LTANGK	43013000	0.0120059
gnl|Xelaev18044886m|PAC4GC:7360526|itgb2.L	QPN#FTNAGEPDSVR	QPN(0.984)FTNAGEPDSVR	13403000	0.00374107
gnl|Xelaev18044931m|PAC4GC:7360617|slc39a10.L	DLQIGLN#STR	DLQIGLN(1)STR	27633000	0.00771298
gnl|Xelaev18045039m|PAC4GC:7358904|dnajb11.L	RGDDLYTN#VSISLVEALIGFEMDITHLDSHK	RGDDLYTN(1)VSISLVEALIGFEMDITHLDSHK	70142000	0.0195782
gnl|Xelaev18045044m|PAC4GC:7359563|itgav.L	AN#TSQPGIIEGGDVIK	AN(1)TSQPGIIEGGDVIK	216530000	0.0604383
gnl|Xelaev18045044m|PAC4GC:7359563|itgav.L	NYAVN#ESIEFK	NYAVN(1)ESIEFK	188580000	0.0526368
gnl|Xelaev18045044m|PAC4GC:7359563|itgav.L	YNN#DTLLYIVK	YNN(0.964)DTLLYIVK	24578000	0.00686026
gnl|Xelaev18045141m|PAC4GC:7360604|LOC100496911.L	YGSPIILSGN#LTK	YGSPIILSGN(1)LTK	11412000	0.00318534
gnl|Xelaev18045149m|PAC4GC:7359772|naga.L	FDGCYSN#STEK	FDGCYSN(1)STEK	101570000	0.0283504
gnl|Xelaev18045149m|PAC4GC:7359772|naga.L	PYTTSLGLLN#ITQCTDGYK	PYTTSLGLLN(1)ITQCTDGYK	29987000	0.00837003
gnl|Xelaev18045226m|PAC4GC:7360026|ttyh3.L	VSN#TTTSLN#QTVEPSLQNLEVMFTK	VSN(1)TTTSLN(1)QTVEPSLQNLEVMFTK	7756300	0.00216495
gnl|Xelaev18045260m|PAC4GC:7360423|gnptg.L	MLNEHGISYVTN#GTSR	MLNEHGISYVTN(1)GTSR	123590000	0.0344967
gnl|Xelaev18045260m|PAC4GC:7360423|gnptg.L	YELCPFHN#VTQHEQTFR	YELCPFHN(1)VTQHEQTFR	17624000	0.00491925
gnl|Xelaev18045401m|PAC4GC:7358758|mgc145260.L	LSAFLLTN#STPGQTNDCR	LSAFLLTN(1)STPGQTNDCR	18934000	0.0052849
gnl|Xelaev18045401m|PAC4GC:7358758|mgc145260.L	DSSLN#CSELEPTEQK	DSSLN(1)CSELEPTEQK	16132000	0.0045028
gnl|Xelaev18045450m|PAC4GC:7360832|srl.L	VYGALFWSLAPLIN#VTEPPR	VYGALFWSLAPLIN(1)VTEPPR	6552000	0.00182881
gnl|Xelaev18045536m|PAC4GC:7360895|LOC101733400.L	MVN#LSQEVHQVVFK	MVN(1)LSQEVHQVVFK	53882000	0.0150397
gnl|Xelaev18045536m|PAC4GC:7360895|LOC101733400.L	IN#CTTPLTTDIISK	IN(1)CTTPLTTDIISK	52660000	0.0146986
gnl|Xelaev18045536m|PAC4GC:7360895|LOC101733400.L	EIN#DSDPYILTTLQSCPTFSTAQAAAIESQILR	EIN(1)DSDPYILTTLQSCPTFSTAQAAAIESQILR	2892200	0.000807277
gnl|Xelaev18045539m|PAC4GC:7359322|LOC101733326.L	DLNTN#FSTEAALSACTGTQIADFIATSGGLRDEK	DLNTN(0.977)FSTEAALSACTGTQIADFIATSGGLRDEK	49764000	0.0138902
gnl|Xelaev18045540m|PAC4GC:7360034|msln.L	LLDMDPSLIVN#ASK	LLDMDPSLIVN(1)ASK	424370000	0.118451
gnl|Xelaev18045540m|PAC4GC:7360034|msln.L	NVN#SSTWIK	NVN(1)SSTWIK	260450000	0.0726974
gnl|Xelaev18045540m|PAC4GC:7360034|msln.L	LNN#FTADALNNLGQTAVGLSQSQISSIKDSDLK	LNN(0.993)FTADALNNLGQTAVGLSQSQISSIKDSDLK	79484000	0.0221857
gnl|Xelaev18045540m|PAC4GC:7360034|msln.L	AFGN#MTPADVLEISQK	AFGN(1)MTPADVLEISQK	76884000	0.02146
gnl|Xelaev18045540m|PAC4GC:7360034|msln.L	LLPQN#FSCDSFQSVIK	LLPQN(1)FSCDSFQSVIK	56728000	0.015834
gnl|Xelaev18045540m|PAC4GC:7360034|msln.L	GIMSFVNMDILSN#ISR	GIMSFVNMDILSN(1)ISR	43591000	0.0121672
gnl|Xelaev18045540m|PAC4GC:7360034|msln.L	ILPSN#FSCDSFQAVMK	ILPSN(1)FSCDSFQAVMK	25498000	0.00711706
gnl|Xelaev18045540m|PAC4GC:7360034|msln.L	NFYTNVGAAN#ISVLSADSKK	NFYTNVGAAN(1)ISVLSADSKK	20248000	0.00565166
gnl|Xelaev18045540m|PAC4GC:7360034|msln.L	LSNNNSVAMLSN#LTGQFGN#VSR	LSNNNSVAMLSN(0.999)LTGQFGN(1)VSR	11918000	0.00332658
gnl|Xelaev18045540m|PAC4GC:7360034|msln.L	N#MTSVPSPLAQGLLNK	N(1)MTSVPSPLAQGLLNK	10981000	0.00306504
gnl|Xelaev18045582m|PAC4GC:7360967|pdia2.L	INSIDLVTEYSAETSDKIFAAQIPNHLLLFIN#K.S	INSIDLVTEYSAETSDKIFAAQIPNHLLLFIN(0.999)K.S	22542000	0.00629197
gnl|Xelaev18045586m|PAC4GC:7359321|tmem8a.L	LQLQN#CTSDNAR	LQLQN(1)CTSDNAR	17365000	0.00484696
gnl|Xelaev18045626m|PAC4GC:7359685|slc5a2.L	AVPTVLGN#VSESCAAPR	AVPTVLGN(1)VSESCAAPR	19700000	0.00549871
gnl|Xelaev18045686m|PAC4GC:7359755|itgax.L	YTN#FSSDGAITDIR	YTN(1)FSSDGAITDIR	46162000	0.0128848
gnl|Xelaev18045844m|PAC4GC:7339342|hm13.S	AELEPATLHN#ETEAAAN#GTGK	AELEPATLHN(1)ETEAAAN(1)GTGK	1057700000	0.295227
gnl|Xelaev18045850m|PAC4GC:7338615|atp6v0a1.S	HTSVLQLNPN#VTGVFNGPYPFGIDPIWSLATNK	HTSVLQLNPN(0.968)VTGVFNGPYPFGIDPIWSLATNK	35707000	0.00996661
gnl|Xelaev18045869m|PAC4GC:7337940|fkbp10.S	YHYN#GTFKDGQK	YHYN(1)GTFKDGQK	6252100000	1.7451
gnl|Xelaev18045869m|PAC4GC:7337940|fkbp10.S	YHYN#GTLLDGTYFDSSYSR	YHYN(1)GTLLDGTYFDSSYSR	2369600000	0.661408
gnl|Xelaev18045869m|PAC4GC:7337940|fkbp10.S	YHYN#CSLMDGTLLFSSHEYETPQQITLGTYK	YHYN(1)CSLMDGTLLFSSHEYETPQQITLGTYK	167820000	0.0468423
gnl|Xelaev18045869m|PAC4GC:7337940|fkbp10.S	DPVDIEVTYRPETCN#TTSK	DPVDIEVTYRPETCN(1)TTSK	79021000	0.0220565
gnl|Xelaev18046037m|PAC4GC:7339206|itga3.S	VN#GSQILHYDR	VN(1)GSQILHYDR	531320000	0.148303
gnl|Xelaev18046037m|PAC4GC:7339206|itga3.S	GRVWN#STFLEDYR	GRVWN(1)STFLEDYR	173030000	0.0482965
gnl|Xelaev18046037m|PAC4GC:7339206|itga3.S	ACHPSGDVINPLN#LTVSDTSVK	ACHPSGDVINPLN(0.999)LTVSDTSVK	20639000	0.0057608
gnl|Xelaev18046048m|PAC4GC:7338285|slc4a1.S	GLSVSRPEN#R.S	GLSVSRPEN(1)R.S	42577000	0.0118842
gnl|Xelaev18046056m|PAC4GC:7338530|col1a1.S	LMATEASQN#ITYHCK	LMATEASQN(1)ITYHCK	1167900000	0.325987
gnl|Xelaev18046091m|PAC4GC:7338181|mrc2.S	WNDSPCN#QTLPSICK	WNDSPCN(1)QTLPSICK	25394000	0.00708803
gnl|Xelaev18046091m|PAC4GC:7338181|mrc2.S	FDQAYVNSLLYGSDGSYYWTALQDLN#DTGTFR	FDQAYVNSLLYGSDGSYYWTALQDLN(1)DTGTFR	18895000	0.00527401
gnl|Xelaev18046117m|PAC4GC:7339455|crtap.S	FHN#VTTMQR	FHN(1)VTTMQR	124860000	0.0348512
gnl|Xelaev18046230m|PAC4GC:7339278|lama5.S	VQSLYN#VSQGMVQQLK	VQSLYN(1)VSQGMVQQLK	8656300	0.00241616
gnl|Xelaev18046249m|PAC4GC:7339309|cdh26.S	LN#ATDPDKVPNR	LN(1)ATDPDKVPNR	54213000	0.015132
gnl|Xelaev18046249m|PAC4GC:7339309|cdh26.S	GN#YSVPLNIYDR	GN(1)YSVPLNIYDR	40379000	0.0112707
gnl|Xelaev18046417m|PAC4GC:7338527|sdk2.S	VTHYLPN#VTLEYR	VTHYLPN(1)VTLEYR	45888000	0.0128084
gnl|Xelaev18046417m|PAC4GC:7338527|sdk2.S	LN#ATNANTATVEVLNPSVR	LN(0.998)ATNANTATVEVLNPSVR	26527000	0.00740427
gnl|Xelaev18046417m|PAC4GC:7338527|sdk2.S	IQTLQSSPSMFPAN#VTLR	IQTLQSSPSMFPAN(1)VTLR	19452000	0.00542948
gnl|Xelaev18046417m|PAC4GC:7338527|sdk2.S	AIN#LTWAKPFDGNSPLLR	AIN(1)LTWAKPFDGNSPLLR	7419000	0.00207081
gnl|Xelaev18046417m|PAC4GC:7338527|sdk2.S	ESVPSSGPTN#VSALATTSSSILVR	ESVPSSGPTN(1)VSALATTSSSILVR	5886200	0.00164297
gnl|Xelaev18046430m|PAC4GC:7338810|btbd17.S	LQDLLQNSN#SSDTTLR	LQDLLQNSN(0.997)SSDTTLR	81422000	0.0227267
gnl|Xelaev18046539m|PAC4GC:7339116|pltp.S	IAN#MTCDASIER	IAN(1)MTCDASIER	68822000	0.0192097
gnl|Xelaev18046587m|PAC4GC:7339375|emilin3.S	LN#LTEEGIR	LN(1)LTEEGIR	5655800	0.00157866
gnl|Xelaev18046627m|PAC4GC:7337515|st3gal2.2.S	FN#GTIEPLLLGK	FN(1)GTIEPLLLGK	1646300	0.000459519
gnl|Xelaev18046742m|PAC4GC:7338029|mgat5b.S	IQAIAQN#VSDIAVK	IQAIAQN(1)VSDIAVK	8000700	0.00223317
gnl|Xelaev18046843m|PAC4GC:7339104|Xelaev18046843m	LVN#VTSEILK	LVN(1)VTSEILK	12772000	0.00356495
gnl|Xelaev18046988m|PAC4GC:7338690|chpf.S	NTLNTLAVAVN#R.T	NTLNTLAVAVN(1)R.T	39892000	0.0111347
gnl|Xelaev18047063m|PAC4GC:7337868|lrp1b.S	AFIN#GTSIETVISGDIHSIR	AFIN(1)GTSIETVISGDIHSIR	1833300	0.000511715
gnl|Xelaev18047109m|PAC4GC:7338327|galnt5.S	GAVDAQGPLN#DTLHQTDMK	GAVDAQGPLN(1)DTLHQTDMK	75373000	0.0210383
gnl|Xelaev18047157m|PAC4GC:7338947|LOC100490088.S	EAHAANIEMYAIGIVN#ASDATQIDFLR	EAHAANIEMYAIGIVN(0.999)ASDATQIDFLR	2749400	0.000767418
gnl|Xelaev18047171m|PAC4GC:7339144|itga6.S	AN#HSGAVVLLR	AN(1)HSGAVVLLR	1020400000	0.284816
gnl|Xelaev18047171m|PAC4GC:7339144|itga6.S	AN#VTGGLYVCDIK	AN(1)VTGGLYVCDIK	97597000	0.0272415
gnl|Xelaev18047252m|PAC4GC:7339137|col6a1.S	RN#FTATSAAGLTDEEIDNTIDTIIDMIK	RN(1)FTATSAAGLTDEEIDNTIDTIIDMIK	10226000	0.0028543
gnl|Xelaev18047254m|PAC4GC:7339243|col6a2.S	GTFTDCALSN#MTALIQK	GTFTDCALSN(1)MTALIQK	17339000	0.0048397
gnl|Xelaev18047269m|PAC4GC:7338428|Xelaev18047269m	FLN#STSLNTGAALK	FLN(0.998)STSLNTGAALK	2554200	0.000712934
gnl|Xelaev18047271m|PAC4GC:7337718|unnamed.S	ISVLQHAPYEHLTN#ASISPAR	ISVLQHAPYEHLTN(1)ASISPAR	113500000	0.0316804
gnl|Xelaev18047287m|PAC4GC:7339346|ugt1a6.S	DFLQN#STLIR	DFLQN(1)STLIR	138560000	0.0386752
gnl|Xelaev18047294m|PAC4GC:7338356|fn1.S	WTPLN#SSNIIGYR	WTPLN(0.999)SSNIIGYR	265420000	0.0740846
gnl|Xelaev18047294m|PAC4GC:7338356|fn1.S	DQCIVDGLTYNVN#SSFTK	DQCIVDGLTYNVN(0.995)SSFTK	45148000	0.0126018
gnl|Xelaev18047294m|PAC4GC:7338356|fn1.S	LHEEGHMMN#CTCFGQGR	LHEEGHMMN(1)CTCFGQGR	7072100	0.00197398
gnl|Xelaev18047368m|PAC4GC:7337512|nrp2.S	IILN#SSKGEEEYQVVIEGIVGK	IILN(1)SSKGEEEYQVVIEGIVGK	23208000	0.00647787
gnl|Xelaev18047493m|PAC4GC:7337846|naga.S	LGIYSDMGN#YTCGGYPGTTLDTIK	LGIYSDMGN(1)YTCGGYPGTTLDTIK	17986000	0.00502029
gnl|Xelaev18047512m|PAC4GC:7338137|nomo3.S	LEN#MTAGTYTLEAQK	LEN(1)MTAGTYTLEAQK	49896000	0.0139271
gnl|Xelaev18047592m|PAC4GC:7339209|fam20c.S	FGN#ETFIIHLDNGR	FGN(1)ETFIIHLDNGR	13584000	0.00379159
gnl|Xelaev18047721m|PAC4GC:7338861|LOC100493268.S	IFIVDEQLPVFKVEAIN#VTYR	IFIVDEQLPVFKVEAIN(1)VTYR	565940	0.000157966
gnl|Xelaev18047779m|PAC4GC:7337715|LOC101733326.S	QLGNLLMN#STAIR	QLGNLLMN(1)STAIR	158330000	0.0441934
gnl|Xelaev18047781m|PAC4GC:7338433|msln.S	LMDLDPGLIVN#ASK	LMDLDPGLIVN(1)ASK	316390000	0.0883114
gnl|Xelaev18047781m|PAC4GC:7338433|msln.S	FLPSN#FSCDSFQAVMK	FLPSN(1)FSCDSFQAVMK	161530000	0.0450866
gnl|Xelaev18047781m|PAC4GC:7338433|msln.S	LNN#FTSSTLSDLGQTAVGLSTSQISSIK	LNN(0.91)FTSSTLSDLGQTAVGLSTSQISSIK	116670000	0.0325652
gnl|Xelaev18047781m|PAC4GC:7338433|msln.S	NVN#SSTWINGNFGK	NVN(1)SSTWINGNFGK	95420000	0.0266338
gnl|Xelaev18047781m|PAC4GC:7338433|msln.S	WN#ITSVDTLESLLK	WN(1)ITSVDTLESLLK	39558000	0.0110415
gnl|Xelaev18047781m|PAC4GC:7338433|msln.S	PLAQGLIN#K.T	PLAQGLIN(1)K.T	38550000	0.0107602
gnl|Xelaev18047781m|PAC4GC:7338433|msln.S	AFYTNVGAAN#ISILSADSK	AFYTNVGAAN(1)ISILSADSK	36993000	0.0103256
gnl|Xelaev18047781m|PAC4GC:7338433|msln.S	EIYLFSSPPSNAN#TTACK	EIYLFSSPPSNAN(0.982)TTACK	34074000	0.00951081
gnl|Xelaev18047781m|PAC4GC:7338433|msln.S	LN#SSNADIMLSN#LTGQFQN#VSK	LN(0.999)SSNADIMLSN(1)LTGQFQN(1)VSK	27031000	0.00754495
gnl|Xelaev18047781m|PAC4GC:7338433|msln.S	GIMSFANNEILSN#ISNDVLVSWIK	GIMSFANNEILSN(0.996)ISNDVLVSWIK	26110000	0.00728788
gnl|Xelaev18047781m|PAC4GC:7338433|msln.S	DNSLPLTYPTEQLNACLN#DTILK	DNSLPLTYPTEQLNACLN(0.973)DTILK	5995300	0.00167342
gnl|Xelaev18047811m|PAC4GC:7338269|pdia2.S	IPNHLLLFIN#K.S	IPNHLLLFIN(1)K.S	71554000	0.0199723
gnl|Xelaev18047827m|PAC4GC:7339338|ptx4.S	LQGIAENYN#LSYNIDAR	LQGIAENYN(0.985)LSYNIDAR	5192000	0.0014492
gnl|Xelaev18047842m|PAC4GC:7339528|LOC100496280.S	N#TTGSPQYVVNNFRPLQELNSR	N(1)TTGSPQYVVNNFRPLQELNSR	9666700	0.00269819
gnl|Xelaev18047847m|PAC4GC:7339072|prr14.S	QEGN#LTPMGLPK	QEGN(1)LTPMGLPK	4380000	0.00122255
gnl|Xelaev18047924m|PAC4GC:7339127|gaa.S	WGYSTSN#CTR	WGYSTSN(1)CTR	188790000	0.0526955
gnl|Xelaev18047924m|PAC4GC:7339127|gaa.S	FNMFGVPMVGADICGFGGN#TTEELCVR	FNMFGVPMVGADICGFGGN(1)TTEELCVR	93633000	0.026135
gnl|Xelaev18047924m|PAC4GC:7339127|gaa.S	MDN#LTQTDR	MDN(1)LTQTDR	16610000	0.00463622
